# Supplementary material for: Integrating deep mutational scanning and low-throughput mutagenesis data to predict the impact of amino acid variants
Source: PubMed Central journal article supplement (PMC10506130; doi:10.1093/gigascience/giad073), 2023-09-18

# GigaScience

## Integrating deep mutational scanning and low-throughput mutagenesis data to predict the impact of amino acid variants

--Manuscript Draft--

|                                                      |                                                                                                                                                                                                                                                                                                                                                                                                                                                                                                                                                                                                                                                                                                                                                                                                                                                                                                                                                                                                                                             |                                  |
|------------------------------------------------------|---------------------------------------------------------------------------------------------------------------------------------------------------------------------------------------------------------------------------------------------------------------------------------------------------------------------------------------------------------------------------------------------------------------------------------------------------------------------------------------------------------------------------------------------------------------------------------------------------------------------------------------------------------------------------------------------------------------------------------------------------------------------------------------------------------------------------------------------------------------------------------------------------------------------------------------------------------------------------------------------------------------------------------------------|----------------------------------|
| <b>Manuscript Number:</b>                            | GIGA-D-23-00040R1                                                                                                                                                                                                                                                                                                                                                                                                                                                                                                                                                                                                                                                                                                                                                                                                                                                                                                                                                                                                                           |                                  |
| <b>Full Title:</b>                                   | Integrating deep mutational scanning and low-throughput mutagenesis data to predict the impact of amino acid variants                                                                                                                                                                                                                                                                                                                                                                                                                                                                                                                                                                                                                                                                                                                                                                                                                                                                                                                       |                                  |
| <b>Article Type:</b>                                 | Research                                                                                                                                                                                                                                                                                                                                                                                                                                                                                                                                                                                                                                                                                                                                                                                                                                                                                                                                                                                                                                    |                                  |
| <b>Funding Information:</b>                          | National Health and Medical Research Council (116955)                                                                                                                                                                                                                                                                                                                                                                                                                                                                                                                                                                                                                                                                                                                                                                                                                                                                                                                                                                                       | Professor Anthony Troy Papenfuss |
|                                                      | National Human Genome Research Institute (RM1HG010461)                                                                                                                                                                                                                                                                                                                                                                                                                                                                                                                                                                                                                                                                                                                                                                                                                                                                                                                                                                                      | Dr Alan F. Rubin                 |
|                                                      | National Human Genome Research Institute (UM1HG011969)                                                                                                                                                                                                                                                                                                                                                                                                                                                                                                                                                                                                                                                                                                                                                                                                                                                                                                                                                                                      | Dr Alan F. Rubin                 |
|                                                      | Lorenzo and Pamela Galli Medical Research Trust                                                                                                                                                                                                                                                                                                                                                                                                                                                                                                                                                                                                                                                                                                                                                                                                                                                                                                                                                                                             | Professor Anthony Troy Papenfuss |
|                                                      | Stafford Fox Medical Research Foundation                                                                                                                                                                                                                                                                                                                                                                                                                                                                                                                                                                                                                                                                                                                                                                                                                                                                                                                                                                                                    | Professor Anthony Troy Papenfuss |
|                                                      | Melbourne Research Scholarship                                                                                                                                                                                                                                                                                                                                                                                                                                                                                                                                                                                                                                                                                                                                                                                                                                                                                                                                                                                                              | Mr Yunfan Fu                     |
| <b>Abstract:</b>                                     | <p>Background: Evaluating the impact of amino acid variants has been a critical challenge for studying protein function and interpreting genomic data. High-throughput experimental methods like deep mutational scanning (DMS) can measure the effect of large numbers of variants in a target protein, but because DMS studies have not been performed on all proteins, researchers also model DMS data computationally to estimate variant impacts by predictors.</p> <p>Results: In this study, we extended a linear regression-based predictor to explore whether incorporating data from alanine scanning (AS), a widely-used low-throughput mutagenesis method, would improve prediction results. To evaluate our model, we collected 146 AS datasets, mapping to 54 DMS datasets across 22 distinct proteins.</p> <p>Conclusions: We show that improved model performance depends on the compatibility of the DMS and AS assays, and the scale of improvement is closely related to the correlation between DMS and AS results.</p> |                                  |
| <b>Corresponding Author:</b>                         | Alan F. Rubin, PhD<br>Walter and Eliza Hall Institute of Medical Research<br>Parkville, VIC AUSTRALIA                                                                                                                                                                                                                                                                                                                                                                                                                                                                                                                                                                                                                                                                                                                                                                                                                                                                                                                                       |                                  |
| <b>Corresponding Author Secondary Information:</b>   |                                                                                                                                                                                                                                                                                                                                                                                                                                                                                                                                                                                                                                                                                                                                                                                                                                                                                                                                                                                                                                             |                                  |
| <b>Corresponding Author's Institution:</b>           | Walter and Eliza Hall Institute of Medical Research                                                                                                                                                                                                                                                                                                                                                                                                                                                                                                                                                                                                                                                                                                                                                                                                                                                                                                                                                                                         |                                  |
| <b>Corresponding Author's Secondary Institution:</b> |                                                                                                                                                                                                                                                                                                                                                                                                                                                                                                                                                                                                                                                                                                                                                                                                                                                                                                                                                                                                                                             |                                  |
| <b>First Author:</b>                                 | Yunfan Fu                                                                                                                                                                                                                                                                                                                                                                                                                                                                                                                                                                                                                                                                                                                                                                                                                                                                                                                                                                                                                                   |                                  |
| <b>First Author Secondary Information:</b>           |                                                                                                                                                                                                                                                                                                                                                                                                                                                                                                                                                                                                                                                                                                                                                                                                                                                                                                                                                                                                                                             |                                  |
| <b>Order of Authors:</b>                             | Yunfan Fu                                                                                                                                                                                                                                                                                                                                                                                                                                                                                                                                                                                                                                                                                                                                                                                                                                                                                                                                                                                                                                   |                                  |
|                                                      | Justin Bedó, PhD                                                                                                                                                                                                                                                                                                                                                                                                                                                                                                                                                                                                                                                                                                                                                                                                                                                                                                                                                                                                                            |                                  |
|                                                      | Anthony Troy Papenfuss, BSc (Hons) PhD                                                                                                                                                                                                                                                                                                                                                                                                                                                                                                                                                                                                                                                                                                                                                                                                                                                                                                                                                                                                      |                                  |
|                                                      | Alan F. Rubin, PhD                                                                                                                                                                                                                                                                                                                                                                                                                                                                                                                                                                                                                                                                                                                                                                                                                                                                                                                                                                                                                          |                                  |
| <b>Order of Authors Secondary Information:</b>       |                                                                                                                                                                                                                                                                                                                                                                                                                                                                                                                                                                                                                                                                                                                                                                                                                                                                                                                                                                                                                                             |                                  |
| <b>Response to Reviewers:</b>                        | We thank the reviewers for their thoughtful comments, which helped us improve our                                                                                                                                                                                                                                                                                                                                                                                                                                                                                                                                                                                                                                                                                                                                                                                                                                                                                                                                                           |                                  |

|                                                                                                                                                                                                                                                                                                                                                                                                                                                                                                                                     |                                                                                                                                                                                                                                                             |
|-------------------------------------------------------------------------------------------------------------------------------------------------------------------------------------------------------------------------------------------------------------------------------------------------------------------------------------------------------------------------------------------------------------------------------------------------------------------------------------------------------------------------------------|-------------------------------------------------------------------------------------------------------------------------------------------------------------------------------------------------------------------------------------------------------------|
|                                                                                                                                                                                                                                                                                                                                                                                                                                                                                                                                     | <p>study and the manuscript.</p> <p>We have attached a detailed response to the reviews (Review_response_untracked.pdf) as well as a version of the updated manuscript with all changes from the original submission highlighted (diff_manuscript.pdf).</p> |
| <b>Additional Information:</b>                                                                                                                                                                                                                                                                                                                                                                                                                                                                                                      |                                                                                                                                                                                                                                                             |
| <b>Question</b>                                                                                                                                                                                                                                                                                                                                                                                                                                                                                                                     | <b>Response</b>                                                                                                                                                                                                                                             |
| Are you submitting this manuscript to a special series or article collection?                                                                                                                                                                                                                                                                                                                                                                                                                                                       | No                                                                                                                                                                                                                                                          |
| <p><b>Experimental design and statistics</b></p> <p>Full details of the experimental design and statistical methods used should be given in the Methods section, as detailed in our <a href="#">Minimum Standards Reporting Checklist</a>. Information essential to interpreting the data presented should be made available in the figure legends.</p> <p>Have you included all the information requested in your manuscript?</p>                                                                                                  | Yes                                                                                                                                                                                                                                                         |
| <p><b>Resources</b></p> <p>A description of all resources used, including antibodies, cell lines, animals and software tools, with enough information to allow them to be uniquely identified, should be included in the Methods section. Authors are strongly encouraged to cite <a href="#">Research Resource Identifiers</a> (RRIDs) for antibodies, model organisms and tools, where possible.</p> <p>Have you included the information requested as detailed in our <a href="#">Minimum Standards Reporting Checklist</a>?</p> | Yes                                                                                                                                                                                                                                                         |
| <p><b>Availability of data and materials</b></p> <p>All datasets and code on which the conclusions of the paper rely must be either included in your submission or deposited in <a href="#">publicly available repositories</a> (where available and ethically appropriate), referencing such data using</p>                                                                                                                                                                                                                        | Yes                                                                                                                                                                                                                                                         |

a unique identifier in the references and in the “Availability of Data and Materials” section of your manuscript.

Have you have met the above requirement as detailed in our [Minimum Standards Reporting Checklist](#)?

# 1 Integrating deep mutational scanning and low-through- 2 put mutagenesis data to predict the impact of amino acid 3 variants

4

## 5 Authors:

6 Yunfan Fu<sup>1,2</sup>, Justin Bedö<sup>1,2,\*</sup>, Anthony T. Papenfuss<sup>1,2,3,\*,\*\*</sup>, Alan F. Rubin<sup>1,2,\*,\*\*</sup>

7

## 8 Affiliations:

9 <sup>1</sup>The Walter and Eliza Hall Institute of Medical Research, Parkville, VIC 3052, Australia.

10 <sup>2</sup>Department of Medical Biology, The University of Melbourne, Parkville, VIC 3010, Australia.

11 <sup>3</sup>Peter MacCallum Cancer Centre, Melbourne, VIC 3000, Australia.

12

13 \* Contributed equally

14 \*\* To whom correspondence should be addressed (papenfuss@wehi.edu.au & alan.rubin@wehi.edu.au)

15

## 16 Abstract

17 **Background:** Evaluating the impact of amino acid variants has been a critical challenge for  
18 studying protein function and interpreting genomic data. High-throughput experimental meth-  
19 ods like deep mutational scanning (DMS) can measure the effect of large numbers of variants  
20 in a target protein, but because DMS studies have not been performed on all proteins, research-  
21 ers also model DMS data computationally to estimate variant impacts by predictors.

22 **Results:** In this study, we extended a linear regression-based predictor to explore whether in-  
23 corporating data from alanine scanning (AS), a widely used low-throughput mutagenesis

24 method, would improve prediction results. To evaluate our model, we collected 146 AS da-  
25 taset, mapping to 54 DMS datasets across 22 distinct proteins.

26 **Conclusions:** We show that improved model performance depends on the compatibility of the  
27 DMS and AS assays, and the scale of improvement is closely related to the correlation between  
28 DMS and AS results.

29

30 **Keywords:** deep mutational scanning, alanine scanning, machine learning, predictor

31

## 32 **1 Introduction**

33 Deep mutational scanning (DMS) is a functional genomics method that can experimentally  
34 measure the impact of many thousands of protein variants by combining high-throughput se-  
35 quencing with a functional assay [1]. In a typical DMS, a cDNA library of genetic variants of  
36 a target gene is generated, containing all possible single amino acid substitutions. This variant  
37 library is then expressed in a functional assay system where the DMS variants can be selected  
38 based on their properties. The change in variant frequency in the pre- and post-selection popu-  
39 lations is determined by high-throughput sequencing which is then used to calculate a multi-  
40 plexed functional score that captures the variant’s impact [2–4]. The versatility of DMS assays  
41 makes it possible to measure variant impact on a wide range of protein properties, including  
42 protein binding affinity [5,6], protein abundance [7–9], enzyme activity [10,11] and cell sur-  
43 vival [12–14]. So far, hundreds of DMS studies covering tens of thousands of nucleotides have  
44 been published [15], and experiments targeting over a hundred additional genes are underway  
45 according to MaveRegistry [16].

46

47 Computational studies have used DMS data to build predictive models of variant impact. These  
48 predictors use supervised or semi-supervised learning models trained on experimental DMS  
49 data and various protein features to make predictions [17–23]. Envision is one such method  
50 that used protein structural, physicochemical, and evolutionary features to predict variant effect  
51 scores and was trained on DMS data from 8 proteins using gradient boosting [17]. Another  
52 method, DeMaSk, predicted DMS scores by combining two evolutionary features (protein po-  
53 sitional conservation and variant homologous frequency) with a DMS substitution matrix and  
54 was trained on data from 17 proteins using a linear model [19]. Deep learning algorithms have  
55 also been applied to build protein fitness predictors [18,20], which are usually based only on  
56 variant sequences. These variant effect predictors can also be benchmarked using DMS exper-  
57 imental results and assist in the interpretation of experimental data [20,24,25].

58

59 Low-throughput mutagenesis experiments that measure tens of variants at a time have also  
60 been used extensively to study diverse protein properties, including substrate binding affinity  
61 [26,27], protein stability [28,29], and protein-specific activities [30,31]. Alanine scanning (AS)  
62 is a widely-used low-throughput mutagenesis method [32,33], and AS data are available for  
63 many proteins. In this method, each targeted protein residue is substituted with alanine, and the  
64 impacts of these variants are measured by a functional assay [34]. AS experiments are typically  
65 used to identify functional hot spots or critical residues in the target protein [35,36] and have  
66 been used as a source of independent validation for DMS studies [31,37–39].

67

68 In this study, we explore whether a predictive model can be improved by incorporating low-  
69 throughput mutagenesis data (Fig 1). We find that AS data can increase prediction accuracy

70 and that the improvement is related to the similarity of the functional assays and the correlation  
71 of DMS and AS results.

72

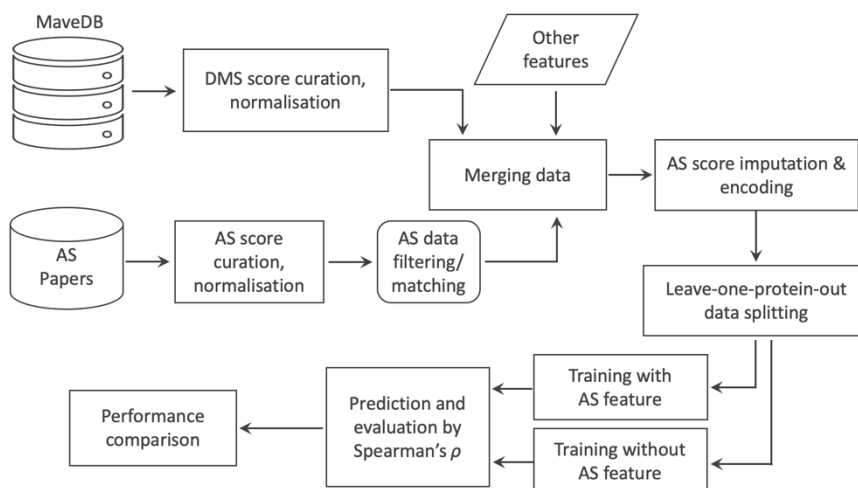

73

74 **Fig 1. Workflow for model training and testing.** DMS and AS datasets are collected from online resources and  
75 are normalized. DMS and AS datasets targeting the same protein are then matched, filtered and merged. Two  
76 predictors are constructed and tested: the first uses DMS data, AS data and other protein features, and the second  
77 uses only DMS data and the same other protein features.

78

## 79 2 Results

### 80 2.1 Overview of DMS and alanine scanning (AS) data

81 To build the predictive model, 130 DMS datasets were collected from MaveDB [40,41] (Sup-  
82 plementary table 1). We searched the literature and found 146 AS datasets targeting the same  
83 proteins as 54 of the DMS datasets. In total, we obtained both DMS and AS data for 22 different  
84 proteins: 17 human proteins, three yeast proteins, and two bacterial proteins. Most DMS ex-  
85 periments were highly complete, with a mean coverage of 95.0% of all possible single amino  
86 acid substitutions assayed in the target region, comprising 373,219 total protein variant meas-  
87 urements. AS data were only available on a small number of protein residues (Fig 2), and we

88 were able to curate 1,480 alanine substitution scores from the 146 studies. Variant scores from  
 89 collected DMS and AS studies were linearly normalized to a common scale (see Methods) to  
 90 make them comparable across datasets (Fig S1).

91

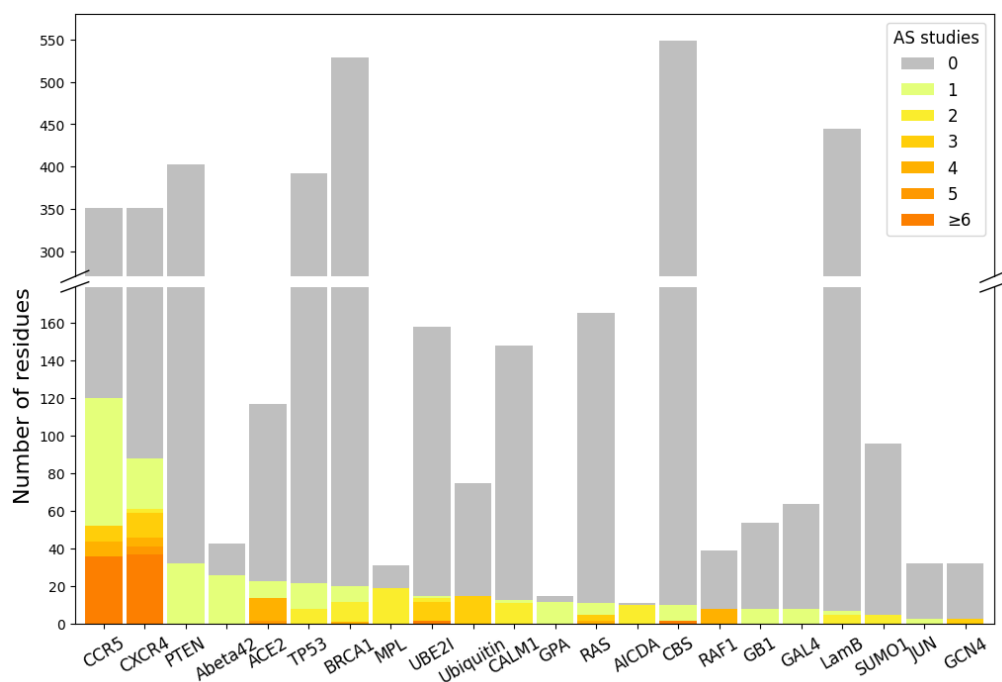

92

93 **Fig 2. DMS data generally cover more protein residues than AS data.** Each bar shows the number of residues  
 94 assayed by DMS studies on given target proteins. Colour indicates the number of AS studies available for the  
 95 DMS-tested residues.

96

## 97 2.2 The correlation of DMS and AS scores is related to assay compatibility

98 To evaluate the similarity of AS and DMS scores, we calculated Spearman's correlation ( $\rho$ )  
 99 between the AS scores and DMS scores for the same alanine substitutions. Since each protein  
 100 may have results from several AS and DMS experiments, we calculated  $\rho$  between each possi-  
 101 ble pair. The median  $\rho$  over DMS and AS data (DMS/AS) pairs was 0.2, indicating that the  
 102 experimental scores were poorly correlated overall (Fig 3).

103



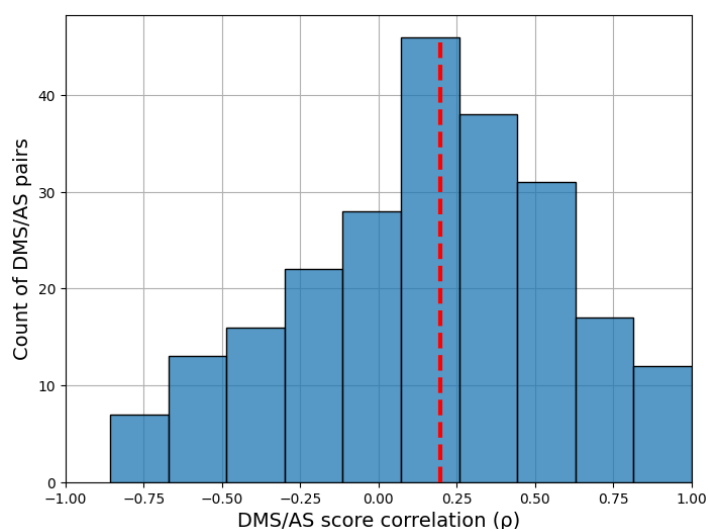

104

105 **Fig 3. Correlation between DMS and AS data shows substantial variation.** We calculated Spearman's  $\rho$  be-  
 106 tween alanine substitution scores in each pair of AS and DMS data. The results for pairs with less than three  
 107 alanine substitutions are not shown. The red dashed line shows the median  $\rho$ .

108

109 We then considered if differences between AS and DMS assay designs might contribute to this  
 110 low agreement between scores. To explore this, we developed a decision tree (Fig S2) to clas-  
 111 sify whether DMS/AS pairs had low, medium, or high assay compatibility, which we defined  
 112 as a similarity measurement of the functional assays performed. For example, the DMS assay  
 113 measuring the binding affinity of a cell surface protein, CXCR4, to its natural ligand [42] has  
 114 high compatibility with the AS experiment also measuring this ligand binding but has low  
 115 compatibility with the study on CXCR4's ability to facilitate virus infection [43]. A full assay  
 116 compatibility table can be found in Supplementary Table 1 with the compatibility classifica-  
 117 tions and justification for each pair. We then compared DMS and AS score correlation for each  
 118 compatibility class and found that score correlations were closely related to assay compatibility.  
 119 Data from low compatibility assays had a median correlation of 0.15, rising to 0.19 for medium  
 120 compatibility assays and 0.40 for high compatibility assays (Fig 4). This trend of increased  
 121 correlation for high compatibility assay pairs holds across secondary structures (Table S1).

122 This link between assay compatibility and score correlation indicates that our decision tree  
123 approach was able to capture the similarity between assay systems.  
124

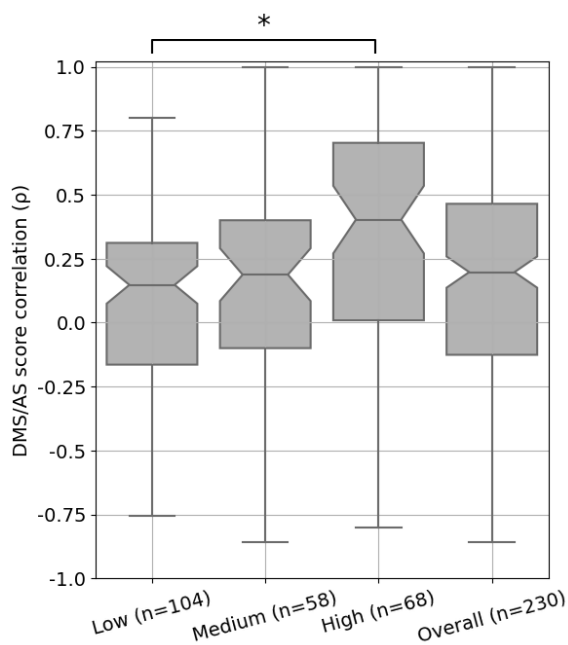

125  
126 **Fig 4. DMS and AS data pairs with high assay compatibility show a higher score correlation.** Each box  
127 shows the Spearman's  $\rho$  between DMS and AS data pairs for each level of assay compatibility or overall. The  
128 correlation coefficients were calculated between alanine substitution scores in each pair of AS and DMS datasets.  
129 Results for pairs with less than three alanine substitutions were removed. P-values calculated using Welch's test  
130 and corrected using Holm-Šidák, \*:  $p < 0.05$ ; notches show 95% confidence interval around median, and whiskers  
131 show the full value range.

132

### 133 2.3 Compatible AS data improve DMS score prediction accuracy

134 To test if incorporating AS data into DMS score models would improve prediction accuracy,  
135 we decided to build a new model based on DeMaSk [19]. We chose DeMaSk because it showed  
136 better performance compared to similar methods and was straightforward to modify. The pub-  
137 lished DeMaSk model predicts DMS scores using protein positional conservation, variant ho-

138 homologous frequency, and substitution score matrix, and we incorporated AS data as an addi-  
139 tional feature. Our new predictor was modelled with all 130 DMS we collected and we applied  
140 a leave-one-protein-out cross-validation approach to training and testing, avoiding information  
141 leakage for variants of the same protein target [17]. Prediction performance was evaluated us-  
142 ing the Spearman's correlation ( $\rho$ ) between the experimentally-derived DMS scores and the  
143 predicted scores for each pair of DMS and AS studies. The performance of our DMS/AS model  
144 was compared with a model trained only on DMS data, equivalent to retrained DeMaSk (Fig  
145 S3), by calculating the change of prediction  $\rho$  (see Methods).

146

147 We trained our model with either all or a subset of AS data we collected (Fig 5, Table S2). We  
148 first integrated all 146 AS data collected for training and evaluation but observed only a modest  
149 improvement of prediction  $\rho$  (Fig 5 left box, and Fig S4). We then retrained and evaluated our  
150 model on filtered AS data with only high compatibility assays, and observed a median increase  
151 in prediction Spearman's  $\rho$  of 0.1 compared to the results with no AS data (Fig 5 middle box,  
152 and Fig S4). However, training with both high and medium compatibility pairs reduced the  
153 performance improvement (Fig S5). These results indicate that medium and low compatibility  
154 pairs might provide inconsistent training data, degrading model performance. We also evalu-  
155 ated the impact of including high compatibility AS data in an alternative model based on En-  
156 vision [17], and found similar results (Fig S6). To differentiate between high assay compatibil-  
157 ity and high DMS/AS score correlation, we trained the model using the most highly correlated  
158 AS result for each DMS dataset (see Methods). Although the upper quartile was high, the me-  
159 dian performance change of this predictor was lower than the high assay compatibility model,  
160 suggesting that matching with the highest score correlation alone is insufficient (Fig 5 right  
161 box). However, when applying a stricter threshold, the correlation matched models still show

162 limited improvement (Fig S7). Additionally, to ensure the models performance is not biased  
163 by pseudo-replication of multiple datasets, we averaged DMS and AS scores that were part of  
164 the same study and type of assay, and saw similar results (Fig S8).  
165

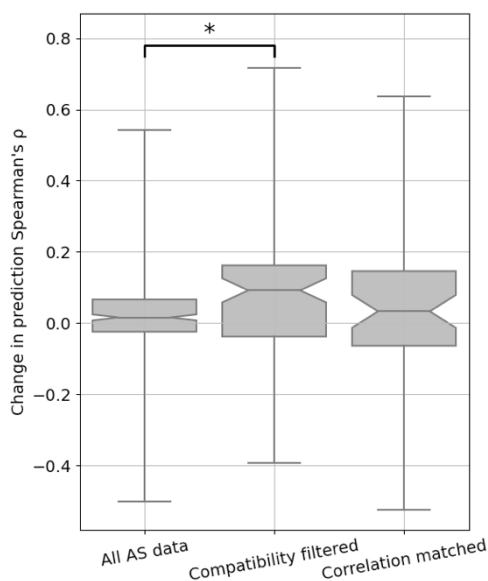

166  
167 **Fig 5. Performance of variant impact prediction is improved using AS data with high assay compatibility.**

168 The change in prediction  $\rho$  achieved by including the AS data feature for each DMS and AS data pair is shown as  
169 box plots. A higher value represents higher prediction accuracy achieved for using AS data. Different approaches  
170 to filtering/matching the data are shown on the x-axis: “All AS data” used all available data; “Compatibility fil-  
171 tered” used only data of high assay compatibility; “Correlation matched” used only data with the highest regular-  
172 ised correlation for each DMS dataset. Results for data pairs with only one residue are not shown. P-values were  
173 calculated using Welch’s test and jointly corrected using Holm-Šidák (Methods), \*:  $p < 0.05$ . Notches show the  
174 95% confidence interval around the median, and whiskers show the full value range.

175  
176 Our compatibility-filtered predictor shows improved prediction accuracy for these regions  
177 compared to not only the baseline model, but other widely used predictors as well (Fig S9). To  
178 further explore the higher performance of this compatibility-filtered predictor, we examined  
179 the relationship between prediction  $\rho$  change and score correlation for each high compatibility

180 DMS/AS pair (Fig 6). For most pairs, prediction performance was improved by using AS data,  
181 and the scale of improvement was also related to the score correlation. This relationship could  
182 also be observed for multiple DMS/AS pairs from an individual protein, such as CXCR4 and  
183 CCR5. We saw the same trend in the predictor trained with all DMS/AS pairs but noted that  
184 the performance even of highly correlated pairs was worse, likely due to the influence of low  
185 compatibility training data on the model (Fig S10).

186

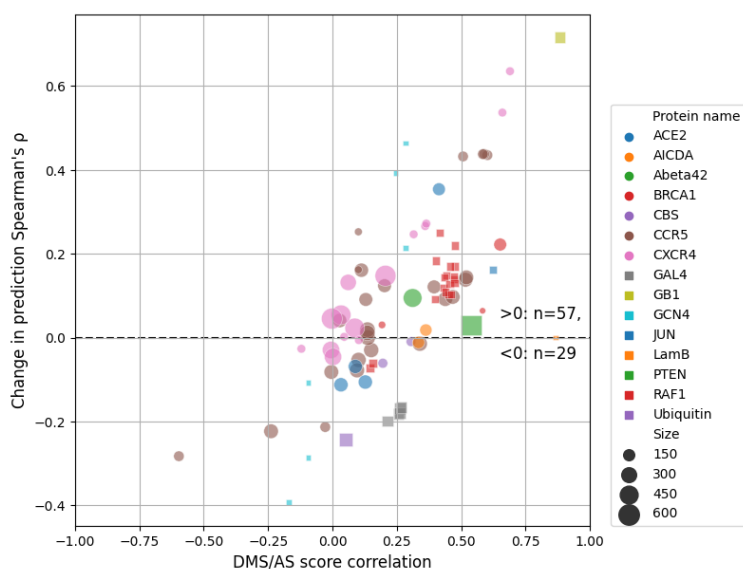

187

188 **Fig 6. Prediction performance change is related to DMS and AS score correlation.** Each dot represents a  
189 filtered DMS/AS data pair of high assay compatibility. The vertical axis shows the change of prediction  $\rho$  by using  
190 AS data (larger means higher performance achieved by using AS data). The horizontal axis shows the DMS/AS  
191 score correlation for *all* variants on the matched residues rather than just alanine substitutions. The colours and  
192 shapes of the dots correspond to the target protein, and size indicates the number of variants in each data pair.  
193 Results for data pairs with only one residue are not shown.

194

195 We also explored the consequences of the sparsity of AS data on our model in three ways: i)  
196 by training only with variants that have AS data available (Fig S11); ii) by using a boosting

197 approach that focuses only on residues with AS data (Fig S12) and iii) by using complete ala-  
 198 nine substitution information from DMS as the AS feature (Fig S13). The first approach gave  
 199 lower absolute prediction performance, presumably because the model was under-fitted due to  
 200 the small number of variants. The last two approaches performed very similarly to the primary  
 201 model constructed using high-compatibility DMS/AS data and simple mean score imputation.  
 202  
 203 To test the influence of amino acids on our predictor, we grouped the prediction results by  
 204 either wild-type or variant amino acid and calculated the prediction improvement when AS  
 205 data were included (Fig 7). We found that 14 of 19 wild-type amino acids performed better  
 206 with the addition of AS data, with cysteine showing the largest improvement and performing  
 207 worst in the model lacking AS data. 18 of 20 variant amino acids benefited from the inclusion  
 208 of AS data, with marginal performance decrease on lysine and aspartic acid ( $|\Delta\rho| < 0.01$ ) (Fig  
 209 7). We also noticed that variants to alanine are not most improved, however we observed an  
 210 overall trend showing higher improvement for amino acids that are physiochemically similar  
 211 to alanine (Fig S15).

212

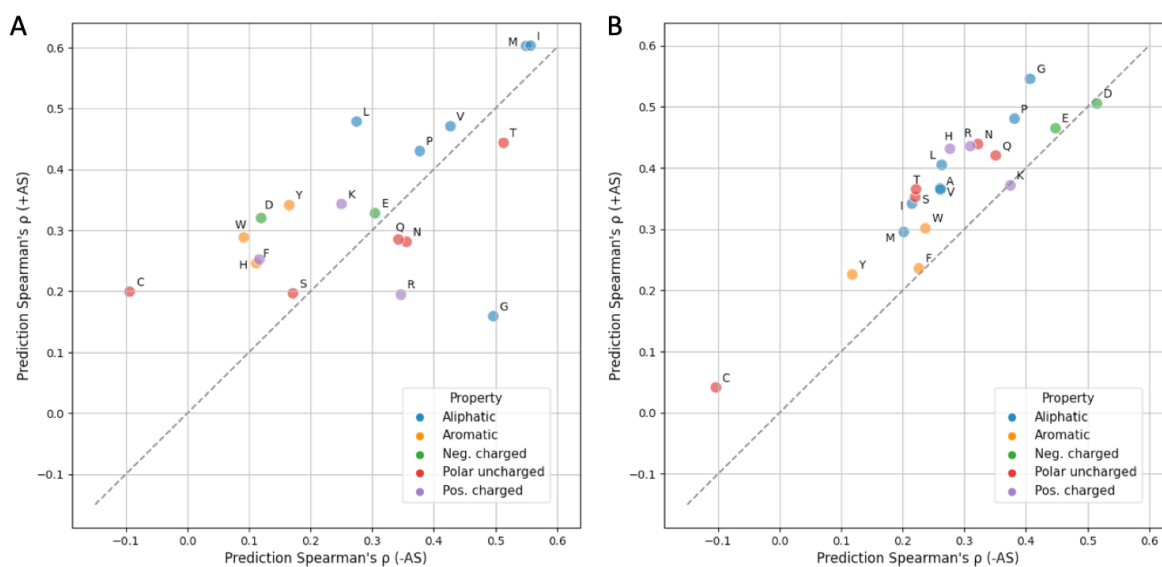

213

214 **Fig 7. Model performance is generally improved for each wild-type and variant amino acid.** Prediction  
215 Spearman's  $\rho$  when using (y-axis) or not using (x-axis) AS data on each wild-type (A) or variant (B) amino acid  
216 is shown in the scatter plots. The results are coloured according to the property of each amino acid type. Alanine  
217 (A) result is not applicable in the first figure since alanine scanning data are always missing when the wildtype is  
218 alanine itself. Absolute count for each amino acid can be found in Fig S14. (Neg.: negatively, Pos.: positively)

219

### 220 **3 Discussion**

221 In this study, we integrated alanine scanning (AS) data into deep mutational scanning (DMS)  
222 score prediction, leading to modest improvements in the accuracy of variant score prediction.  
223 We also explored the impact of the diversity of protein properties measured by DMS and AS.  
224 Filtering DMS and AS data based on our manual classification of assay type compatibility led  
225 to improved prediction performance.

226

227 A potential shortcoming of our current approach is that AS data were available for only a small  
228 proportion of the DMS data. Although most recent DMS studies can analyze variants of the  
229 whole protein, most AS experiments only cover a handful of residues in the target protein,  
230 leaving missing AS scores for the vast majority of residues. We explored this here and found  
231 that alternative methods for addressing the sparsity of AS data did not improve or degrade  
232 performance, but we anticipate further improved prediction accuracy if the low completeness  
233 and unevenness of AS data are appropriately handled before modelling.

234

235 In this study, we identified the importance of DMS/AS assay compatibility as a crucial factor  
236 for improving prediction accuracy. An issue with using this concept is that it further shrinks  
237 already sparse data. It also fails to take advantage of the fact that even for low compatible  
238 assays some fundamental information like protein abundance can still be mutually captured.

239 Instead of hard filtering, proper implementation of this underlying information may facilitate  
240 variant impact prediction in the future. Nonetheless, filtering on assay compatibility still leads  
241 to performance improvement. We also briefly explored whether the consistency of DMS and  
242 AS scores can be considered more directly by matching the best correlated AS data for each  
243 DMS dataset. Consistency is partially driven by assay compatibility but also reflects other fea-  
244 tures of the data, such as bias and noise.

245

246 The concepts of compatibility and data quality are also relevant to training any DMS-based  
247 predictors. DMS assays have been developed to measure variant impacts to distinct protein  
248 properties, and a variant can behave similarly to wildtype when measured by one assay yet  
249 show altered protein properties in other assay results, which are frequently found in regions  
250 with specific biochemical functions [25,52–56]. With more experimental assays to be applied,  
251 the diverse measurements may impede the progress of future DMS-based predictors unless this  
252 assay effect is properly addressed, for example, by building assay specific predictors. Meas-  
253 urement error is another source of DMS data heterogeneity that potentially affects the model  
254 performance. In our current study, DMS scores of protein variants are weighted equally while  
255 training. Adjustable weighting can be applied in future studies to adapt the distinct experi-  
256 mental error between individual variants and datasets, reducing the influence of low-confident  
257 data.

258

259 In summary, we conclude that the careful inclusion of low-throughput mutagenesis data im-  
260 proves the prediction of DMS scores, and the approaches described here can potentially be  
261 applied to other prediction methods.

262



## 263 **4 Availability of supporting source code and requirements**

264 **Project name:** DMS\_with\_Alanine\_scan

265 **Project home page:** [https://github.com/PapenfussLab/DMS\\_with\\_Alanine\\_scan](https://github.com/PapenfussLab/DMS_with_Alanine_scan)

266 **Operating system:** Platform independent

267 **Programming language:** Python

268 **Other requirements:** Python 3.10 or higher

269 **Licence:** MIT Licence

270

## 271 **5 List of abbreviations**

272 DMS: deep mutational scanning

273 AS: alanine scanning

274

## 275 **6 Supporting information**

276 **Supplementary Table 1:** All candidate DMS and alanine scanning data with detailed dataset  
277 information.

278 **Supplementary Table 2:** Normalized DMS dataset with protein property features.

279 **Supplementary Table 3:** Normalized alanine scanning dataset.

280

## 281 **7 Author contributions**

282 YF developed the software and wrote the initial draft of the manuscript. AFR conceived the  
283 study. JB, AFR, and ATP oversaw the project. All authors reviewed, contributed to, and ap-  
284 proved the manuscript.

285

## 286 **8 Funding**

287 YF is supported by Melbourne Research Scholarship. ATP was supported by an Australian Na-  
288 tional Health and Medical Research Council (NHMRC) Senior Research Fellowship (1116955).  
289 JB, AFR and ATP were supported by the Lorenzo and Pamela Galli Medical Research Trust.  
290 JB and ATP were supported by the Stafford Fox Medical Research Foundation. AFR was sup-  
291 ported by the National Human Genome Research Institute of the NIH under award numbers  
292 RM1HG010461 and UM1HG011969. The research benefitted from support from the Victorian  
293 State Government Operational Infrastructure Support and Australian Government NHMRC  
294 Independent Research Institute Infrastructure Support.

295

## 296 **9 Methods**

### 297 **9.1 DMS data collection**

298 DMS data were downloaded from MaveDB [40,41] which were then filtered and curated. DMS  
299 experiments targeting antibody and virus proteins were removed because of their potentially  
300 unique functionality. We retrieved the UniProt accession ID of target proteins by searching the  
301 protein names or sequences in UniProt [57], and proteins lacking available UniProt ID were  
302 also excluded. Datasets that are computationally processed or their wildtype-like and nonsense-  
303 like scores (see Normalization) cannot be identified were also filtered out (Supplementary Ta-  
304 ble 1). All missense variants with only a single amino acid substitution were curated from the  
305 DMS studies for our analysis. A total of 130 DMS experiments from 53 studies [5,6,9-  
306 14,24,31,37-39,42,58-94] were collected for our analysis.

307

## 308 9.2 Collection of AS data and other features

309 The following process was used to search for candidate AS studies. Papers were identified by  
310 searching on PubMed and Google Scholar for the “alanine scan” or “alanine scanning” together  
311 with the name of candidate proteins. While searching in Google Scholar, we included the pro-  
312 tein’s UniProt ID rather than molecule name as the search term to reduce false positives. Ap-  
313 propriate AS data were collected from the search results. Western blot results were transformed  
314 to values by ImageJ if it was the only experimental data available in the study. A total 146 AS  
315 experiments were collected from 45 distinct studies [26–28,30,31,43–46,48,49,84,95–127].  
316 Protein features of Shannon entropy and the logarithm of variant amino acid frequency were  
317 downloaded from the DeMaSk online toolkit [19]. The substitution score matrix feature was  
318 calculated from the mean of training DMS scores for each of the 380 possible amino acid sub-  
319 stitutions before each iteration of cross-validation.

320

## 321 9.3 Normalization

322 DMS and AS datasets were normalized to a common scale using the following approach  
323 adapted from previous studies [17,47]. Let  $D$  denotes a protein study measuring scores  $s_i^D$  for  
324 a single variant  $i$ ,  $s_{wt}^D$  denotes the scores for wildtype and  $s_{non}^D$  represents the score for non-  
325 sense-like variants. The normalized scores  $s_i'^D$  are given by:

$$326 \quad s_i'^D := \frac{s_i^D - s_{wt}^D}{s_{wt}^D - s_{non}^D} + 1$$

327 Wild-type scores were directly identified from the paper or the median score of synonymous  
328 variants. For DMS data, since not all DMS studies report score of nonsense variants, we defined  
329 the nonsense-like scores as the median DMS scores for the 1% missense variants with the  
330 strongest loss of function for each dataset. For AS data, nonsense-like scores were either de-  
331 fined according to the paper or using the extreme values (Supplementary Table 1).

332

#### 333 **9.4 AS data filtering and matching**

334 AS data subsets were filtered/matched according to either assay compatibility or score corre-  
335 lation. For assay compatibility filtering, we first categorized each DMS or AS assay by the  
336 protein property or function using the following assay types: binding affinity, enzyme activity,  
337 protein abundance, cell survival, pathogen infection, drug response, ability to perform a novel  
338 function, or other protein-specific activities (e.g., transcription activity for transcription factors)  
339 (Supplementary Table 1). The DMS/AS assay pairs were then classified into three levels of  
340 compatibility based on these categories (Fig S2). For each DMS dataset, we first tried to use  
341 only AS data with high assay compatibility for further modelling, removing AS data of medium  
342 and low assay compatibility. We then also tried to model with AS data of both high and medium  
343 assay compatibility.

344 For score correlation matching, Spearman's correlation ( $\rho$ ) is calculated between alanine sub-  
345 stitution scores in each pair of AS and DMS data. To avoid influence from the size of AS  
346 datasets, we estimated the  $\rho$  value with the empirical copula, which is related to the standard  
347 estimator by a factor of  $(n-1)/(n+1)$  [128,129]:

$$348 \quad \rho_r := \rho \times \frac{n-1}{n+1}$$

349 where  $\rho_r$  is the regularised correlation coefficient, and  $n$  is the number of alanine substitutions  
350 used for correlation calculation. For each DMS dataset, AS result with the highest  $\rho_r$  was  
351 picked for modelling.

352

#### 353 **9.5 AS data pre-processing**

354 AS data were pre-processed prior to modelling. For variants without available (fil-  
355 tered/matched) AS data, their AS scores were imputed with the mean value of all available AS

356 scores across all studies. Then the AS data were encoded by the wild-type and variant amino  
357 acid type with one-hot-encoding. For each variant, the AS feature is expanded with two one-  
358 hot vectors. Each of the vectors has 19 zeros and one non-zero value which was the AS score,  
359 with the location of the non-zero value indicating the wild-type or variant amino acid type.

360

## 361 **9.6 Training and evaluation of DMS score predictor**

362 To build the predictors, we performed linear regression using the function `sklearn.lin-`  
363 `ear_model.LinearRegression` from scikit-learn [130]. Training and validation data  
364 were separated with leave-one-protein-out cross-validation. In this process, data from one pro-  
365 tein were withheld for subsequent validation, and the rest were used for training. This process  
366 was iterated over all proteins in the data. Variants were inversely weighted during the training  
367 process by the number of measurements available, thus compensating for some regions having  
368 greater coverage with DMS and AS assays. Predictors were trained on protein features, DMS  
369 data and (optionally) AS data using four different filtering or matching strategies: i) all  
370 DMS/AS data, ii) compatibility-filtered DMS/AS data, iii) correlation-matched DMS/AS data,  
371 and iv) a control, constructed using DMS data only.

372 In the evaluation process, let  $V$  be protein variants assayed by both DMS study  $D$  and AS study  
373  $A$ . Variant scores are predicted by the previously mentioned predictors either using AS data  
374 ( $\hat{s}_V^A$ ) or not ( $\hat{s}_V$ ). Spearman's correlation ( $\rho$ ) was calculated between the DMS scores  $s_V^D$  and  
375 each set of predicted scores. The difference of  $\rho$  was used to evaluate the performance change  
376 ( $\Delta\rho_V$ ).

$$377 \quad \rho_V^A = \text{Spearman's correlation}(\hat{s}_V^A, s_V^D)$$

$$378 \quad \rho_V = \text{Spearman's correlation}(\hat{s}_V, s_V^D)$$

$$379 \quad \Delta\rho_V = \rho_V^A - \rho_V$$

380 To evaluate, we iterated over variants from each pair of DMS/AS studies. Results were dropped  
381 for variants  $V$  with only one protein residue available during analysis and visualization. Model  
382 performance was compared using the following statistical tests. Results in Fig 5 & Fig S5 were  
383 tested with Welch's test, and results in Fig S4 & Fig S6 were tested with paired t-tests. The p-  
384 values were jointly corrected using the Holm-Šidák method. The 95% confidence interval of  
385 median values are calculated by Gaussian-based asymptotic approximation [131].

386

### 387 **9.7 Prediction with other variant effect predictors**

388 For PROVEAN [132] and SIFT [133], prediction results on target variants were directly down-  
389 loaded from the pre-calculated database for PROVEAN. For PolyPhen-2 [134] and GEMME  
390 [135], variant scores were computed through their online toolkits, using the default settings.  
391 ESM-1v [136] was set up locally and run according to its examples and documentations. EVE  
392 [137] results were collected from their pre-calculated database and a benchmarking study [138].

393

## 394 **10 References**

- 395 1. Fowler DM, Fields S. Deep mutational scanning: a new style of protein science. *Nature*  
396 *Methods*. 2014; doi: 10.1038/nmeth.3027.
- 397 2. Findlay GM. Linking genome variants to disease: scalable approaches to test the functional  
398 impact of human mutations. *Human Molecular Genetics*. 2021; doi: 10.1093/hmg/ddab219.
- 399 3. Geck RC, Boyle G, Amorosi CJ, Fowler DM, Dunham MJ. Measuring Pharmacogene Var-  
400 iant Function at Scale Using Multiplexed Assays. *Annual Review of Pharmacology and Toxi-*  
401 *cology*. 2022; doi: 10.1146/annurev-pharmtox-032221-085807.

- 402 4. Weile J, Roth FP. Multiplexed assays of variant effects contribute to a growing genotype–  
403 phenotype atlas. *Hum Genet.* 2018; doi: 10.1007/s00439-018-1916-x.
- 404 5. Diss G, Lehner B. The genetic landscape of a physical interaction. *eLife.* 2018; doi:  
405 10.7554/eLife.32472.
- 406 6. Fowler DM, Araya CL, Fleishman SJ, Kellogg EH, Stephany JJ, Baker D, et al.. High-reso-  
407 lution mapping of protein sequence-function relationships. *Nature Methods.* 2010; doi:  
408 10.1038/nmeth.1492.
- 409 7. Amorosi CJ, Chiasson MA, McDonald MG, Wong LH, Sitko KA, Boyle G, et al.. Massively  
410 parallel characterization of CYP2C9 variant enzyme activity and abundance. *The American*  
411 *Journal of Human Genetics.* 2021; doi: 10.1016/j.ajhg.2021.07.001.
- 412 8. Faure AJ, Domingo J, Schmiedel JM, Hidalgo-Carcedo C, Diss G, Lehner B. Mapping the  
413 energetic and allosteric landscapes of protein binding domains. *Nature.* 2022; doi:  
414 10.1038/s41586-022-04586-4.
- 415 9. Matreyek KA, Starita LM, Stephany JJ, Martin B, Chiasson MA, Gray VE, et al.. Multiplex  
416 assessment of protein variant abundance by massively parallel sequencing. *Nature Genetics.*  
417 2018; doi: 10.1038/s41588-018-0122-z.
- 418 10. Mighell TL, Evans-Dutson S, O’Roak BJ. A Saturation Mutagenesis Approach to Under-  
419 standing PTEN Lipid Phosphatase Activity and Genotype-Phenotype Relationships. *The Amer-*  
420 *ican Journal of Human Genetics.* 2018; doi: 10.1016/j.ajhg.2018.03.018.
- 421 11. Stiffler MA, Hekstra DR, Ranganathan R. Evolvability as a Function of Purifying Selection  
422 in TEM-1  $\beta$ -Lactamase. *Cell.* 2015; doi: 10.1016/j.cell.2015.01.035.

- 423 12. Ahler E, Register AC, Chakraborty S, Fang L, Dieter EM, Sitko KA, et al.. A Combined  
424 Approach Reveals a Regulatory Mechanism Coupling Src's Kinase Activity, Localization, and  
425 Phosphotransferase-Independent Functions. *Molecular Cell*. 2019; doi: 10.1016/j.mol-  
426 cel.2019.02.003.
- 427 13. Giacomelli AO, Yang X, Lintner RE, McFarland JM, Duby M, Kim J, et al.. Mutational  
428 processes shape the landscape of TP53 mutations in human cancer. *Nature Genetics*. Nature  
429 Publishing Group; 2018; doi: 10.1038/s41588-018-0204-y.
- 430 14. Roscoe BP, Thayer KM, Zeldovich KB, Fushman D, Bolon DNA. Analyses of the Effects  
431 of All Ubiquitin Point Mutants on Yeast Growth Rate. *Journal of Molecular Biology*. 2013;  
432 doi: 10.1016/j.jmb.2013.01.032.
- 433 15. Tabet D, Parikh V, Mali P, Roth FP, Claussnitzer M. Scalable Functional Assays for the  
434 Interpretation of Human Genetic Variation. *Annu Rev Genet*. 2022; doi: 10.1146/annurev-  
435 genet-072920-032107.
- 436 16. Kuang D, Weile J, Kishore N, Nguyen M, Rubin AF, Fields S, et al.. MaveRegistry: a  
437 collaboration platform for multiplexed assays of variant effect. Lu Z, editor. *Bioinformatics*.  
438 2021; doi: 10.1093/bioinformatics/btab215.
- 439 17. Gray VE, Hause RJ, Luebeck J, Shendure J, Fowler DM. Quantitative Missense Variant  
440 Effect Prediction Using Large-Scale Mutagenesis Data. *Cell Systems*. 2018; doi:  
441 10.1016/j.cels.2017.11.003.
- 442 18. Alley EC, Khimulya G, Biswas S, AlQuraishi M, Church GM. Unified rational protein  
443 engineering with sequence-based deep representation learning. *Nat Methods*. 2019; doi:  
444 10.1038/s41592-019-0598-1.



- 445 19. Munro D, Singh M. DeMaSk: a deep mutational scanning substitution matrix and its use  
446 for variant impact prediction. Xu J, editor. *Bioinformatics*. 2020; doi: 10.1093/bioinformat-  
447 ics/btaa1030.
- 448 20. Biswas S, Khimulya G, Alley EC, Esvelt KM, Church GM. Low- N protein engineering  
449 with data-efficient deep learning. *Nature Methods*. Nature Publishing Group; 2021; doi:  
450 10.1038/s41592-021-01100-y.
- 451 21. Høie MH, Cagiada M, Beck Frederiksen AH, Stein A, Lindorff-Larsen K. Predicting and  
452 interpreting large-scale mutagenesis data using analyses of protein stability and conservation.  
453 *Cell Reports*. 2022; doi: 10.1016/j.celrep.2021.110207.
- 454 22. Wu Y, Li R, Sun S, Weile J, Roth FP. Improved pathogenicity prediction for rare human  
455 missense variants. *The American Journal of Human Genetics*. 2021; doi:  
456 10.1016/j.ajhg.2021.08.012.
- 457 23. Hsu C, Nisonoff H, Fannjiang C, Listgarten J. Learning protein fitness models from evolu-  
458 tionary and assay-labeled data. *Nat Biotechnol*. 2022; doi: 10.1038/s41587-021-01146-5.
- 459 24. Findlay GM, Daza RM, Martin B, Zhang MD, Leith AP, Gasperini M, et al.. Accurate  
460 classification of BRCA1 variants with saturation genome editing. *Nature*. 2018; doi:  
461 10.1038/s41586-018-0461-z.
- 462 25. Cagiada M, Bottaro S, Lindemose S, Schenstrøm SM, Stein A, Hartmann-Petersen R, et  
463 al.. Discovering functionally important sites in proteins. bioRxiv;

- 464 26. Block C, Janknecht R, Herrmann C, Nassar N, Wittinghofer A. Quantitative structure-ac-  
465 tivity analysis correlating Ras/Raf interaction in vitro to Raf activation in vivo. *Nature Struc-*  
466 *tural Biology*. Nature Publishing Group; 1996; doi: 10.1038/nsb0396-244.
- 467 27. Sloan DJ, Hellenga HW. Dissection of the protein G B1 domain binding site for human IgG  
468 Fc fragment. *Protein Science*. 1999; doi: 10.1110/ps.8.8.1643.
- 469 28. Fleming KG, Engelman DM. Specificity in transmembrane helix–helix interactions can  
470 define a hierarchy of stability for sequence variants. *PNAS*. National Academy of Sciences;  
471 2001; doi: 10.1073/pnas.251367498.
- 472 29. Shibata Y, White JF, Serrano-Vega MJ, Magnani F, Aloia AL, Grisshammer R, et al..  
473 Thermostabilization of the Neurotensin Receptor NTS1. *Journal of Molecular Biology*. 2009;  
474 doi: 10.1016/j.jmb.2009.04.068.
- 475 30. Brzovic PS, Heikaus CC, Kisselev L, Vernon R, Herbig E, Pacheco D, et al.. The Acidic  
476 Transcription Activator Gcn4 Binds the Mediator Subunit Gal11/Med15 Using a Simple Pro-  
477 tein Interface Forming a Fuzzy Complex. *Molecular Cell*. 2011; doi: 10.1016/j.mol-  
478 cel.2011.11.008.
- 479 31. Gajula KS, Huwe PJ, Mo CY, Crawford DJ, Stivers JT, Radhakrishnan R, et al.. High-  
480 throughput mutagenesis reveals functional determinants for DNA targeting by activation-in-  
481 duced deaminase. *Nucleic Acids Research*. 2014; doi: 10.1093/nar/gku689.
- 482 32. Kortemme T, Kim DE, Baker D. Computational Alanine Scanning of Protein-Protein In-  
483 terfaces. *Science's STKE*. American Association for the Advancement of Science; 2004; doi:  
484 10.1126/stke.2192004pl2.

- 485 33. Morrison KL, Weiss GA. Combinatorial alanine-scanning. *Current Opinion in Chemical*  
486 *Biology*. 2001; doi: 10.1016/S1367-5931(00)00206-4.
- 487 34. Cunningham BC, Wells JA. High-resolution epitope mapping of hGH-receptor interactions  
488 by alanine-scanning mutagenesis. *Science*. American Association for the Advancement of Sci-  
489 ence; 1989; doi: 10.1126/science.2471267.
- 490 35. DeLano WL. Unraveling hot spots in binding interfaces: progress and challenges. *Current*  
491 *Opinion in Structural Biology*. 2002; doi: 10.1016/S0959-440X(02)00283-X.
- 492 36. Eustache S, Leprince J, Tufféry P. Progress with peptide scanning to study structure-activ-  
493 ity relationships: the implications for drug discovery. *Expert Opinion on Drug Discovery*. 2016;  
494 doi: 10.1080/17460441.2016.1201058.
- 495 37. Olson CA, Wu NC, Sun R. A Comprehensive Biophysical Description of Pairwise Epistasis  
496 throughout an Entire Protein Domain. *Current Biology*. 2014; doi: 10.1016/j.cub.2014.09.072.
- 497 38. Staller MV, Holehouse AS, Swain-Lenz D, Das RK, Pappu RV, Cohen BA. A High-  
498 Throughput Mutational Scan of an Intrinsically Disordered Acidic Transcriptional Activation  
499 Domain. *Cell Systems*. 2018; doi: 10.1016/j.cels.2018.01.015.
- 500 39. Gray VE, Sitko K, Kameni FZN, Williamson M, Stephany JJ, Hasle N, et al.. Elucidating  
501 the Molecular Determinants of A $\beta$  Aggregation with Deep Mutational Scanning. *G3 (Be-*  
502 *thesda)*. 2019; doi: 10.1534/g3.119.400535.
- 503 40. Esposito D, Weile J, Shendure J, Starita LM, Papenfuss AT, Roth FP, et al.. MaveDB: an  
504 open-source platform to distribute and interpret data from multiplexed assays of variant effect.  
505 *Genome Biol*. 2019; doi: 10.1186/s13059-019-1845-6.

- 506 41. Rubin AF, Min JK, Rollins NJ, Da EY, Esposito D, Harrington M, et al.. MaveDB v2: a  
507 curated community database with over three million variant effects from multiplexed func-  
508 tional assays. bioRxiv;
- 509 42. Heredia JD, Park J, Brubaker RJ, Szymanski SK, Gill KS, Procko E. Mapping Interaction  
510 Sites on Human Chemokine Receptors by Deep Mutational Scanning. *The Journal of Immu-*  
511 *nology*. American Association of Immunologists; 2018; doi: 10.4049/jimmunol.1800343.
- 512 43. Tian S, Choi W-T, Liu D, Pesavento J, Wang Y, An J, et al.. Distinct Functional Sites for  
513 Human Immunodeficiency Virus Type 1 and Stromal Cell-Derived Factor 1 $\alpha$  on CXCR4  
514 Transmembrane Helical Domains. *JVI*. 2005; doi: 10.1128/JVI.79.20.12667-12673.2005.
- 515 44. Chabot DJ, Zhang P-F, Quinnan GV, Broder CC. Mutagenesis of CXCR4 Identifies Im-  
516 portant Domains for Human Immunodeficiency Virus Type 1 X4 Isolate Envelope-Mediated  
517 Membrane Fusion and Virus Entry and Reveals Cryptic Coreceptor Activity for R5 Isolates. *J*  
518 *Virol*. 1999; doi: 10.1128/JVI.73.8.6598-6609.1999.
- 519 45. Han DP, Penn-Nicholson A, Cho MW. Identification of critical determinants on ACE2 for  
520 SARS-CoV entry and development of a potent entry inhibitor. *Virology*. 2006; doi:  
521 10.1016/j.virol.2006.01.029.
- 522 46. Fujita–Yoshigaki J, Shirouzu M, Ito Y, Hattori S, Furuyama S, Nishimura S, et al.. A Con-  
523 stitutive Effector Region on the C-terminal Side of Switch I of the Ras Protein. *J Biol Chem*.  
524 American Society for Biochemistry and Molecular Biology; 1995; doi: 10.1074/jbc.270.9.4661.
- 525 47. Gray VE, Hause RJ, Fowler DM. Analysis of Large-Scale Mutagenesis Data To Assess the  
526 Impact of Single Amino Acid Substitutions. *Genetics*. 2017; doi: 10.1534/genetics.117.300064.

527 48. Hidalgo P, Ansari AZ, Schmidt P, Hare B, Simkovich N, Farrell S, et al.. Recruitment of  
528 the transcriptional machinery through GAL11P: structure and interactions of the GAL4 dimer-  
529 ization domain. *Genes Dev.* 2001; doi: 10.1101/gad.873901.

530 49. Rodríguez-Escudero I, Oliver MD, Andrés-Pons A, Molina M, Cid VJ, Pulido R. A com-  
531 prehensive functional analysis of PTEN mutations: implications in tumor- and autism-related  
532 syndromes. *Human Molecular Genetics.* 2011; doi: 10.1093/hmg/ddr337.

533 50. Schröter C, Günther R, Rhiel L, Becker S, Toleikis L, Doerner A, et al.. A generic approach  
534 to engineer antibody pH-switches using combinatorial histidine scanning libraries and yeast  
535 display. *mAbs.* 2015; doi: 10.4161/19420862.2014.985993.

536 51. Starace DM, Bezanilla F. Histidine Scanning Mutagenesis of Basic Residues of the S4  
537 Segment of the Shaker K<sup>+</sup> Channel. *J Gen Physiol.* 117:469–902001;

538 52. Cagiada M, Johansson KE, Valanciute A, Nielsen SV, Hartmann-Petersen R, Yang JJ, et  
539 al.. Understanding the Origins of Loss of Protein Function by Analyzing the Effects of Thou-  
540 sands of Variants on Activity and Abundance. Ozkan B, editor. *Molecular Biology and Evolu-*  
541 *tion.* 2021; doi: 10.1093/molbev/msab095.

542 53. Jepsen MM, Fowler DM, Hartmann-Petersen R, Stein A, Lindorff-Larsen K. Chapter 5 -  
543 Classifying disease-associated variants using measures of protein activity and stability. In: Pey  
544 AL, editor. *Protein Homeostasis Diseases.* Academic Press;

545 54. Matreyek KA, Stephany JJ, Ahler E, Fowler DM. Integrating thousands of PTEN variant  
546 activity and abundance measurements reveals variant subgroups and new dominant negatives  
547 in cancers. *Genome Med.* 2021; doi: 10.1186/s13073-021-00984-x.

548 55. Mighell TL, Thacker S, Fombonne E, Eng C, O’Roak BJ. An Integrated Deep-Mutational-  
549 Scanning Approach Provides Clinical Insights on PTEN Genotype-Phenotype Relationships.  
550 *The American Journal of Human Genetics*. 2020; doi: 10.1016/j.ajhg.2020.04.014.

551 56. Nielsen SV, Hartmann-Petersen R, Stein A, Lindorff-Larsen K. Multiplexed assays reveal  
552 effects of missense variants in MSH2 and cancer predisposition. *PLOS Genetics*. Public Li-  
553 brary of Science; 2021; doi: 10.1371/journal.pgen.1009496.

554 57. The UniProt Consortium, Bateman A, Martin M-J, Orchard S, Magrane M, Agivetova R,  
555 et al.. UniProt: the universal protein knowledgebase in 2021. *Nucleic Acids Research*. 2021;  
556 doi: 10.1093/nar/gkaa1100.

557 58. Andrews B, Fields S. Distinct patterns of mutational sensitivity for  $\lambda$  resistance and malto-  
558 dextrin transport in *Escherichia coli* LamB. *Microb Genom*. 2020; doi:  
559 10.1099/mgen.0.000364.

560 59. Bandaru P, Shah NH, Bhattacharyya M, Barton JP, Kondo Y, Cofsky JC, et al.. Decon-  
561 struction of the Ras switching cycle through saturation mutagenesis. *eLife*. 2017; doi:  
562 10.7554/eLife.27810.

563 60. Bolognesi B, Faure AJ, Seuma M, Schmiedel JM, Tartaglia GG, Lehner B. The mutational  
564 landscape of a prion-like domain. *Nat Commun*. 2019; doi: 10.1038/s41467-019-12101-z.

565 61. Bridgford JL, Lee SM, Lee CMM, Guglielmelli P, Rumi E, Pietra D, et al.. Novel drivers  
566 and modifiers of MPL-dependent oncogenic transformation identified by deep mutational scan-  
567 ning. *Blood*. American Society of Hematology; 2020; doi: 10.1182/blood.2019002561.

- 568 62. Chan KK, Dorosky D, Sharma P, Abbasi SA, Dye JM, Kranz DM, et al.. Engineering hu-  
569 man ACE2 to optimize binding to the spike protein of SARS coronavirus 2. *Science*. American  
570 Association for the Advancement of Science; 2020; doi: 10.1126/science.abc0870.
- 571 63. Chiasson MA, Rollins NJ, Stephany JJ, Sitko KA, Matreyek KA, Verby M, et al.. Multi-  
572 plexed measurement of variant abundance and activity reveals VKOR topology, active site and  
573 human variant impact. *Elife*. 2020; doi: 10.7554/eLife.58026.
- 574 64. Elazar A, Weinstein J, Biran I, Fridman Y, Bibi E, Fleishman SJ. Mutational scanning  
575 reveals the determinants of protein insertion and association energetics in the plasma mem-  
576 brane. Shan Y, editor. *eLife*. eLife Sciences Publications, Ltd; 2016; doi: 10.7554/eLife.12125.
- 577 65. Firnberg E, Labonte JW, Gray JJ, Ostermeier M. A Comprehensive, High-Resolution Map  
578 of a Gene's Fitness Landscape. *Mol Biol Evol*. 2014; doi: 10.1093/molbev/msu081.
- 579 66. Hietpas RT, Jensen JD, Bolon DNA. Experimental illumination of a fitness landscape. *Pro-*  
580 *ceedings of the National Academy of Sciences*. 2011; doi: 10.1073/pnas.1016024108.
- 581 67. Hietpas RT, Bank C, Jensen JD, Bolon DNA. Shifting fitness landscapes in response to  
582 altered environments. *Evolution*. 2013; doi: 10.1111/evo.12207.
- 583 68. Jiang L, Mishra P, Hietpas RT, Zeldovich KB, Bolon DNA. Latent Effects of Hsp90 Mu-  
584 tants Revealed at Reduced Expression Levels. *PLOS Genetics*. Public Library of Science; 2013;  
585 doi: 10.1371/journal.pgen.1003600.
- 586 69. Jiang RJ. Exhaustive Mapping of Missense Variation in Coronary Heart Disease-related  
587 Genes [Thesis]. University of Toronto;

- 588 70. Keskin A, Akdoğan E, Dunn CD. Evidence for Amino Acid Snorkeling from a High-Res-  
589 olution, *In Vivo* Analysis of Fis1 Tail-Anchor Insertion at the Mitochondrial Outer Membrane.  
590 *Genetics*. 2017; doi: 10.1534/genetics.116.196428.
- 591 71. Kitzman JO, Starita LM, Lo RS, Fields S, Shendure J. Massively parallel single-amino-  
592 acid mutagenesis. *Nat Methods*. 2015; doi: 10.1038/nmeth.3223.
- 593 72. Kotler E, Shani O, Goldfeld G, Lotan-Pompan M, Tarcic O, Gershoni A, et al.. A System-  
594 atic p53 Mutation Library Links Differential Functional Impact to Cancer Mutation Pattern and  
595 Evolutionary Conservation. *Molecular Cell*. Elsevier; 2018; doi: 10.1016/j.mol-  
596 cel.2018.06.012.
- 597 73. Kowalsky CA, Whitehead TA. Determination of binding affinity upon mutation for type I  
598 dockerin–cohesin complexes from *Clostridium thermocellum* and *Clostridium cellulolyticum*  
599 using deep sequencing. *Proteins: Structure, Function, and Bioinformatics*. 2016; doi:  
600 10.1002/prot.25175.
- 601 74. McLaughlin Jr RN, Poelwijk FJ, Raman A, Gosal WS, Ranganathan R. The spatial archi-  
602 tecture of protein function and adaptation. *Nature*. 2012; doi: 10.1038/nature11500.
- 603 75. Melamed D, Young DL, Gamble CE, Miller CR, Fields S. Deep mutational scanning of an  
604 RRM domain of the *Saccharomyces cerevisiae* poly(A)-binding protein. *RNA*. 2013; doi:  
605 10.1261/rna.040709.113.
- 606 76. Mishra P, Flynn JM, Starr TN, Bolon DNA. Systematic Mutant Analyses Elucidate General  
607 and Client-Specific Aspects of Hsp90 Function. *Cell Reports*. 2016; doi:  
608 10.1016/j.celrep.2016.03.046.



609 77. Nedrud D, Coyote-Maestas W, Schmidt D. A large-scale survey of pairwise epistasis re-  
610 veals a mechanism for evolutionary expansion and specialization of PDZ domains. *Proteins:*  
611 *Structure, Function, and Bioinformatics*. 2021; doi: 10.1002/prot.26067.

612 78. Newberry RW, Arhar T, Costello J, Hartoularos GC, Maxwell AM, Naing ZZC, et al..  
613 Robust Sequence Determinants of  $\alpha$ -Synuclein Toxicity in Yeast Implicate Membrane Binding.  
614 *ACS Chem Biol*. 2020; doi: 10.1021/acscchembio.0c00339.

615 79. Newberry RW, Leong JT, Chow ED, Kampmann M, DeGrado WF. Deep mutational scan-  
616 ning reveals the structural basis for  $\alpha$ -synuclein activity. *Nat Chem Biol*. 2020; doi:  
617 10.1038/s41589-020-0480-6.

618 80. Roscoe BP, Bolon DNA. Systematic Exploration of Ubiquitin Sequence, E1 Activation  
619 Efficiency, and Experimental Fitness in Yeast. *Journal of Molecular Biology*. 2014; doi:  
620 10.1016/j.jmb.2014.05.019.

621 81. Sarkisyan KS, Bolotin DA, Meer MV, Usmanova DR, Mishin AS, Sharonov GV, et al..  
622 Local fitness landscape of the green fluorescent protein. *Nature*. Nature Publishing Group;  
623 2016; doi: 10.1038/nature17995.

624 82. Silverstein RA, Sun S, Verby M, Weile J, Wu Y, Roth FP. A systematic genotype-pheno-  
625 type map for missense variants in the human intellectual disability-associated gene GDI1. bio-  
626 Rxiv;

627 83. Starita LM, Pruneda JN, Lo RS, Fowler DM, Kim HJ, Hiatt JB, et al.. Activity-enhancing  
628 mutations in an E3 ubiquitin ligase identified by high-throughput mutagenesis. *PNAS*. 2013;  
629 doi: 10.1073/pnas.1303309110.

- 630 84. Starita LM, Young DL, Islam M, Kitzman JO, Gullingsrud J, Hause RJ, et al.. Massively  
631 Parallel Functional Analysis of BRCA1 RING Domain Variants. *Genetics*. 2015; doi:  
632 10.1534/genetics.115.175802.
- 633 85. Starita LM, Islam MM, Banerjee T, Adamovich AI, Gullingsrud J, Fields S, et al.. A Mul-  
634 tiplex Homology-Directed DNA Repair Assay Reveals the Impact of More Than 1,000 BRCA1  
635 Missense Substitution Variants on Protein Function. *The American Journal of Human Genetics*.  
636 2018; doi: 10.1016/j.ajhg.2018.07.016.
- 637 86. Suiter CC, Moriyama T, Matreyek KA, Yang W, Scaletti ER, Nishii R, et al.. Massively  
638 parallel variant characterization identifies *NUDT15* alleles associated with thiopurine toxicity.  
639 *Proc Natl Acad Sci USA*. 2020; doi: 10.1073/pnas.1915680117.
- 640 87. Sun S, Weile J, Verby M, Wu Y, Wang Y, Cote AG, et al.. A proactive genotype-to-patient-  
641 phenotype map for cystathionine beta-synthase. *Genome Med*. 2020; doi: 10.1186/s13073-020-  
642 0711-1.
- 643 88. Thompson S, Zhang Y, Ingle C, Reynolds KA, Kortemme T. Altered expression of a quality  
644 control protease in *E. coli* reshapes the in vivo mutational landscape of a model enzyme. *eLife*.  
645 2020; doi: 10.7554/eLife.53476.
- 646 89. Trenker R, Wu X, Nguyen JV, Wilcox S, Rubin AF, Call ME, et al.. Human and viral  
647 membrane-associated E3 ubiquitin ligases MARCH1 and MIR2 recognize different features  
648 of CD86 to downregulate surface expression. *Journal of Biological Chemistry*. Elsevier; 2021;  
649 doi: 10.1016/j.jbc.2021.100900.
- 650 90. Weile J, Sun S, Cote AG, Knapp J, Verby M, Mellor JC, et al.. A framework for exhaust-  
651 ively mapping functional missense variants. *Mol Syst Biol*. 2017; doi: 10.15252/msb.20177908.

652 91. Weile J, Kishore N, Sun S, Maaieh R, Verby M, Li R, et al.. Shifting landscapes of human  
653 MTHFR missense-variant effects. *The American Journal of Human Genetics*. Elsevier; 2021;  
654 doi: 10.1016/j.ajhg.2021.05.009.

655 92. Wrenbeck EE, Bedewitz MA, Klesmith JR, Noshin S, Barry CS, Whitehead TA. An Auto-  
656 mated Data-Driven Pipeline for Improving Heterologous Enzyme Expression. *ACS Synth Biol*.  
657 American Chemical Society; 2019; doi: 10.1021/acssynbio.8b00486.

658 93. Zhang L, Sarangi V, Moon I, Yu J, Liu D, Devarajan S, et al.. CYP2C9 and CYP2C19:  
659 Deep Mutational Scanning and Functional Characterization of Genomic Missense Variants.  
660 *Clinical and Translational Science*. 2020; doi: <https://doi.org/10.1111/cts.12758>.

661 94. Zinkus-Boltz J, DeValk C, Dickinson BC. A Phage-Assisted Continuous Selection Ap-  
662 proach for Deep Mutational Scanning of Protein–Protein Interactions. *ACS Chem Biol*. Amer-  
663 ican Chemical Society; 2019; doi: 10.1021/acscchembio.9b00669.

664 95. Bernier-Villamor V, Sampson DA, Matunis MJ, Lima CD. Structural Basis for E2-Medi-  
665 ated SUMO Conjugation Revealed by a Complex between Ubiquitin-Conjugating Enzyme  
666 Ubc9 and RanGAP. *Cell*. 108:122002;

667 96. Blanpain C, Doranz BJ, Vakili J, Rucker J, Govaerts C, Baik SSW, et al.. Multiple Charged  
668 and Aromatic Residues in CCR5 Amino-terminal Domain Are Involved in High Affinity Bind-  
669 ing of Both Chemokines and HIV-1 Env Protein. *J Biol Chem*. 1999; doi:  
670 10.1074/jbc.274.49.34719.

671 97. Brzovic PS, Keeffe JR, Nishikawa H, Miyamoto K, Fox D, Fukuda M, et al.. Binding and  
672 recognition in the assembly of an active BRCA1/BARD1 ubiquitin-ligase complex. *Proceed-*  
673 *ings of the National Academy of Sciences*. 2003; doi: 10.1073/pnas.0836054100.

674 98. Chen S, Wu J, Zhong S, Li Y, Zhang P, Ma J, et al.. iASPP mediates p53 selectivity through  
675 a modular mechanism fine-tuning DNA recognition. *Proc Natl Acad Sci USA*. 2019; doi:  
676 10.1073/pnas.1909393116.

677 99. Chupreta S, Holmstrom S, Subramanian L, Iñiguez-Lluhí JA. A Small Conserved Surface  
678 in SUMO Is the Critical Structural Determinant of Its Transcriptional Inhibitory Properties.  
679 *MCB*. 2005; doi: 10.1128/MCB.25.10.4272-4282.2005.

680 100. Cobb JA, Roberts DM. Structural Requirements for N-Trimethylation of Lysine 115 of  
681 Calmodulin. *Journal of Biological Chemistry*. 2000; doi: 10.1074/jbc.M002332200.

682 101. Coyne RS, McDonald HB, Edgemon K, Brody LC. Functional Characterization of  
683 BRCA1 Sequence Variants using a Yeast Small Colony Phenotype Assay. *Cancer Biology &*  
684 *Therapy*. 2004; doi: 10.4161/cbt.3.5.809.

685 102. Denker K, Orlik F, Schiffler B, Benz R. Site-directed Mutagenesis of the Greasy Slide  
686 Aromatic Residues Within the LamB (Maltoporin) Channel of Escherichia coli: Effect on Ion  
687 and Maltopentaose Transport. *Journal of Molecular Biology*. 2005; doi:  
688 10.1016/j.jmb.2005.07.025.

689 103. Dragic T, Trkola A, Lin SW, Nagashima KA, Kajumo F, Zhao L, et al.. Amino-Terminal  
690 Substitutions in the CCR5 Coreceptor Impair gp120 Binding and Human Immunodeficiency  
691 Virus Type 1 Entry. *J Virol*. 1998; doi: 10.1128/JVI.72.1.279-285.1998.

692 104. Dragic T, Trkola A, Thompson DAD, Cormier EG, Kajumo FA, Maxwell E, et al.. A  
693 binding pocket for a small molecule inhibitor of HIV-1 entry within the transmembrane helices  
694 of CCR5. *Proceedings of the National Academy of Sciences*. 2000; doi:  
695 10.1073/pnas.090576697.

- 696 105. Ecsédi P, Gógl G, Hóf H, Kiss B, Harmat V, Nyitray L. Structure Determination of the  
697 Transactivation Domain of p53 in Complex with S100A4 Using Annexin A2 as a Crystalliza-  
698 tion Chaperone. *Structure*. 2020; doi: 10.1016/j.str.2020.05.001.
- 699 106. Kopecká J, Krijt J, Raková K, Kožich V. Restoring assembly and activity of cystathionine  
700  $\beta$ -synthase mutants by ligands and chemical chaperones. *Journal of Inherited Metabolic Dis-*  
701 *ease*. 2011; doi: 10.1007/s10545-010-9087-5.
- 702 107. Kožich V, Sokolová J, Klatovská V, Krijt J, Janošík M, Jelínek K, et al.. Cystathionine  $\beta$ -  
703 synthase mutations: effect of mutation topology on folding and activity. *Hum Mutat*. 2010; doi:  
704 10.1002/humu.21273.
- 705 108. Kruger W d., Wang L, Jhee K h., Singh R h., Elsas II L j.. Cystathionine  $\beta$ -synthase defi-  
706 ciency in Georgia (USA): Correlation of clinical and biochemical phenotype with genotype.  
707 *Human Mutation*. 2003; doi: 10.1002/humu.10290.
- 708 109. Lee SY, Pullen L, Virgil DJ, Castañeda CA, Abeykoon D, Bolon DNA, et al.. Alanine  
709 Scan of Core Positions in Ubiquitin Reveals Links between Dynamics, Stability, and Function.  
710 *Journal of Molecular Biology*. 2014; doi: 10.1016/j.jmb.2013.10.042.
- 711 110. Li W, Zhang C, Sui J, Kuhn JH, Moore MJ, Luo S, et al.. Receptor and viral determinants  
712 of SARS-coronavirus adaptation to human ACE2. *EMBO J*. 2005; doi: 10.1038/sj.em-  
713 boj.7600640.
- 714 111. Lin G, Baribaud F, Romano J, Doms RW, Hoxie JA. Identification of gp120 Binding Sites  
715 on CXCR4 by Using CD4-Independent Human Immunodeficiency Virus Type 2 Env Proteins.  
716 *JVI*. 2003; doi: 10.1128/JVI.77.2.931-942.2003.

717 112. Mascle XH, Lussier-Price M, Cappadocia L, Estephan P, Raiola L, Omichinski JG, et al..  
718 Identification of a Non-covalent Ternary Complex Formed by PIAS1, SUMO1, and UBC9  
719 Proteins Involved in Transcriptional Regulation. *Journal of Biological Chemistry*. 2013; doi:  
720 10.1074/jbc.M113.486845.

721 113. Matthews EE, Thévenin D, Rogers JM, Gotow L, Lira PD, Reiter LA, et al.. Thrombo-  
722 poietin receptor activation: transmembrane helix dimerization, rotation, and allosteric modula-  
723 tion. *The FASEB Journal*. 2011; doi: <https://doi.org/10.1096/fj.10-178673>.

724 114. Mayfield JA, Davies MW, Dimster-Denk D, Pleskac N, McCarthy S, Boydston EA, et al..  
725 Surrogate Genetics and Metabolic Profiling for Characterization of Human Disease Alleles.  
726 *Genetics*. 2012; doi: 10.1534/genetics.111.137471.

727 115. Navenot J-M, Wang Z, Trent JO, Murray JL, Hu Q, DeLeeuw L, et al.. Molecular anatomy  
728 of CCR5 engagement by physiologic and viral chemokines and HIV-1 envelope glycoproteins:  
729 differences in primary structural requirements for RANTES, MIP-1 $\alpha$ , and vMIP-II bind-  
730 ing11Edited by P. E. Wright. *Journal of Molecular Biology*. 2001; doi:  
731 10.1006/jmbi.2001.5086.

732 116. Peng L, Damschroder MM, Cook KE, Wu H, Dall'Acqua WF. Molecular basis for the  
733 antagonistic activity of an anti-CXCR4 antibody. *mAbs*. 2016; doi:  
734 10.1080/19420862.2015.1113359.

735 117. Peterson BR, Sun LJ, Verdine GL. A critical arginine residue mediates cooperativity in  
736 the contact interface between transcription factors NFAT and AP-1. *Proceedings of the Na-  
737 tional Academy of Sciences*. 1996; doi: 10.1073/pnas.93.24.13671.

738 118. Rabut GEE, Konner JA, Kajumo F, Moore JP, Dragic T. Alanine Substitutions of Polar  
739 and Nonpolar Residues in the Amino-Terminal Domain of CCR5 Differently Impair Entry of  
740 Macrophage- and Dualtropic Isolates of Human Immunodeficiency Virus Type 1. *J Virol.* 1998;  
741 doi: 10.1128/JVI.72.4.3464-3468.1998.

742 119. Ransburgh DJR, Chiba N, Ishioka C, Toland AE, Parvin JD. Identification of Breast Tu-  
743 mor Mutations in *BRCA1* That Abolish Its Function in Homologous DNA Recombination.  
744 *Cancer Res.* 2010; doi: 10.1158/0008-5472.CAN-09-2850.

745 120. Tan Y, Tong P, Wang J, Zhao L, Li J, Yu Y, et al.. The Membrane-Proximal Region of  
746 C–C Chemokine Receptor Type 5 Participates in the Infection of HIV-1. *Front Immunol.* 2017;  
747 doi: 10.3389/fimmu.2017.00478.

748 121. Towler WI, Zhang J, Ransburgh DJR, Toland AE, Ishioka C, Chiba N, et al.. Analysis of  
749 BRCA1 Variants in Double-Strand Break Repair by Homologous Recombination and Single-  
750 Strand Annealing. *Human Mutation.* 2013; doi: 10.1002/humu.22251.

751 122. Trent JO, Wang Z, Murray JL, Shao W, Tamamura H, Fujii N, et al.. Lipid Bilayer Sim-  
752 ulations of CXCR4 with Inverse Agonists and Weak Partial Agonists. *J Biol Chem.* 2003; doi:  
753 10.1074/jbc.M307850200.

754 123. Van Gelder P, Dumas F, Bartoldus I, Saint N, Prilipov A, Winterhalter M, et al.. Sugar  
755 Transport through Maltoporin of *Escherichia coli* : Role of the Greasy Slide. *J Bacteriol.* 2002;  
756 doi: 10.1128/JB.184.11.2994-2999.2002.

757 124. VanBerkum MF, Means AR. Three amino acid substitutions in domain I of calmodulin  
758 prevent the activation of chicken smooth muscle myosin light chain kinase. *J Biol Chem.* Amer-  
759 ican Society for Biochemistry and Molecular Biology; 266:21488–951991;

- 760 125. Wei Q, Wang L, Wang Q, Kruger WD, Dunbrack RL. Testing computational prediction  
761 of missense mutation phenotypes: Functional characterization of 204 mutations of human  
762 cystathionine beta synthase. *Proteins: Structure, Function, and Bioinformatics*. 2010; doi:  
763 10.1002/prot.22722.
- 764 126. Williams AD, Shivaprasad S, Wetzel R. Alanine Scanning Mutagenesis of A $\beta$ (1-40) Am-  
765 yloid Fibril Stability. *Journal of Molecular Biology*. 2006; doi: 10.1016/j.jmb.2006.01.041.
- 766 127. Zhang J, Rao E, Dioszegi M, Kondru R, DeRosier A, Chan E, et al.. The Second Extra-  
767 cellular Loop of CCR5 Contains the Dominant Epitopes for Highly Potent Anti-Human Immu-  
768 nodeficiency Virus Monoclonal Antibodies. *AAC*. 2007; doi: 10.1128/AAC.01302-06.
- 769 128. Nelsen RB. An introduction to copulas. 2nd ed. New York: Springer;
- 770 129. Bedó J, Ong CS. Multivariate Spearman's rho for aggregating ranks using copulas. *Jour-*  
771 *nal of Machine Learning Research*. arXiv; 2016; doi: 10.48550/ARXIV.1410.4391.
- 772 130. Pedregosa F, Varoquaux G, Gramfort A, Michel V, Thirion B, Grisel O, et al.. Scikit-  
773 learn: Machine Learning in Python. *Journal of machine Learning research*. :2825–30 2011;
- 774 131. Hunter JD. Matplotlib: A 2D Graphics Environment. *Computing in Science & Engineer-*  
775 *ing*. 2007; doi: 10.1109/MCSE.2007.55.
- 776 132. Choi Y, Sims GE, Murphy S, Miller JR, Chan AP. Predicting the Functional Effect of  
777 Amino Acid Substitutions and Indels. de Brevern AG, editor. *PLoS ONE*. 2012; doi:  
778 10.1371/journal.pone.0046688.
- 779 133. Vaser et al.. SIFT missense predictions for genomes. *Nature Protocols*. 2016;



780 134. Adzhubei IA, Schmidt S, Peshkin L, Ramensky VE, Gerasimova A, Bork P, et al.. A  
781 method and server for predicting damaging missense mutations. *Nature Methods*. 2010; doi:  
782 10.1038/nmeth0410-248.

783 135. Laine E, Karami Y, Carbone A. GEMME: A Simple and Fast Global Epistatic Model  
784 Predicting Mutational Effects. *Molecular Biology and Evolution*. 2019; doi: 10.1093/mol-  
785 bev/msz179.

786 136. Meier J, Rao R, Verkuil R, Liu J, Sercu T, Rives A. Language models enable zero-shot  
787 prediction of the effects of mutations on protein function. bioRxiv;

788 137. Frazer J, Notin P, Dias M, Gomez A, Min JK, Brock K, et al.. Disease variant prediction  
789 with deep generative models of evolutionary data. *Nature*. 2021; doi: 10.1038/s41586-021-  
790 04043-8.

791 138. Livesey BJ, Marsh JA. Updated benchmarking of variant effect predictors using deep  
792 mutational scanning. bioRxiv;

793 139. González J, Dai Z, Hennig P, Lawrence ND. Batch Bayesian Optimization via Local Pe-  
794 nalization. arXiv;

795

796 **Supplementary material**

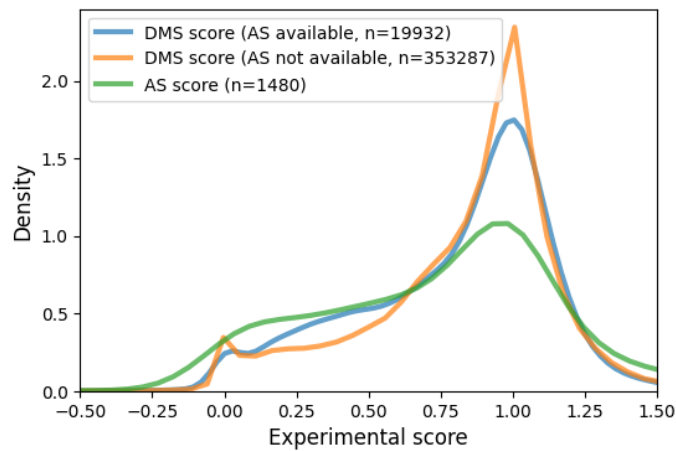

797

798 **Fig S1. DMS and AS score distribution.** The figure shows the kernel estimated density of normalized AS  
 799 scores and DMS scores for variants with or without available AS data.

800

For each **pair** of DMS and AS experiments:

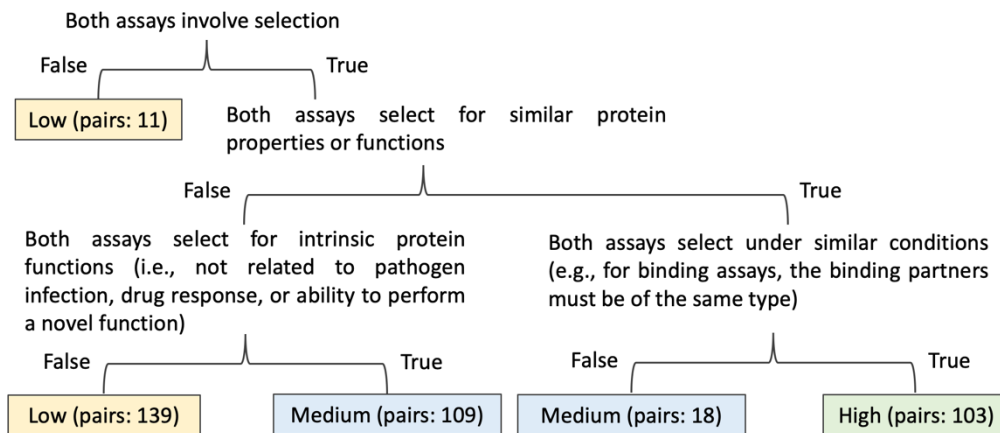

801

802 **Fig S2. Decision tree for classifying DMS and AS assay compatibility.** The similarity of DMS and AS assays  
 803 are compared (Methods) and the DMS/AS assay pairs are classified using three levels of compatibility (low,  
 804 medium, high). The leaf-node text and color show the classified assay compatibility. The number indicates the  
 805 count of assay pairs for each compatibility level.

806

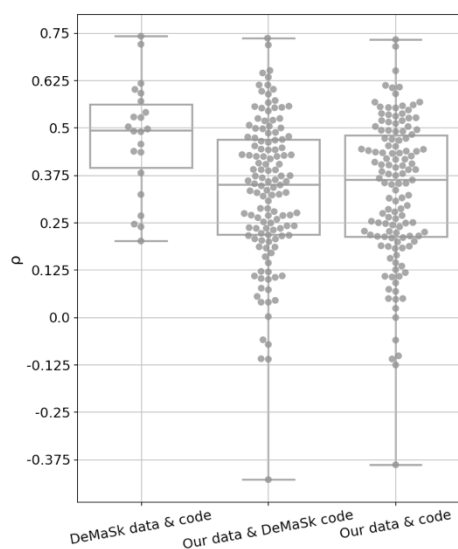

807

808 **Fig S3. Comparison between published and re-implemented predictors.** The plot shows leave-one-protein-  
 809 out cross-validation performance on predictors built from the published DeMaSk code or our code. The predictors  
 810 were trained and evaluated on DMS data either provided by the DeMaSk study or curated by our own. The  
 811 “DeMaSk data & code” result is similar to the published result. For the “Our data & DeMaSk code” result, we  
 812 used our own data and published code which shows a median performance around 0.35. This is probably because  
 813 many more DMS results are included in our data. The similarity of results achieved using “Our data & code”  
 814 demonstrates the correctness of our re-implementation. (Whiskers show the full value range)

815

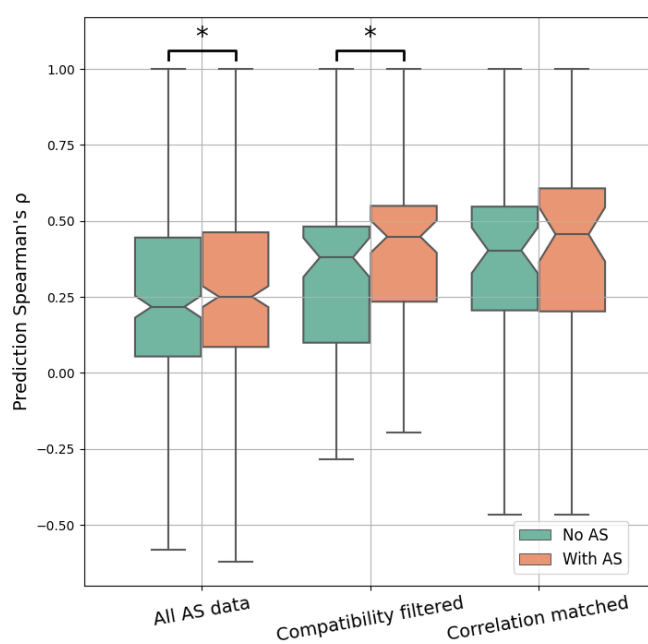

816

817 **Fig S4. Performance comparison between predictors with or without AS data.** The Spearman's  $\rho$  between  
 818 DMS scores and predicted scores for each DMS and AS data pair are shown as box plots. Different approaches  
 819 to filtering the data are shown on the x-axis: "All AS data" used all available data; "Compatibility filtered" used  
 820 only data of high assay compatibility; "Correlation matched" used only data with the highest regularised correla-  
 821 tion for each DMS dataset. The figure does not include data without available AS scores. This means that the  
 822 different results are not directly comparable since they are computed for different subsets of DMS/AS data pairs  
 823 (for example, "All AS data" contains all DMS/AS data pairs, but "Compatibility filtered" contains only data pairs  
 824 of high assay compatibility). Control results are shown as green boxes for predictions on the same residues without  
 825 AS data as a feature. The underlying  $\rho$  for each data pair in the control results is the same, but the boxes are shifted  
 826 due to data filtering. Results for data pairs with only one residue are not shown. P-values were calculated using  
 827 paired t-test and jointly corrected using Holm-Šidák (Methods), \*:  $p < 0.05$ . Notches show the 95% confidence  
 828 interval around the median, and whiskers show the full value range.

829

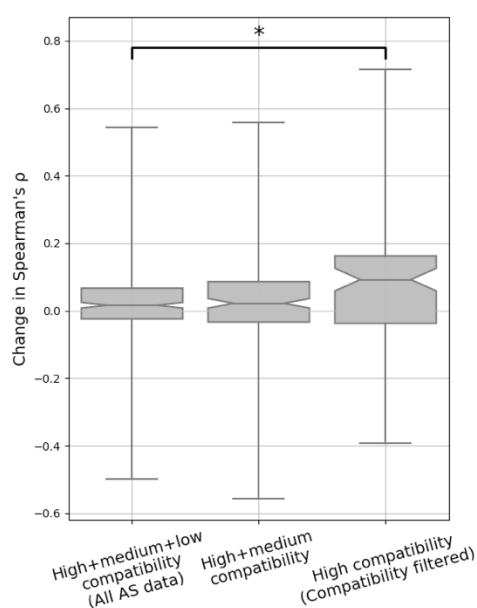

830

831 **Fig S5. The change in prediction performance for using data of different assay compatibility levels.** The  
 832 change of prediction Spearman's  $\rho$  for each DMS and AS data pair is shown as box plots. A higher value represents  
 833 higher prediction accuracy achieved for using AS data. Different data filtering methods are shown on the x-axis.  
 834 Results for data pairs with only one residue are not shown. P-values were calculated using Welch's test and jointly

835 corrected using Holm-Šidák (Methods), \*:  $p < 0.05$ . Notches show the 95% confidence interval around the median,  
836 and whiskers show the full value range.

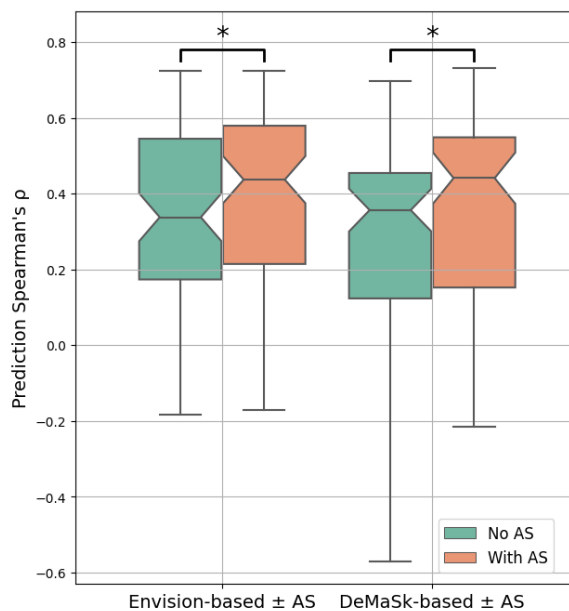

837

838 **Fig S6. Prediction performance is improved while incorporating high compatibility AS data into the En-**

839 **vision model.** The Spearman's  $\rho$  between experiment DMS scores and predicted scores for each DMS/AS assay

840 pair with high compatibility are shown as box plots. The x-axis shows the predictor used, either Envision or

841 DeMaSk. Control results are shown as green boxes for predictions on the same residues without AS data as a

842 feature. Results for data pairs with only one residue are not shown. P-values were calculated using paired t-test

843 and jointly corrected using Holm-Šidák (Methods), \*:  $p < 0.05$ . Notches show the 95% confidence interval around

844 the median, and whiskers show the full value range.

845

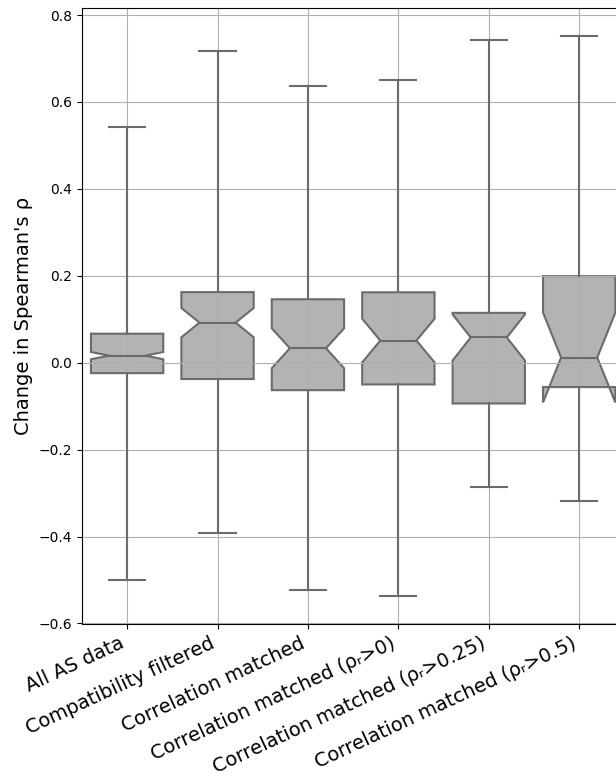

846

847

**Fig S7. Performance improvement on thresholded correlation matching.** The change of prediction  $\rho$  for

848

each DMS and AS data pair is shown as box plots. Different approaches to filtering/matching the data are shown

849

on the x-axis: “All AS data”, “Compatibility filtered” and “Correlation matched” are the same results as previously

850

discussed; while doing correlation matching, a further thresholding (0, 0.25 or 0.5) on the regularized DMS/AS

851

correlation values ( $\rho_r$ ) was applied. Notches show the 95% confidence interval around the median, and whiskers

852

show the full value range.

853

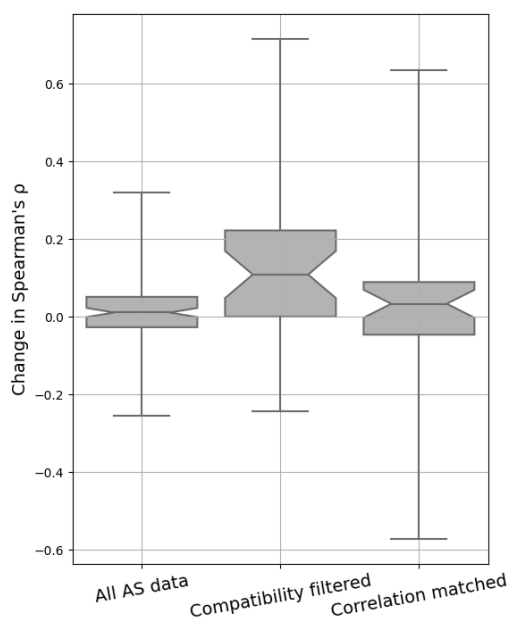

854

855 **Fig S8. Performance improvement on averaged DMS/AS testing data.** This figure shows model perfor-  
 856 mance when we averaged variant scores for DMS or AS data that are: i) published in the same paper; ii) targeting  
 857 the same protein region; iii) measured by the same type of assays (Supplementary Table 1). The change of pre-  
 858 diction  $\rho$  for each averaged DMS and AS data pair is shown. A higher value represents higher prediction accuracy  
 859 achieved when using AS data. Different approaches to filtering/matching the data are shown on the x-axis: “All  
 860 AS data” used all available data; “Compatibility filtered” used only data of high assay compatibility; “Correlation  
 861 matched” used only data with the highest regularised correlation for each DMS dataset. Results for data pairs  
 862 with only one residue are not shown. Notches show the 95% confidence interval around the median, and whiskers  
 863 show the full value range.

864

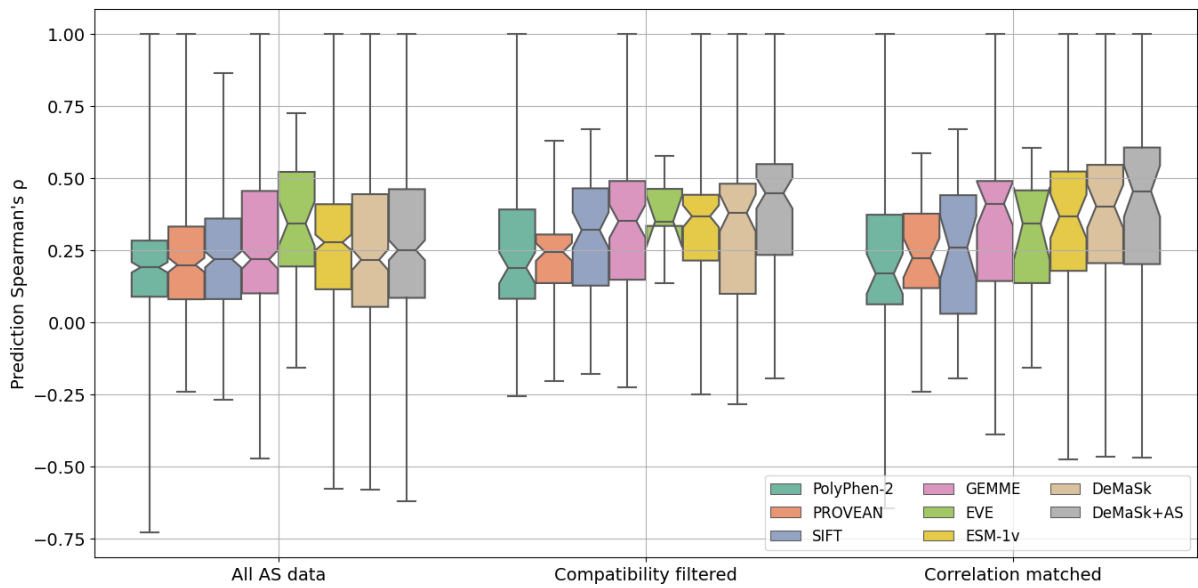

865  
 866 **Fig S9. Model performance on various variant effect predictors.** The Spearman's  $\rho$  between DMS scores  
 867 and predicted scores from different variant effect predictors for each DMS and AS pair are shown as box plots.  
 868 Results are evaluated on different sets of variant data shown on the x-axis: "All AS data" used all available data;  
 869 "Compatibility filtered" used only data of high assay compatibility; "Correlation matched" used only AS data  
 870 with the highest regularised correlation for each DMS dataset. The figure does not include residues without avail-  
 871 able AS scores. Results for data pairs with only one residue are not shown. Notches show the 95% confidence  
 872 interval around the median, and whiskers show the full value range.

873

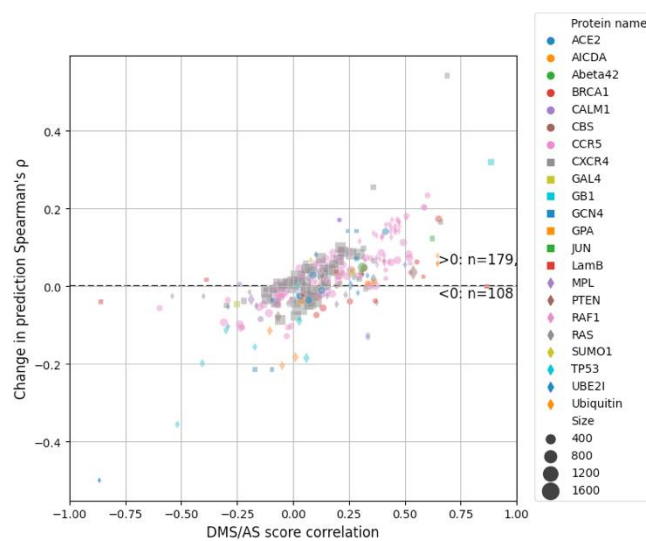

874  
 875 **Fig S10. Prediction performance change for using all AS data.** Each dot represents a DMS/AS data pair. The  
 876 vertical axis shows the change of prediction  $\rho$  by using AS data (larger means higher performance achieved by



877 using AS data). The horizontal axis shows the DMS/AS score correlation for *all* variants on the matched residues  
 878 rather than just alanine substitutions. The colours and shapes of the dots correspond to the target protein, and size  
 879 indicates the number of variants in each data pair. Results for data pairs with only one residue are not shown.  
 880

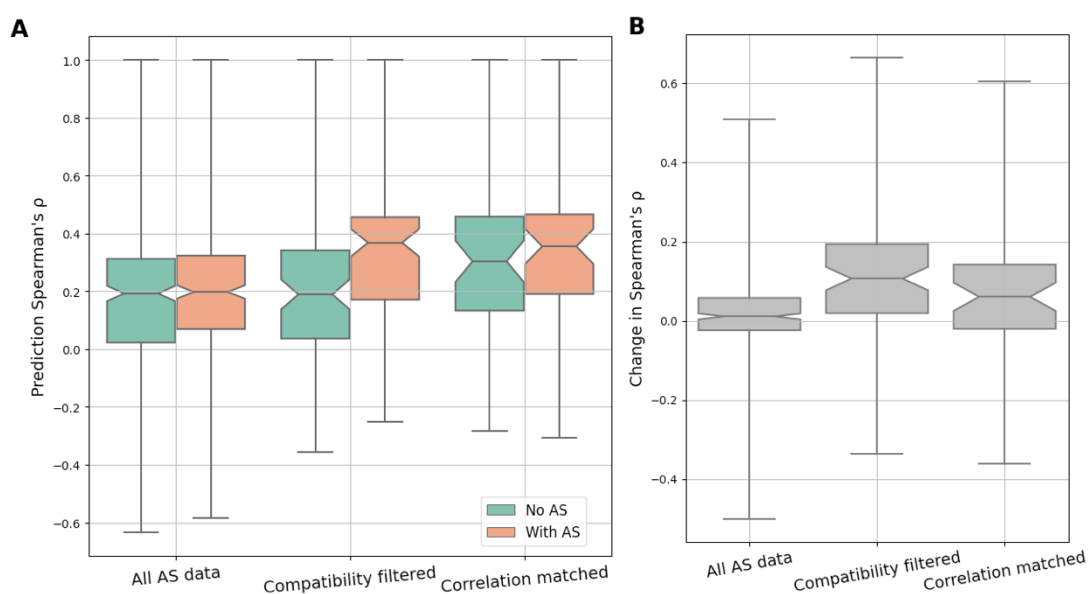

881  
 882 **Fig S11. Model performance for training with AS-data-available-residues.** The predictors were trained only  
 883 on variants that have AS data available. Panel A shows the performance visualized by prediction Spearman's  $\rho$   
 884 for DMS scores and predicted scores for each DMS and AS data pair. Different approaches to filtering the data  
 885 are shown on the x-axis: "All AS data" used all available data; "Compatibility filtered" used only data of high  
 886 assay compatibility; "Correlation matched" used only AS data with the highest regularised correlation for each  
 887 DMS dataset. Control results are shown as green boxes for predictions on the same residues without AS data as a  
 888 feature. Panel B shows change of prediction  $\rho$  for each DMS and AS data pair. A higher value indicates higher  
 889 prediction accuracy achieved when using AS data. Different approaches to filtering the data are also shown on  
 890 the x-axis as described. Notches show the 95% confidence interval around the median, and whiskers show the full  
 891 value range.

892

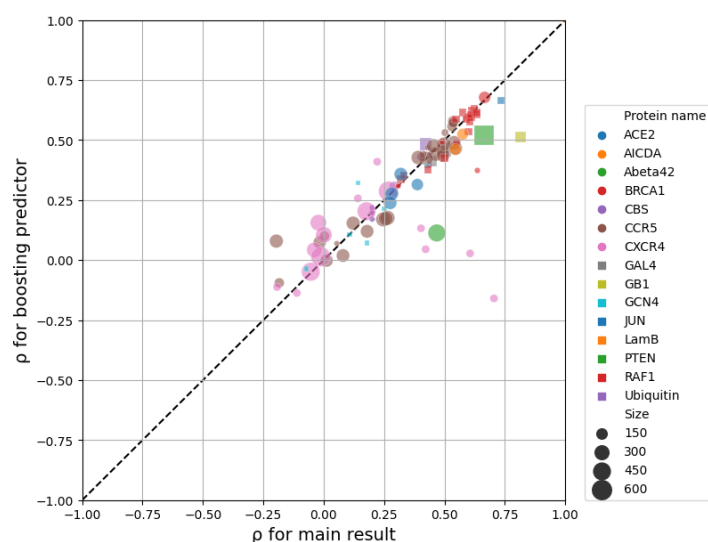

893

894 **Fig S12. Boosting setup shows similar performance as the main result.** Each dot represents a filtered  
 895 DMS/AS data pair of high assay compatibility. The vertical and horizontal axes show the prediction Spearman's  
 896  $\rho$  for either modelled with boosting or the one-step (main result) setup. The colours and shapes of the dots corre-  
 897 spond to the target protein, and size indicates the number of variants in each data pair.

898

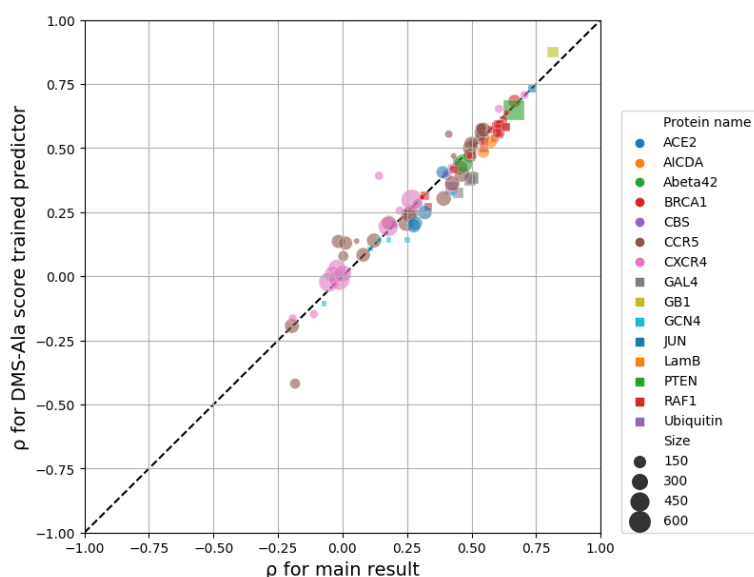

899

900 **Fig S13. Training with DMS scores of alanine substitutions shows similar performance as the main result.**  
 901 The vertical and horizontal axes show the prediction Spearman's  $\rho$  for predictors either trained with DMS score  
 902 of alanine substitutions (DMS-Ala) or AS data of high assay compatibility (main result), yet all evaluated on high

903 compatibility AS data. The colours and shapes of the dots correspond to the target protein, and size indicates the  
 904 number of variants in each data pair.

905

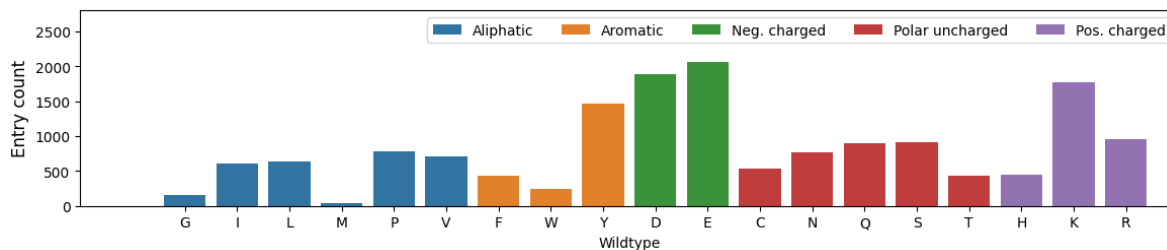

906

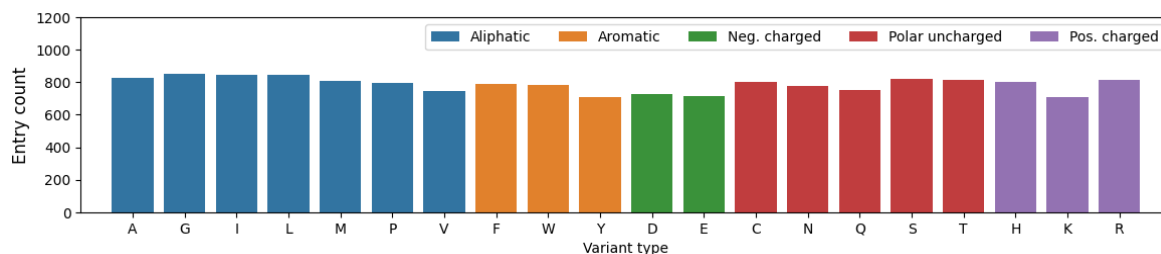

907

908 **Fig S14. Count of variant entries for each wild-type or variant amino acid of high assay compatibility data.**

909 (Neg.: negatively, Pos.: positively)

910

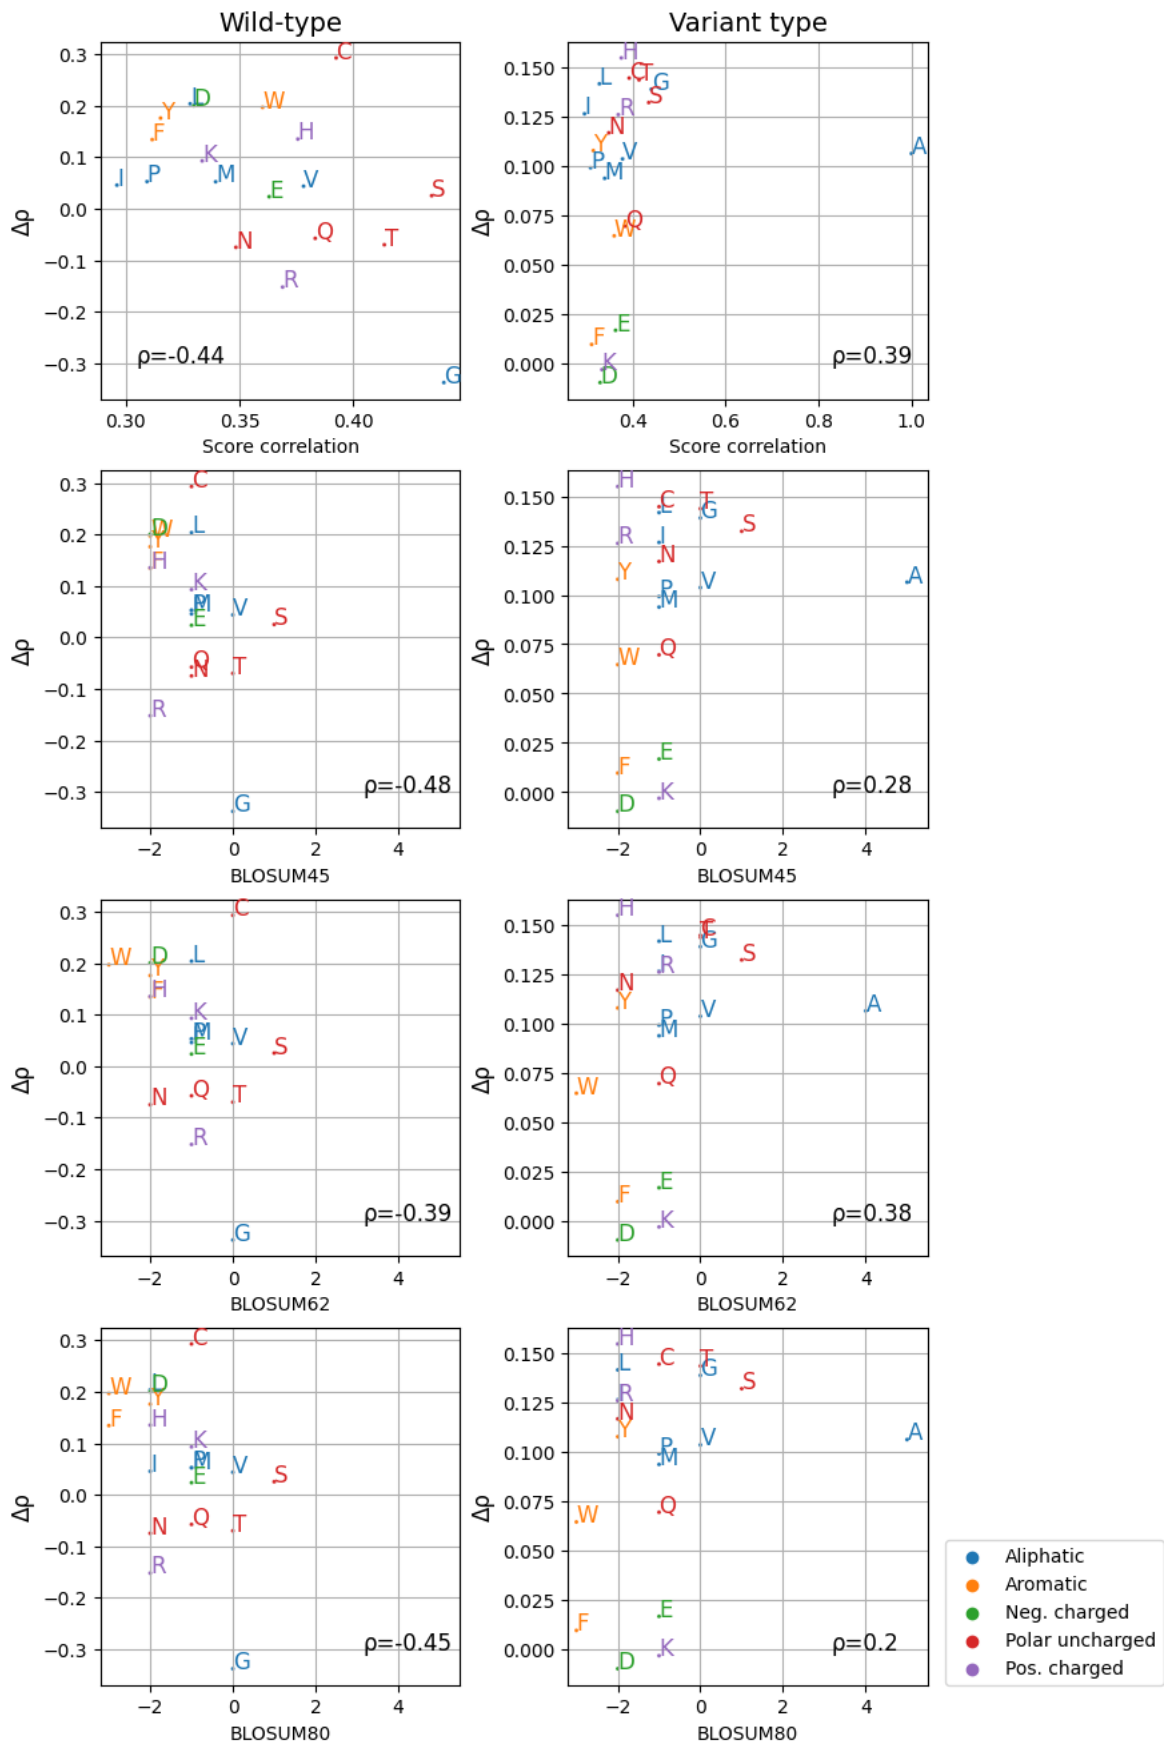

912 **Fig S15. Relationship between amino acid similarity and model performance.** For each amino acid, its sim-  
 913 ilarity to alanine was computed by their DMS score correlation or using BLOSUM scores as shown on the x-axis.  
 914 The performance improvement ( $\Delta\rho$ ) for each wild-type (left) or variant (right) amino acid while using AS data  
 915 were computed as previously mentioned (Fig 7), with their Spearman's correlation against the similarity meas-  
 916 urements shown on the figure. The label for each amino acid is coloured by the amino acid physicochemical  
 917 property. (Neg.: negatively; Pos.: positively)

918

919 **Table S1. DMS/AS correlation on each secondary structural region.** The secondary structure of each variant  
 920 is determined by UniProt annotations. The Spearman's correlation between DMS and all or high compatibility  
 921 AS data on each structural region is computed, with the number of protein residues involved shown in parenthesis.

| $\rho$ (n_residues)      | HELIX      | STRAND    | TURN      |
|--------------------------|------------|-----------|-----------|
| All AS                   | 0.13 (233) | 0.13 (83) | 0.17 (22) |
| AS of high compatibility | 0.28 (115) | 0.26 (56) | 0.41 (15) |

922

923 **Table S2. Amount of data with AS scores available**

| Data composition                | Protein | DMS dataset | AS dataset <sup>1</sup> | Variant entries <sup>2</sup> |
|---------------------------------|---------|-------------|-------------------------|------------------------------|
| All AS                          | 22      | 54          | 146                     | 70446                        |
| Compatibility filtered          | 15      | 35          | 60                      | 15739                        |
| High+medium assay compatibility | 21      | 51          | 105                     | 28380                        |
| Correlation matched             | 22      | 54          | 32                      | 7940                         |

924 1. This column shows how many unique AS datasets are included.

925 2. Include duplicated variants caused by multiple experiments targeting the same protein variant.

926

## 927 **Supplementary information**

### 928 **Applying AS data to Envision method**

929 We re-implemented a predictor based on Envision [17] to incorporate AS data. Features used  
930 in Envision were downloaded from its online toolkit. All Envision features are used for mod-  
931 elling except for substitution type (wt\_mut) which has low importance according to the pub-  
932 lished result and our pilot studies yet is computationally expensive in our setup. Protein data  
933 were excluded if their features were not available online. DMS and AS data pairs with high  
934 assay compatibility were used for modelling. Missing feature values were imputed by the mean  
935 values for numerical features or the most frequent values for categorical features. Categorical  
936 features are encoded with the one-hot encoder. We used `sklearn.ensemble.Gradient-`  
937 `BoostingRegressor` from scikit-learn package [130] to build the predictor, and hy-  
938 perparameters were tuned by Bayesian Optimization [139] with Group K-Fold (protein-30-fold)  
939 cross-validation. The training and evaluation process were similar to that previously described.  
940 For comparison, we repeated the DeMaSk-based analysis on the same subset of data.

941

### 942 **Boosting with AS data**

943 To deal with the sparsity of AS data, we tested a variant impact predictor based on boosting. A  
944 first linear regression predictor was trained with all training DMS data using the three DeMaSk  
945 features without AS data, which was the same as the control predictor mentioned previously.  
946 We then calculated the prediction error by subtracting the predicted scores from DMS scores,  
947 and a second linear regression predictor was trained to predict the error. The second predictor  
948 was trained only on DMS/AS data of high assay compatibility and used both protein features  
949 and the encoded AS scores. The final prediction result was the sum of the outputs from these  
950 two predictors.

951

952 **Replacing AS data with DMS scores of alanine substitutions**

953 We investigated another potential approach to overcome the sparsity of AS data by replacing  
954 the AS feature with the DMS scores of alanine substitutions (DMS-Ala). The intention of this  
955 study is to model the scenario of ideal AS data, which perfectly matches the DMS-Ala data  
956 during training. To do this, for all DMS datasets we collected, their AS feature values, regard-  
957 less of availability, were replaced by the DMS-Ala scores on the same residue. Missing scores  
958 were imputed by the mean value of all DMS-Ala scores. A regression model was trained and  
959 evaluated as previously described, using the three DeMaSk features as well as the DMS-Ala  
960 scores. The AS data of high assay compatibility are still used for the testing process.

961

## Reviewer 1 - Joseph Ng

This manuscript explored whether low-throughput alanine scanning (AS) experimental data could complement deep mutational scanning (DMS) to classify the impact of amino acid substitutions in a range of protein systems. The analysis partially confirms this hypothesis in that it only applies when the functional readout being measured in the two assays are compatible with one another.

In my opinion this is an insight that should be highlighted in a publication and therefore I believe this manuscript deserved to be published. I just wish the authors could clarify & further explore the points below better in their manuscript before recommending for acceptance:

1. In my opinion the most important bit of data curation is the classification of DMS/AS pairs as high/medium/low etc. compatible, and this is the key towards the authors' insight that assay compatibility is an important determinant of whether signals in the two datasets could be cross-matched for analysis. The criteria behind this classification are listed in Figure S2 but I feel the wording needs to be more specific. For example, in Figure S2, the authors wrote 'Both assays select for similar protein properties and under similar conditions' - what exactly does this mean? What does the authors consider to be 'similar protein properties'? I could not find more detailed explanation of this in the Methods section. The authors gave reasons in the spreadsheet in Supp. Table 1 for the labels they give to each pairs of assays, but I'm still not exactly sure what they consider to be 'similar'. Is there are more specific classification scheme which is more explicit in defining these 'similarities', e.g. by defining a scoring grid explicitly listing the different levels of 'similarities' of measurable properties, e.g. both thermal stability - score of 3; thermal stability vs protein abundance - 2; thermal stability vs cell survival - 1 (or equivalent, I think the key issue is to provide the reader with a clear guide so they can readily assess the compatibility of the datasets by themselves)?

### **Response:**

Thank you for the comment. In the Methods section, we added a detailed explanation about which assays are similar (line 335):

*We categorized each DMS or AS assay by the protein property or function using the following assay types: binding affinity, enzyme activity, protein abundance, cell survival, pathogen infection, drug response, ability to perform a novel function, or other protein-specific*



activities (e.g., transcription activity for transcription factors) (Supplementary Table 1).

We also refined Fig S2 and its legend (also shown below) corresponding to the updated Methods. In the Supp. Table 1, we added the DMS and AS categories beside the reasons of compatibility classifications.

For each **pair** of DMS and AS experiments:

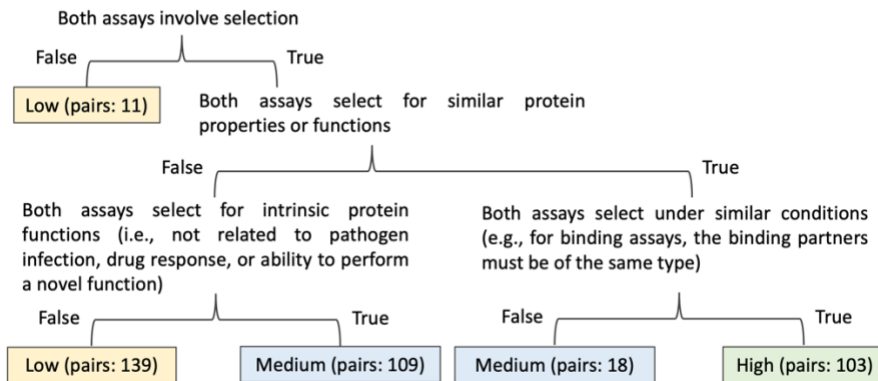

**Fig S2: Decision tree for classifying DMS and AS assay compatibility.** The similarity of DMS and AS assays are compared (Methods) and the DMS/AS assay pairs are classified using three levels of compatibility (low, medium, high). The leaf-node text and color show the classified assay compatibility. The number indicates the count of assay pairs for each compatibility level.

2. I would have thought discrepancy between the DMS and AS scores to be different across different structural regions of the protein, e.g. the discrepancy would be larger in ordered region compared to disorder as the protein fold would constrain the types of amino acids tolerable within the ordered segment of the protein. Is this the case in the authors' collection of datasets? If so, does the compatibility of assays modulate this discrepancy?

### Response:

Thank you for this suggestion. To explore this, we annotated the structural regions for our variants using UniProt. We found only one protein in our dataset that has alanine scanning data available in a disordered protein region. This makes it impractical for us to analyse the ordered/disordered score discrepancy.

We next grouped variants by secondary structure (HELIX, STRAND and TURN) and calculated the Spearman's  $\rho$  between all DMS scores and AS scores as shown in Table S1 (also below). We found that TURN regions tended to have high score correlation compared to HELIX and STRAND, and this trend was stronger for DMS/AS data with high assay compatibility. We added a description of this result in the main text (line 120):

*This trend of increased correlation for high compatibility assay pairs holds across secondary structures (Table S1).*

| $\rho$ (n_residues)      | HELIX      | STRAND    | TURN      |
|--------------------------|------------|-----------|-----------|
| All AS                   | 0.13 (233) | 0.13 (83) | 0.17 (22) |
| AS of high compatibility | 0.28 (115) | 0.26 (56) | 0.41 (15) |

**Table S1. DMS/AS correlation on each secondary structural region.** The secondary structure of each variant is determined by UniProt annotations. The Spearman's correlation between DMS and all or high compatibility AS data on each structural region is computed, with the number of protein residues involved shown in parenthesis.

Reviewer 2 - Leopold Parts

### Summary

Fu et al. explore utilising low-throughput mutational fitness measurements to predict the results of high-throughput deep mutational scanning experiments. They demonstrate that adding alanine scanning results to predictive models improves performance, as long as the alanine scan used a sufficiently similar evaluation approach to a deeper experiment. The findings make intuitive sense, and will be useful for the community to internalize.

While we have several comments about the methods used, and requests to fortify the claims with more characterization, we do not expect addressing any of them will change the core findings. One can argue that direct application of AS boosted predictions is likely to be limited due to the number of scans available and the speed at which DMS experiments are now being performed, so it would also be useful to discuss the context of these results in the evolution of the field, and we make specific suggestions for this. Regardless, the presented results are a useful demonstration of a more general use case of low-throughput or partial mutagenesis data for improving fitness prediction and imputation.

### Response:

Thank you for the feedback. We have added extra context information about related research, strengthening the motivation and contribution of this study. Details can be found in the responses to the first minor comment below.

Major Comments

\* There are many other computational variant effect predictors beyond Envision and DeMaSk. It would be very useful to see how their prediction results compare to some others, particularly the best performing and common models that are also straightforward to download and run (e.g. EVE, ESM1v, SIFT, PolyPhen2). This would be important context to see how impactful the addition of AS data is to DeMaSk/Envision. Please run additional prediction tools for reference of absolute performance; there is no need to incorporate AS data into them.

### Response:

Thank you for this comment. We avoided doing this initially because our primary motivation was to investigate if AS data can improve predictors, leading us to focus on the improvement rather than absolute performance achieved.

We agree that benchmarking other predictors is useful to help readers contextualize performance and improvement. As suggested, we ran several of these predictors locally or online and compared with our results as shown in Fig S9 (also shown below). These predictors were run with default settings. We found it hard to run EVE locally since it requires substantial GPU resources. Instead, we collected pre-calculated EVE prediction results (details in Method section, line 387). A brief explanation of this result can be found in the main text (line 176). Specifically:

*Our compatibility-filtered predictor shows improved prediction accuracy for these regions compared to not only the baseline model, but other widely used predictors as well.*

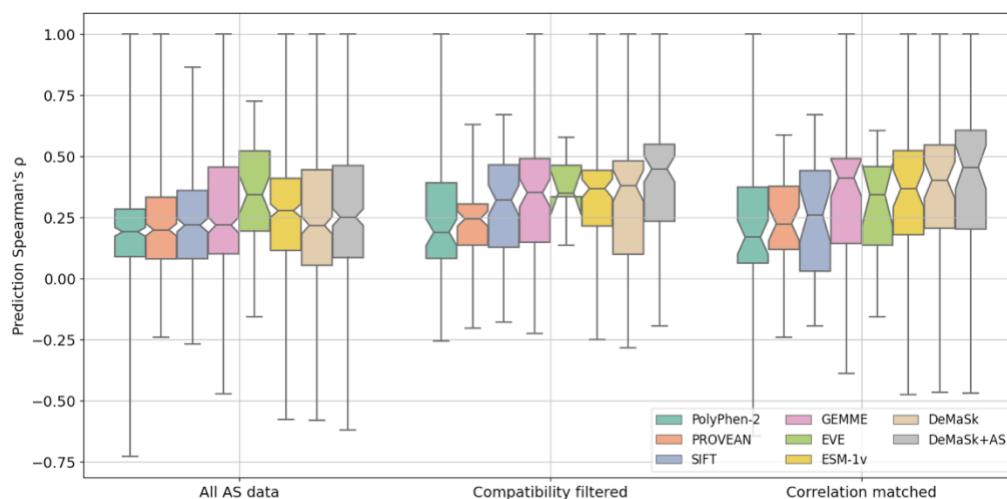

**Fig S9. Model performance on various variant effect predictors.** The Spearman's  $\rho$  between DMS scores and predicted scores from different variant effect predictors for each DMS and AS pair are shown as box plots. Results are evaluated on different sets of variant data shown on the x-axis: "All AS data" used all available data; "Compatibility filtered" used only data of high

assay compatibility; "Correlation matched" used only AS data with the highest regularised correlation for each DMS dataset. The figure does not include residues without available AS scores. Results for data pairs with only one residue are not shown. Notches show the 95% confidence interval around the median, and whiskers show the full value range.

\* Several proteins have a very small number of AS residues (Figure 2), and from our reading of the methods, other residue scores are imputed with the mean AS value for that protein. (As an aside, it would be good to clarify if this average is across studies or within study). If this reading is correct, the majority of residues for each proteins will have imputed AS results (e.g. in case of PTEN, over 90%), which can be problematic for training and prediction. Please clarify if our interpretation of the imputation approach is correct, and if so, please also provide results for a model trained without imputation, on many fewer residues. If the boosting model has already implemented this, please integrate the Supplementary methods into the main methods, and reference these and the results when describing the imputation approach to avoid such concerns.

**Response:**

This interpretation is correct. The missing AS values are imputed by the average score across all studies. We have emphasized this statement by adding (line 356):

AS scores were imputed with the mean value of all available AS scores *across all studies*.

The boosting model is related to this yet not directly answering the question at hand. So, here we add the modelling results for training without imputed variants, i.e., just on the AS-available residues, as shown in Fig S11 (also shown below). The models show similar pattern of improvement (Fig S11 B) compared to the main results in Fig 5 (also shown below). However, the absolute prediction performance (Fig S11 A) is worse than the main results in Fig S4 (also shown below), likely because the models are trained on a much smaller number of variants. We added several sentences in the manuscript referring to this result (line 195-200):

We also explored the consequences of the sparsity of AS data on our model in three ways: *i) by training only with variants that have AS data available; ... The first approach gave lower absolute prediction performance, presumably because the model was under-fitted due to the small number of variants.*

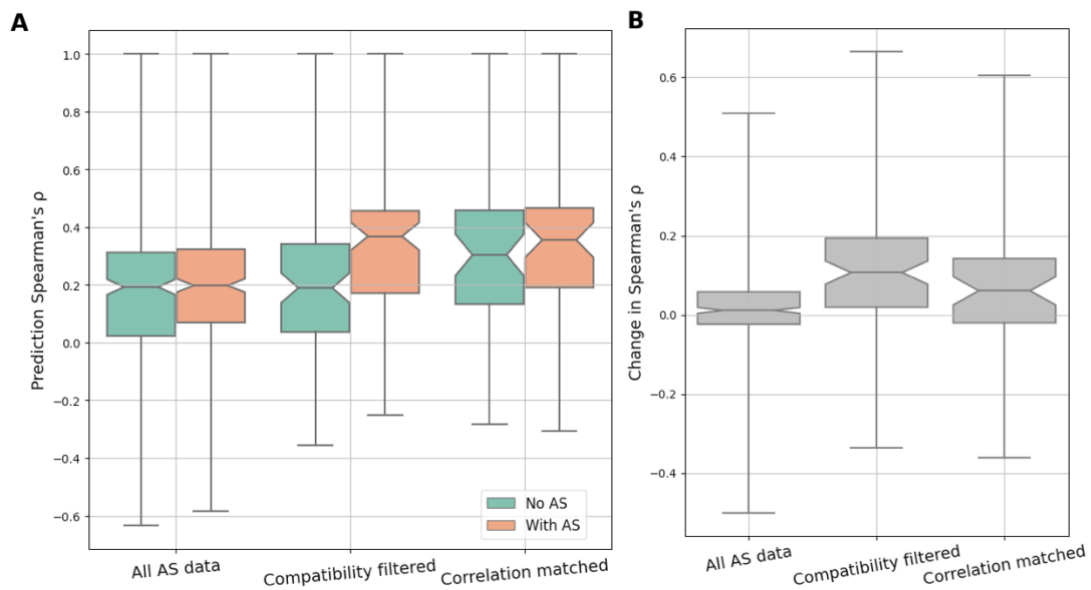

**Fig S11. Model performance for training with AS-data-available-residues.** The predictors were trained only on variants that have AS data available. Panel A shows the performance visualized by prediction Spearman's  $\rho$  for DMS scores and predicted scores for each DMS and AS data pair. Different approaches to filtering the data are shown on the x-axis: "All AS data" used all available data; "Compatibility filtered" used only data of high assay compatibility; "Correlation matched" used only AS data with the highest regularised correlation for each DMS dataset. Control results are shown as green boxes for predictions on the same residues without AS data as a feature. Panel B shows change of prediction  $\rho$  for each DMS and AS data pair. A higher value indicates higher prediction accuracy achieved when using AS data. Different approaches to filtering the data are also shown on the x-axis as described. Notches show the 95% confidence interval around the median, and whiskers show the full value range.

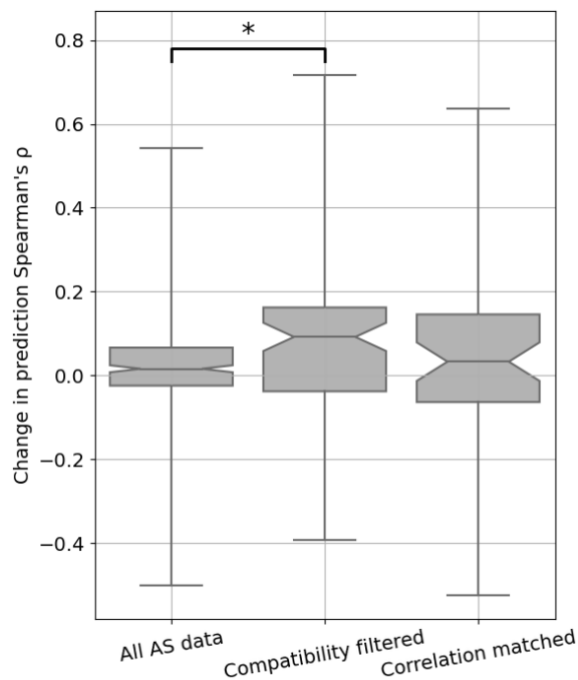

**Fig 5. Performance of variant impact prediction is improved using AS data with high assay compatibility.** The change in prediction  $\rho$  achieved by including the AS data feature for each DMS and AS data pair is shown as box plots. A higher

value represents higher prediction accuracy achieved for using AS data. Different approaches to filtering/matching the data are shown on the x-axis: "All AS data" used all available data; "Compatibility filtered" used only data of high assay compatibility; "Correlation matched" used only data with the highest regularised correlation for each DMS dataset. Results for data pairs with only one residue are not shown. P-values were calculated using Welch's test and jointly corrected using Holm-Šidák (Methods), \*:  $p < 0.05$ . Notches show the 95% confidence interval around the median, and whiskers show the full value range.

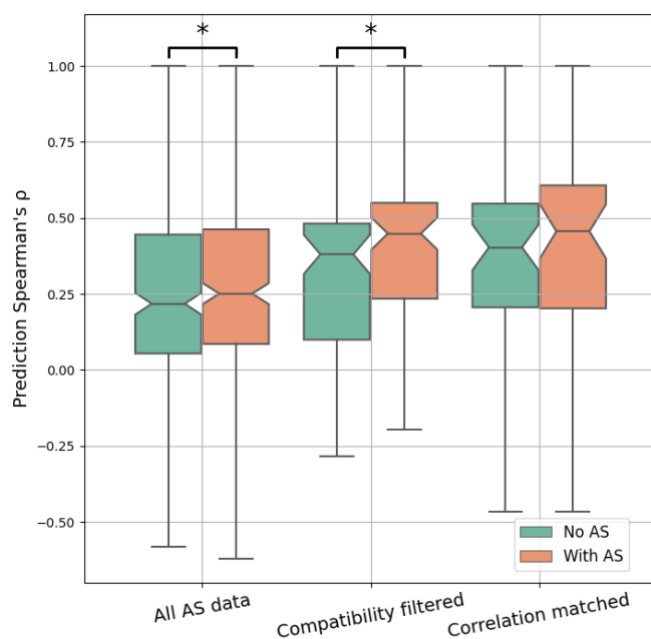

**Fig S4. Performance comparison between predictors with or without AS data.** The Spearman's  $\rho$  between DMS scores and predicted scores for each DMS and AS data pair are shown as box plots. Different approaches to filtering the data are shown on the x-axis: "All AS data" used all available data; "Compatibility filtered" used only data of high assay compatibility; "Correlation matched" used only data with the highest regularised correlation for each DMS dataset. The figure does not include data without available AS scores. This means that the different results are not directly comparable since they are computed for different subsets of DMS/AS data pairs (for example, "All AS data" contains all DMS/AS data pairs, but "Compatibility filtered" contains only data pairs of high assay compatibility). Control results are shown as green boxes for predictions on the same residues without AS data as a feature. The underlying  $\rho$  for each data pair in the control results is the same, but the boxes are shifted due to data filtering. Results for data pairs with only one residue are not shown. P-values were calculated using paired t-test and jointly corrected using Holm-Šidák (Methods), \*:  $p < 0.05$ . Notches show the 95% confidence interval around the median, and whiskers show the full value range.

\* It is not clear how significant/impactful the increases in performance are in figures 4, 5, S4, S5 & S6. Please use a reasonable analytical test, or training data randomization to evaluate the improvement against a null model.

**Response:**

We initially used notched box plots to indicate the confidence interval (95%) of the median and now emphasize this in the legend for each box plot with extra description in Methods (line 384):

*The 95% confidence interval of median values are calculated by Gaussian-based asymptotic approximation.*

We have also added statistical tests to these figures (also shown below). For Figure 4, we used Welch's test to compare the mean values between each compatibility group (High vs. Medium, High vs. Low, High vs. Overall, Medium vs. Low, ...), and corrected for multiple testing using the Holm-Šidák method. This is now described in the figure legend (see below).

For Figures 5 and S5, we also used Welch's test to compare the mean improvement between each pair of models. For Figures S4 and S6, we used paired t-tests to compare if using AS data improves the prediction correlation for each model. Since results in these four figures are highly related, their statistical results are corrected jointly using the Holm-Šidák method. These figures have been updated in the manuscript (summarized below) with brief explanations added to the figure legends. A description of the statistical tests was added to the Methods (line 381):

*Model performance was compared using the following statistical tests. Results in Fig 5 & S5 were tested with Welch's test, and results in Fig S4 & S6 were tested with paired t-tests. The p-values were jointly corrected using the Holm-Šidák method.*

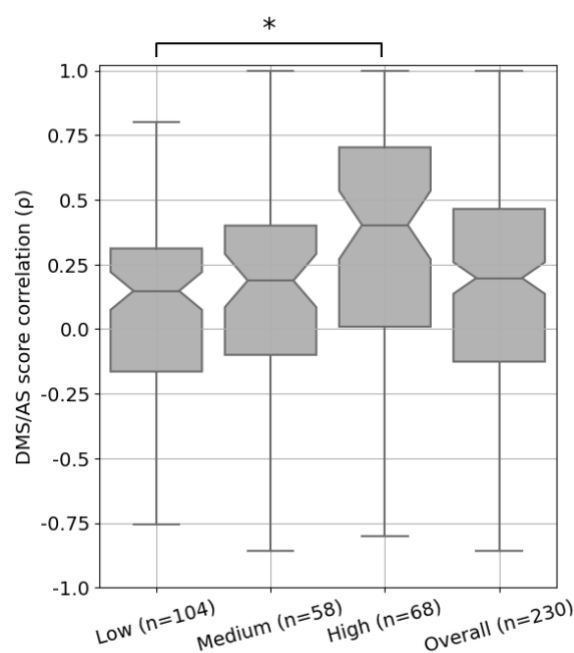

**Fig 4. DMS and AS data pairs with high assay compatibility show a higher score correlation.** Each box shows the Spearman's  $\rho$  between DMS and AS data pairs for each level of assay compatibility or overall. The correlation coefficients

were calculated between alanine substitution scores in each pair of AS and DMS datasets. Results for pairs with less than three alanine substitutions were removed. *P*-values calculated using Welch's test and corrected using Holm-Šidák, \*:  $p < 0.05$ ; notches show 95% confidence interval around median, and whiskers show the full value range.

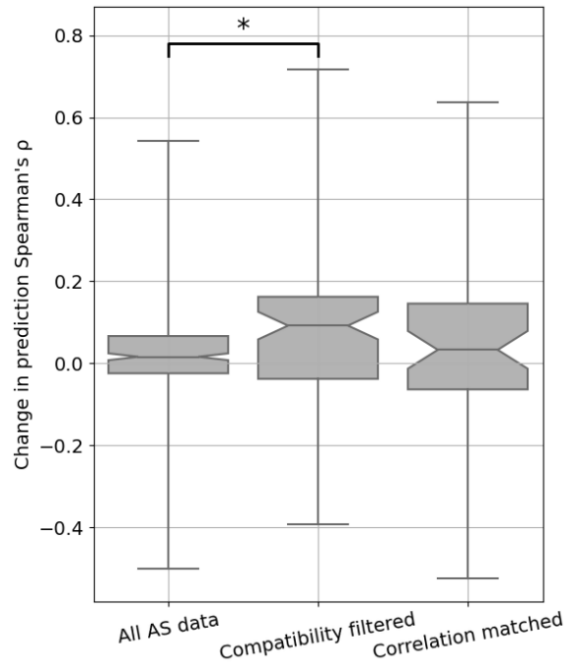

**Fig 5. Performance of variant impact prediction is improved using AS data with high assay compatibility.** The change in prediction  $\rho$  achieved by including the AS data feature for each DMS and AS data pair is shown as box plots. A higher value represents higher prediction accuracy achieved for using AS data. Different approaches to filtering/matching the data are shown on the x-axis: "All AS data" used all available data; "Compatibility filtered" used only data of high assay compatibility; "Correlation matched" used only data with the highest regularised correlation for each DMS dataset. Results for data pairs with only one residue are not shown. *P*-values were calculated using Welch's test and jointly corrected using Holm-Šidák (Methods), \*:  $p < 0.05$ . Notches show the 95% confidence interval around the median, and whiskers show the full value range.



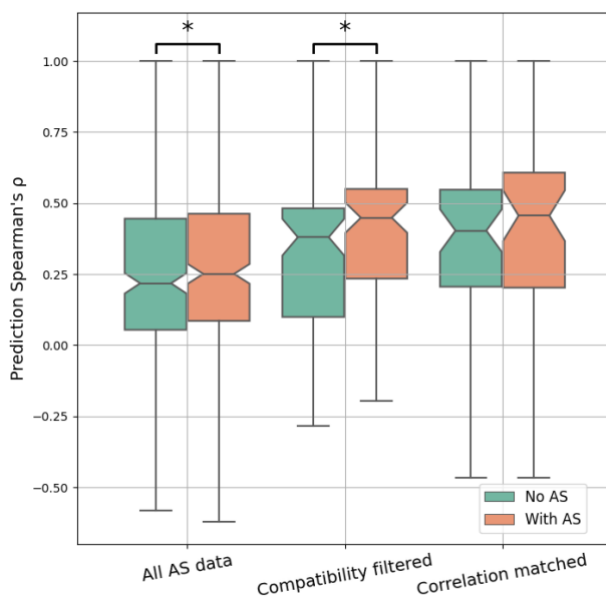

**Fig S4. Performance comparison between predictors with or without AS data.** The Spearman's  $\rho$  between DMS scores and predicted scores for each DMS and AS data pair are shown as box plots. Different approaches to filtering the data are shown on the x-axis: "All AS data" used all available data; "Compatibility filtered" used only data of high assay compatibility; "Correlation matched" used only data with the highest regularised correlation for each DMS dataset. The figure does not include data without available AS scores. This means that the different results are not directly comparable since they are computed for different subsets of DMS/AS data pairs (for example, "All AS data" contains all DMS/AS data pairs, but "Compatibility filtered" contains only data pairs of high assay compatibility). Control results are shown as green boxes for predictions on the same residues without AS data as a feature. The underlying  $\rho$  for each data pair in the control results is the same, but the boxes are shifted due to data filtering. Results for data pairs with only one residue are not shown. *P-values were calculated using paired t-test and jointly corrected using Holm-Šidák (Methods), \*:  $p < 0.05$ . Notches show the 95% confidence interval around the median, and whiskers show the full value range.*

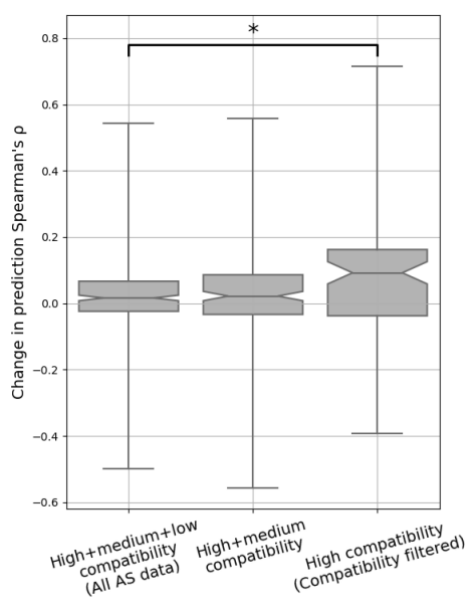

**Fig S5. The change in prediction performance for using data of different assay compatibility levels.** The change of prediction Spearman's  $\rho$  for each DMS

and AS data pair is shown as box plots. A higher value represents higher prediction accuracy achieved for using AS data. Different data filtering methods are shown on the x-axis. Results for data pairs with only one residue are not shown. *P-values were calculated using paired t-test and jointly corrected using Holm-Šidák (Methods), \*:  $p < 0.05$ . Notches show the 95% confidence interval around the median, and whiskers show the full value range.*

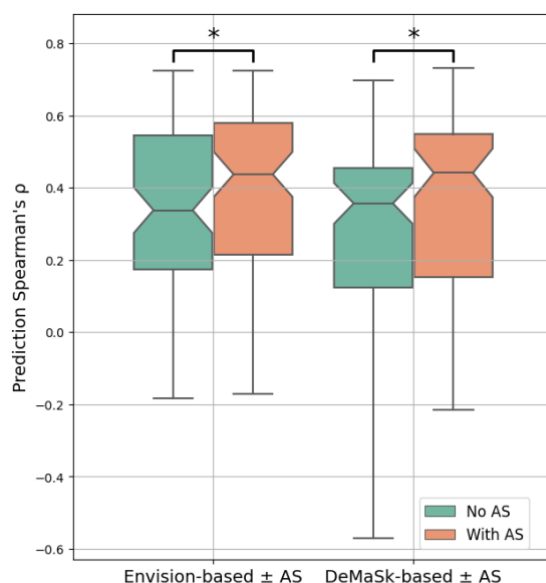

**Fig S6. Prediction performance is improved while incorporating high compatibility AS data into the Envision model.** The Spearman's  $\rho$  between experiment DMS scores and predicted scores for each DMS/AS assay pair with high compatibility are shown as box plots. The x-axis shows the predictor used, either Envision or DeMaSk. Control results are shown as green boxes for predictions on the same residues without AS data as a feature. Results for data pairs with only one residue are not shown. *P-values were calculated using paired t-test and jointly corrected using Holm-Šidák (Methods), \*:  $p < 0.05$ . Notches show the 95% confidence interval around the median, and whiskers show the full value range.*

\* There are quite a few proteins with repeated DMS/AS measurements. In our experience these correlate from moderately to very highly. Including multiple highly correlated studies could lead to pseudo-replication and biasing the model performance results. Please present a version of the results where the repeats are averaged first to test whether that bias exists.

### Response:

We indeed observed multiple cases where one protein might have several DMS or AS experiments available. While training the models, to avoid potential bias, we weighted each protein variant equally to compensate for certain regions having greater coverage with DMS and AS assays. This process was equivalent to averaging variant scores in the training data.

But during the evaluation process, we agree that these pseudo-replicates may still exist.

Here we averaged DMS and AS results from experiments that: 1. Were published in the same paper; 2. Targeted the same protein region; 3. Used the same type of assays (binding affinity, enzyme activity, protein abundance, cell survival, etc.). Then we evaluated the model performance on averaged datasets, as shown in Fig S8 (also shown below). We observe a similar pattern of improvement to the main result (Fig. 5 also shown below) and have added this result to the main text (line 162):

*Additionally, to ensure the models performance is not biased by pseudo-replication of multiple datasets, we averaged DMS and AS scores that were part of the same study and type of assay, and saw similar results (Fig S8).*

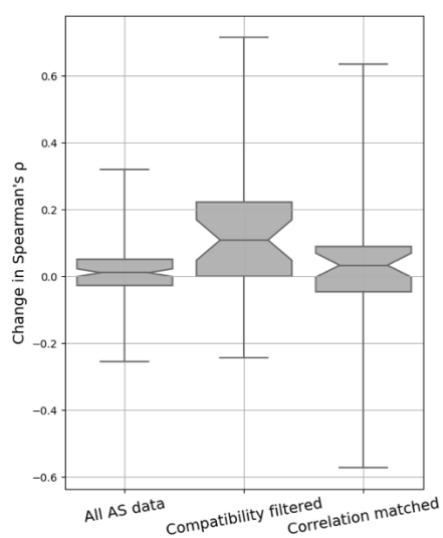

**Fig S8. Performance improvement on averaged DMS/AS testing data.** This figure shows model performance when we averaged variant scores for DMS or AS data that are: i) published in the same paper; ii) targeting the same protein region; iii) measured by the same type of assays (Supplementary Table 1). The change of prediction  $\rho$  for each averaged DMS and AS data pair is shown. A higher value represents higher prediction accuracy achieved when using AS data. Different approaches to filtering/matching the data are shown on the x-axis: "All AS data" used all available data; "Compatibility filtered" used only data of high assay compatibility; "Correlation matched" used only data with the highest regularised correlation for each DMS dataset. Results for data pairs with only one residue are not shown. Notches show the 95% confidence interval around the median, and whiskers show the full value range.

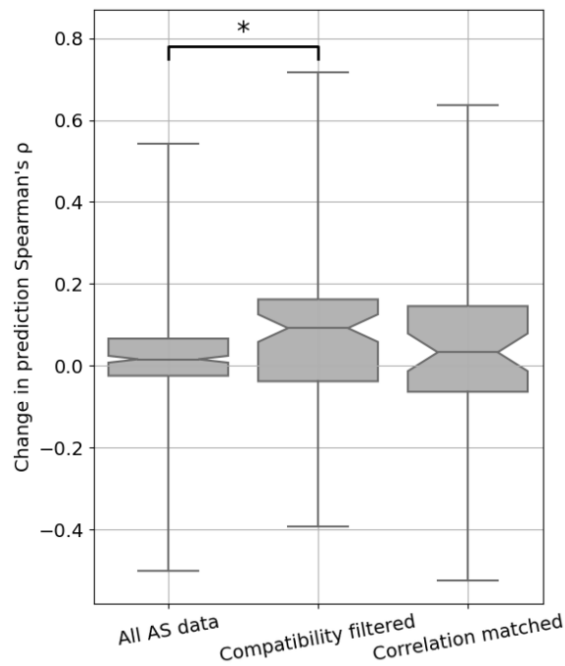

**Fig 5. Performance of variant impact prediction is improved using AS data with high assay compatibility.** The change in prediction  $\rho$  achieved by including the AS data feature for each DMS and AS data pair is shown as box plots. A higher value represents higher prediction accuracy achieved for using AS data. Different approaches to filtering/matching the data are shown on the x-axis: "All AS data" used all available data; "Compatibility filtered" used only data of high assay compatibility; "Correlation matched" used only data with the highest regularised correlation for each DMS dataset. Results for data pairs with only one residue are not shown. P-values were calculated using Welch's test and jointly corrected using Holm-Šidák (Methods), \*:  $p < 0.05$ . Notches show the 95% confidence interval around the median, and whiskers show the full value range.

Minor Comments [suggestions only; no analyses required from us]

\* A short discussion about the number of available alanine scans, particularly for proteins without DMS results, would help put the work in context. For example, it would be good to know how many proteins would benefit from improved de-novo predictions (e.g. no DMS data) and how many could have improved imputation (incomplete DMS data). Similarly the rate and cost of DMS data generation is important to understand the utility of their results. I think a short discussion of how useful models of this sort are in practice now and in future would be helpful to the reader. This seems most natural as part of the end of the discussion, but could also fit in the introduction.

To our knowledge, there is no well-established database for AS datasets, so, it is challenging to determine how many proteins and which regions have AS data available. But we did find some papers talking about DMS data availability and we added a sentence in the introduction (line 43):

*So far, hundreds of DMS studies covering tens of thousands of nucleotides have been published <PMID 36055970>, and experiments targeting over a hundred additional genes are underway according to MaveRegistry <PMID 33774657>.*

To discuss the utility of variant effect predictors, we also added the following sentence (line 56):

*These variant effect predictors can also be benchmarked using DMS experimental results and to assist the interpretation of experimental data.*

\* Figure 2 is missing y axis label. We also softly suggest log scale axis, to not obscure the degree to which some proteins have more residues covered and the proportion of residues covered by AS.

We added y axis label to Figure 2. We also tried to use log scale as shown below. However, the purpose of this figure is to demonstrate the proportion of residues that have AS data available, which we think is not best demonstrated on log scales.

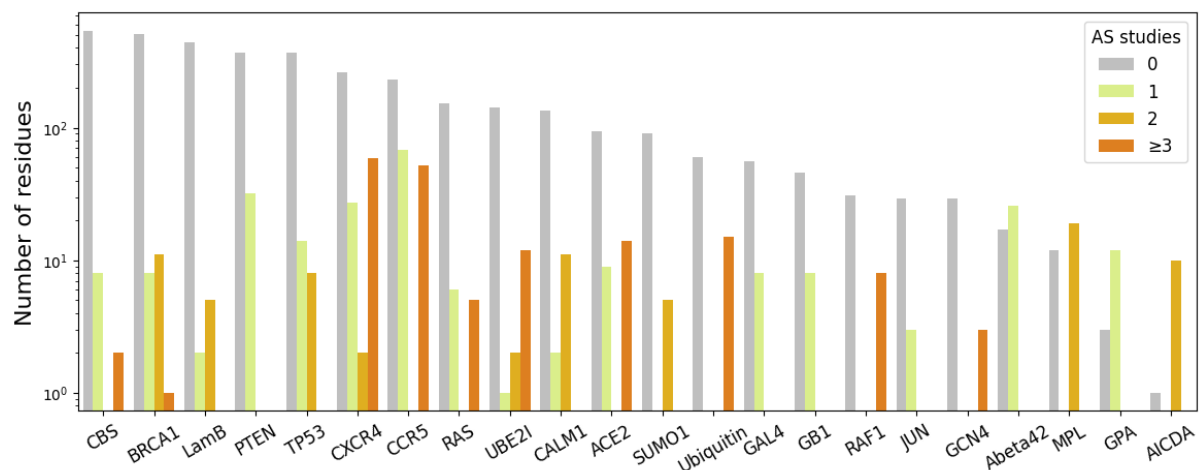

**AS data coverage on DMS scanned region (log-scaled).** The horizontal shows different proteins. Each bar represents the number of residues assayed by a given number of AS studies.

\* Figure 3 includes DMS/AS study pairs with at least three alanine substitutions to compare - we think this is a low cut-off, particularly with the regularisation applied. I think something like 10+ would be more informative.

We explored setting the threshold to 10 (left) or 15 (middle) and the result is shown below. It seems quite similar to Fig 3 in the main text, shown below (right), with similar distribution and median value but indeed with less extreme values. Since, the purpose of this figure is to

give a general idea of how the datasets are correlated, we are inclined to include more datasets in the analysis.

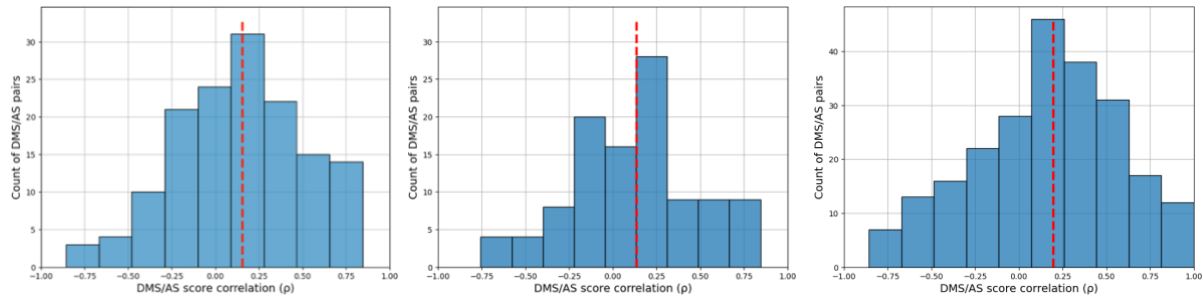

**Correlation between DMS and AS data shows substantial variation.** We calculated Spearman's  $\rho$  between alanine substitution scores in each pair of AS and DMS data. The results for pairs with less than 10 (left), 15 (middle) or 3 (right) alanine substitutions are not shown. The red dashed line shows the median  $\rho$ .

\* I think their cross-validation scheme leaves out an entire protein at a time, as opposed to one study each iteration. I agree this is the better way to do it. However, I initially read it as the latter, which would lead to leakage between train/validation data since the same residue would be included in both if a protein had multiple datasets. It might be useful to be more explicit to prevent other readers doing the same.

Thank you for the comment. We have now clarified this in the text (line 140):

We applied a leave-one-protein-out cross-validation approach to training and testing, *avoiding information leakage for variants of the same protein target.*

\* L231 In the discussion they mention fitting a model only using studies with a minimum DMS/AS correlation. This occurred to me as well while reading the relevant part of the results. Is there a good reason not to do this? It doesn't seem like a large amount of work and conceptually seems a good way to assess a model that says what a DMS might look like if it had the same selection criteria as a given AS.

While doing the correlation matching, we additionally set thresholds for the regularized correlation values of 0, 0.25, 0.5. The result, together with the original ones, are shown in Fig S7 (also shown below), indicating that constraining the regularized correlation to be larger than 0 and 0.25 will give higher median improvement compared to the original correlation matching result. However, performance drops when using threshold of 0.5. The likely explanation of this is that many datasets are discarded. We added one sentence in the main text referring to this result (line 161):

However, when applying a stricter threshold, the correlation matched models still show limited improvement.

And the original sentence in L231 was deleted.

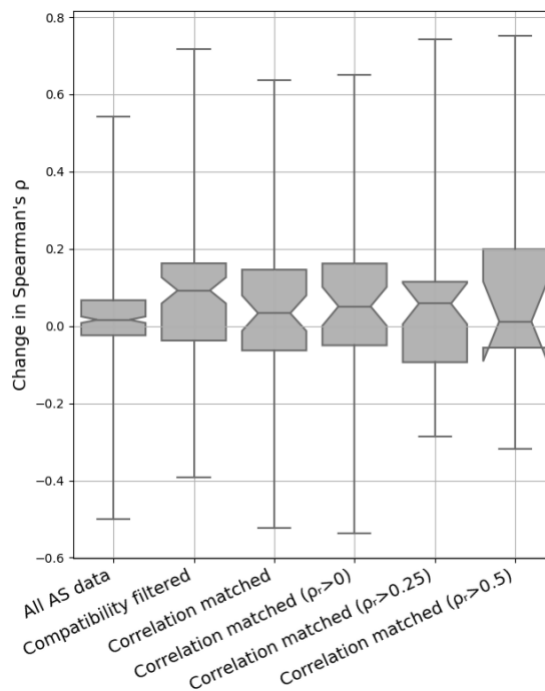

**Fig S7. Performance improvement on thresholded correlation matching.** The change of prediction  $\rho$  for each DMS and AS data pair is shown as box plots. Different approaches to filtering/matching the data are shown on the x-axis: "All AS data", "Compatibility filtered" and "Correlation matched" are the same results as previously discussed; while doing correlation matching, a further thresholding (0, 0.25 or 0.5) on the regularized DMS/AS correlation values ( $\rho_r$ ) was applied. Notches show the 95% confidence interval around the median, and whiskers show the full value range.

\* L154 Similarly, a correlation cut-off as well as choosing the most correlated study seems like it would be a fairer comparison in figure 5. Just because an AS is the most correlated doesn't necessarily mean it is well correlated.

Please see the response above.

\* It would be interesting to see if the improvement results in figure 7 correlate with substitution matrices (e.g. Blosum) or DMS variant fitness correlations (e.g. correlation between A and C, A and D, etc.). Intuitively it feels like they should.

Here we tried to demonstrate how amino acid similarity between alanine and a certain amino acid (measured by DMS score correlation or BLOSUM scores) conforms with the improvement of using AS data ( $\Delta\rho$ ), when the wild-type or variant type is the amino acid. For DMS score correlation,

the correlation between DMS score of alanine (A) substitutions against all other amino acids (C, D, ...) were computed ( $\rho_{A,C}$ ,  $\rho_{A,D}$ , ...). For BLOSUM scores, we used BLOSUM 45, 62 and 80 for alanine versus other amino acids ( $\beta_{A,C}$ ,  $\beta_{A,D}$ , ...). The performance improvement for each wild-type or variant amino acid while using AS data were taken from the data underlying Figure 7.

These results are visualized in Fig S15 (also shown below). These similarity metrics show negative correlation with  $\Delta p$  on each wildtype amino acid (left), indicating if the wildtype amino acid is similar to alanine, then AS is not helpful probably because it gives less information. On the other hand, if the variant amino acid is similar to alanine, then AS helps to improve prediction accuracy (right).



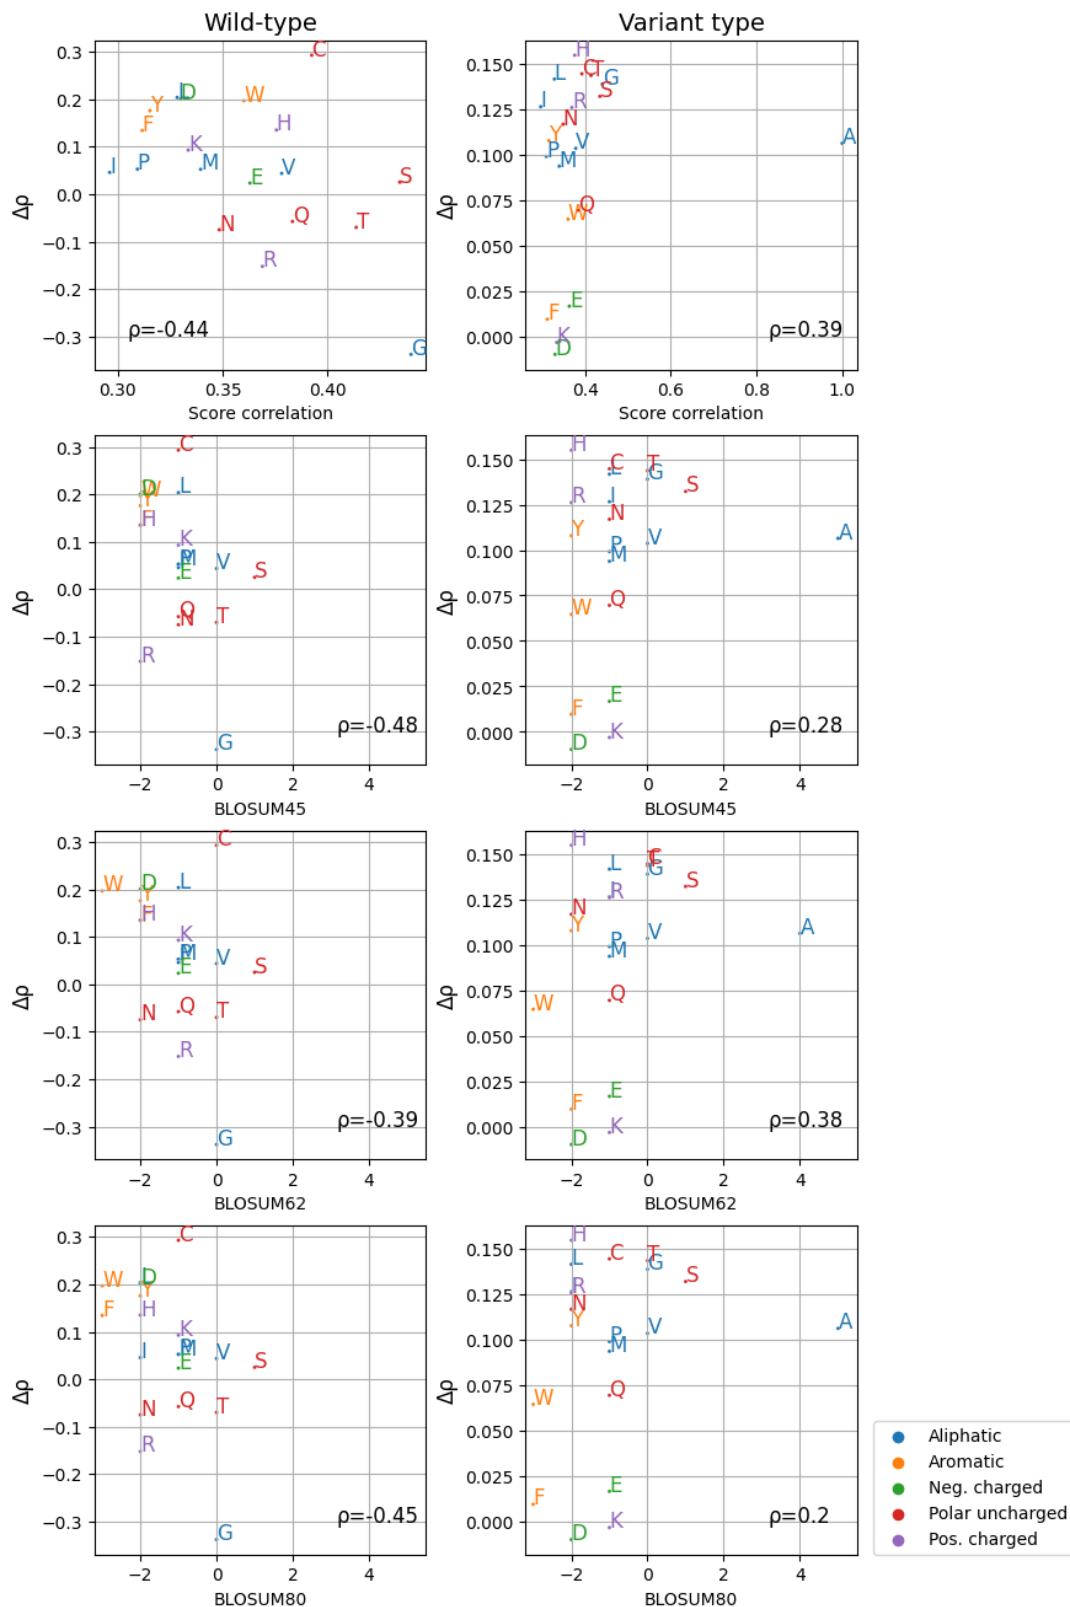

**Fig S15. Relationship between amino acid similarity and model performance.** For each amino acid, its similarity to alanine was computed by their DMS score correlation or using BLOSUM scores as shown on the x-axis. The performance improvement ( $\Delta p$ ) for each wild-type (left) or variant (right) amino acid while using AS data were computed as previously mentioned (Fig 7), with their Spearman's correlation against the similarity measurements shown on the figure.

The label for each amino acid is coloured by the amino acid physicochemical property. (Neg.: negatively; Pos.: positively)

- \* It would be nice to label panels in figure 7.

Thank you for pointing out this oversight. We have added panel labels to Figure 7.

- \* It also seems notable that predicting alanine substitutions is not the most improved - a brief comment on why would be interesting.

We added a sentence on line 209, saying:

*We also noticed that variants to alanine are not most improved, however we observed an overall trend showing higher improvement for amino acids that are physiochemically similar to alanine (Fig S15).*

- \* The AS model adds 2x20 parameters to the model for encoding, which is a lot if CCR5 is held out, as there are only a few hundred total independent residues evaluated. While the performance on held out proteins is a good standard, it would be interesting to evaluate the increase from model selection perspective (BIC/AIC or similar) if possible.

Thank you for this suggestion. It's an interesting way to determine if the extra AS data contributes to better predictor performance. However, there are some difficulties for applying this method to our analysis. First, AIC/BIC analysis considers all data at the same time and does not perform cross-validation, meaning we would have to re-run all our models. Second, as a model selection approach, it is more reasonable to compare AIC/BIC values for models without each protein feature rather than AS data alone, which is beyond the scope of this work. Finally, because of the sparsity of AS data, many protein residues have no AS data available, and we anticipate that AIC/BIC analysis will lose power in this case.

But overall, we agree that this an innovative way to construct an analysis and think this is worth a future study to fully explore the applications of model selection techniques to this kind of data.

- \* L217 The statement doesn't seem logical to me - if such advanced imputation methods were available surely they would be better used to impute all substitutions than just model alanine then use linear regression to model the rest?

This statement was referring to some previously published models for creating computationally predicted alanine scanning data. We have now removed this sentence to improve clarity.

\* L331-332 The formula used for regularising Spearman's rho makes sense, and can likely be interpreted as a regularizing prior, but we found it hard to understand its provenance and meaning from the reference. A sentence on its content (not just describing that it shrinks estimates) and a more specific reference would be useful for interested readers like ourselves.

We further explained the meaning of this formula by stating that (line 346):

We estimated the  $\rho$  value with the empirical copula, *which is related to the standard estimator by a factor of  $(n-1)/(n+1)$ .*

We also added a more specific reference for this statement (Bedő and Ong, 2016).

\* L364 It says correlation results were dropped when only one residue was available whereas in figure legends it says results with less than three residues were dropped. Notwithstanding thinking three is maybe too low a cutoff, these should be consistent or clarified slightly if I've misunderstood the meaning.

Thank you for bringing this up. The three-residue-threshold is only applied to the score correlation analysis (Fig 3&4), because if there are only two residues available the correlation between AS and DMS score of alanine substitutions can only be either 1 or -1.

For model evaluation, as you mentioned, we dropped data with only one residue, because in this case, we will usually have more than 20 variants to evaluate the model performance. To emphasize this, at the end of Fig 5, 6, S4, S5, S6, we explained that:

*Results for data pairs with only one residue are not shown.*

\* It would be nice to have a bit more comment on the purpose of the final supplementary section (Replacing AS data with DMS scores of alanine substitutions) - if you have DMS alanine results it seems likely you will have the other measurements anyway.

Thank you for this comment. We added a sentence to clarify the purpose of this experiment (line 954):

We investigated another potential approach to overcome the sparsity of AS data by replacing the AS feature with the DMS scores of alanine substitutions (DMS-Ala). *The intention of this study is to model the scenario of ideal AS data, which perfectly matches the DMS-Ala data during training.*

# 1 Integrating deep mutational scanning and low- 2 throughput mutagenesis data to predict the impact of 3 amino acid variants

4

## 5 Authors:

6 Yunfan Fu<sup>1,2</sup>, Justin Bedó<sup>1,3,2,\*</sup>, Anthony T. Papenfuss<sup>1,2,4,3,\*,\*\*</sup>, Alan F. Rubin<sup>1,2,\*,\*\*</sup>

7

## 8 Affiliations:

9 <sup>1</sup>The Walter and Eliza Hall Institute of Medical Research, Parkville, VIC 3052, Victoria, Australia.

10 <sup>2</sup>Department of Medical Biology, The University of Melbourne, Melbourne Parkville, VIC 3010, Australia.

11 ~~<sup>3</sup>School of Computing and Information Systems, The University of Melbourne, Melbourne, VIC 3010,~~  
12 ~~Australia.~~

13 <sup>4</sup>Peter MacCallum Cancer Centre, Melbourne, VIC 3000, Australia.

14

15 \* Contributed equally

16 \*\* To whom correspondence should be addressed (papenfuss@wehi.edu.au & alan.rubin@wehi.edu.au)

17

## 18 Abstract

19 **Background:** Evaluating the impact of amino acid variants has been a critical challenge for  
20 studying protein function and interpreting genomic data. High-throughput experimental  
21 methods like deep mutational scanning (DMS) can measure the effect of large numbers of  
22 variants in a target protein, but because DMS studies have not been performed on all proteins,  
23 researchers also model DMS data computationally to estimate variant impacts by predictors.

24 **Results:** In this study, we extended a linear regression-based predictor to explore whether  
25 incorporating data from alanine scanning (AS), a widely- used low-throughput mutagenesis  
26 method, would improve prediction results. To evaluate our model, we collected 146 AS  
27 datasets, mapping to 54 DMS datasets across 22 distinct proteins.

28 **Conclusions:** We show that improved model performance depends on the compatibility of the  
29 DMS and AS assays, and the scale of improvement is closely related to the correlation between  
30 DMS and AS results.

31

32 **Keywords:** deep mutational scanning, alanine scanning, machine learning, predictor

33

## 34 **1 Introduction**

35 Deep mutational scanning (DMS) is a functional genomics method that can experimentally  
36 measure the impact of many thousands of protein variants by combining high-throughput  
37 sequencing with a functional assay [1]. In a typical DMS, a cDNA library of genetic variants  
38 of a target gene is generated, containing all possible single amino acid substitutions. This  
39 variant library is then expressed in a functional assay system where the **DMS** variants can be  
40 selected based on their properties. The change in variant frequency in the pre- and post-  
41 selection populations is determined by high-throughput sequencing which is then used to  
42 calculate a multiplexed functional score that captures the variant's impact [2–4]. The versatility  
43 of DMS assays makes it possible to measure variant impact on a wide range of protein  
44 properties, including protein binding **affinity** [5,6], protein abundance [7–9], **catalyticenzyme**  
45 activity [10,11] and cell **growth-ratesurvival** [12–14]. So far, hundreds of DMS studies covering  
46 **tens of thousands of nucleotides have been published [15], and experiments targeting over a**  
47 **hundred additional genes are underway according to MaveRegistry [16].**

48

49 Computational studies have used DMS data to build predictive models of variant impact. These  
50 predictors use supervised or semi-supervised learning models trained on experimental DMS  
51 data and various protein features to make predictions ~~[15-21]~~[17-23]. Envision is one such  
52 method that used protein structural, physicochemical, and evolutionary features to predict  
53 variant effect scores and was trained on DMS data from 8 proteins using gradient boosting  
54 ~~[15]~~[17]. Another method, DeMaSk, predicted DMS scores by combining two evolutionary  
55 features (protein positional conservation and variant homologous frequency) with a DMS  
56 substitution matrix and was trained on data from 17 proteins using a linear model ~~[17]~~[19].  
57 Deep learning algorithms have also been applied to build protein fitness predictors  
58 ~~[16,18]~~[18,20], which are usually based only on variant sequences. [These variant effect](#)  
59 [predictors can also be benchmarked using DMS experimental results and assist in the](#)  
60 [interpretation of experimental data \[20,24,25\].](#)

61

62 Low-throughput mutagenesis experiments that measure tens of variants at a time have also  
63 been used extensively to study diverse protein properties, including substrate binding affinity  
64 ~~[22,23]~~[26,27], protein stability ~~[24,25]~~[28,29], and protein-specific ~~activity~~activities  
65 ~~[26,27]~~[30,31]. Alanine scanning (AS) is a widely-used low-throughput mutagenesis method  
66 ~~[28,29]~~[32,33], and AS data are available for many proteins. In this method, each targeted  
67 protein residue is substituted with alanine, and the impacts of these variants are measured by a  
68 functional assay ~~[30]~~[34]. AS experiments are typically used to identify functional hot spots or  
69 critical residues in the target protein ~~[31,32]~~[35,36] and have been used as a source of  
70 independent validation for DMS studies ~~[27,33-35]~~[31,37-39].

71

72 In this study, we explore whether a predictive model can be improved by incorporating low-  
73 throughput mutagenesis data (Fig 1). We find that AS data can increase prediction accuracy

74 and that the improvement is related to the similarity of the functional assays and the correlation  
75 of DMS and AS results.

76

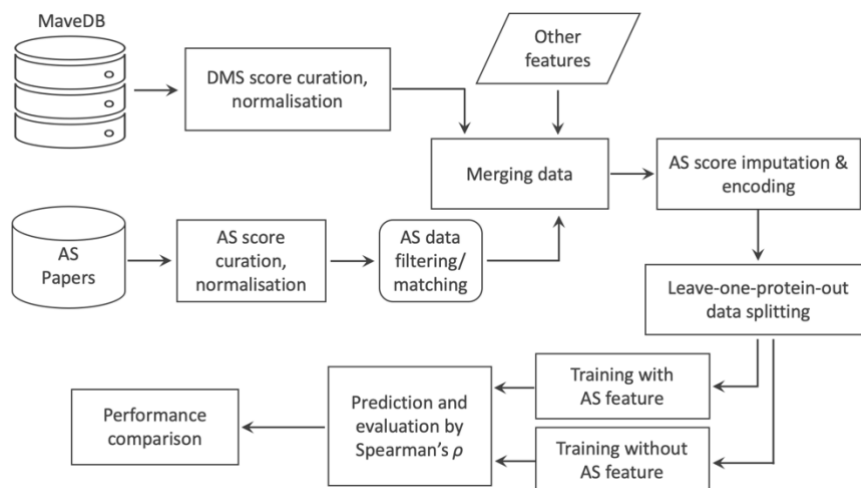

77

78 **Fig 1. Workflow for model training and testing.** DMS and AS datasets are collected from online resources and  
79 are normalized. DMS and AS datasets targeting the same protein are then matched, filtered and merged. Two  
80 predictors are constructed and tested: the first uses DMS data, AS data and other protein features, and the second  
81 uses only DMS data and the same other protein features.

82

## 83 2 Results

### 84 2.1 Overview of DMS and alanine scanning (AS) data

85 To build the predictive model, 130 DMS datasets were collected from MaveDB [36,37][40,41]  
86 (Supplementary table 1). We searched the literature and found 146 AS datasets targeting the  
87 same proteins as 54 of the DMS datasets. In total, we obtained both DMS and AS data for 22  
88 different proteins: 17 human proteins, three yeast proteins, and two bacterial proteins. Most  
89 DMS experiments were highly complete, with a mean coverage of 95.0% of all possible single  
90 amino acid substitutions assayed in the target region, comprising 373,219 total protein variant  
91 measurements. AS data were only available on a small number of protein residues (Fig 2), and  
92 we were able to curate 1,480 alanine substitution scores from the 146 studies. Variant scores



93 from collected DMS and AS studies were linearly normalized to a common scale (see Methods)  
 94 to make them comparable across datasets (Fig S1).

95

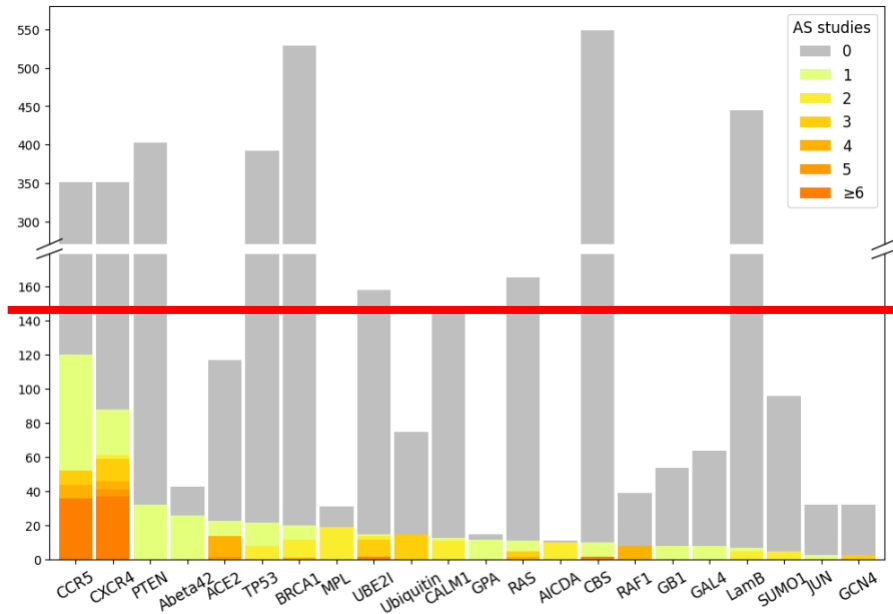

96

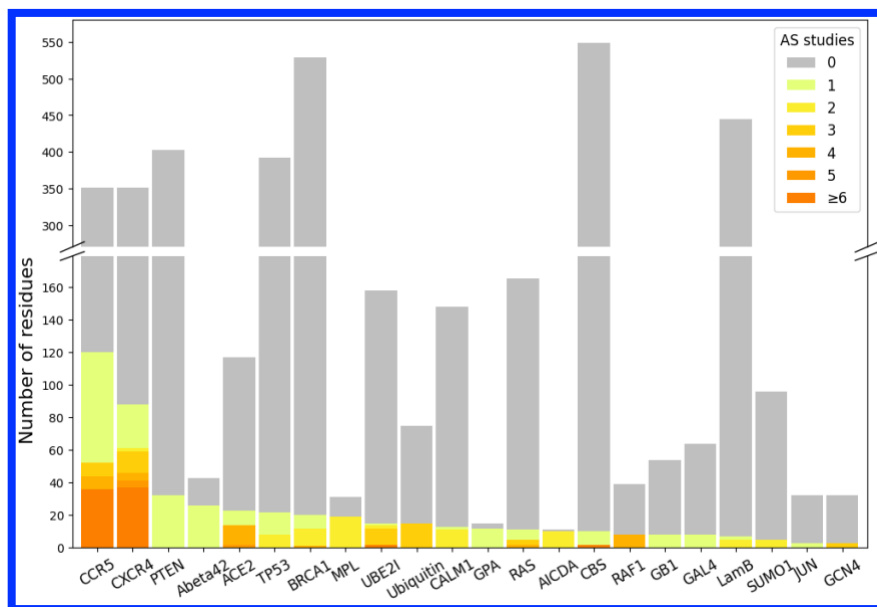

97  
 98

99 **Fig 2. DMS data generally cover more protein residues than AS data.** Each bar shows the number of residues  
 100 assayed by DMS studies on given target proteins. Colour indicates the number of AS studies available for the  
 101 DMS-tested residues.

102

## 103 2.2 The correlation of DMS and AS scores is related to assay compatibility

104 To evaluate the similarity of AS and DMS scores, we calculated Spearman's correlation ( $\rho$ )  
105 between the AS scores and DMS scores for the same alanine substitutions. Since each protein  
106 may have results from several AS and DMS experiments, we calculated  $\rho$  between each  
107 possible pair. The median  $\rho$  over DMS and AS data (DMS/AS) pairs was 0.2, indicating that  
108 the experimental scores were poorly correlated overall (Fig 3).

109

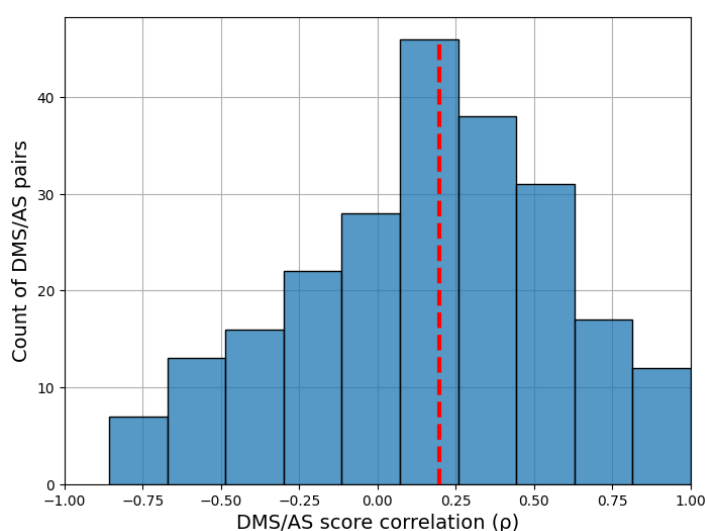

110

111 **Fig 3. Correlation between DMS and AS data shows substantial variation.** We calculated Spearman's  $\rho$   
112 between alanine substitution scores in each pair of AS and DMS data. The results for pairs with less than three  
113 alanine substitutions are ~~removed~~not shown. The red dashed line shows the median  $\rho$ .

114

115 We then considered if differences between AS and DMS assay designs might contribute to this  
116 low agreement between scores. To explore this, we developed a decision tree (Fig S2) to  
117 classify whether DMS/AS pairs had low, medium, or high assay compatibility, which we  
118 defined as a similarity measurement of the functional assays performed. For example, the DMS  
119 assay measuring the binding affinity of a cell surface protein, CXCR4, to its natural ligand  
120 [38][42] has high compatibility with the AS experiment also measuring this ligand binding but

121 has low compatibility with the study on CXCR4's ability to facilitate virus infection ~~[39]~~[43].  
122 A full assay compatibility table can be found in Supplementary Table 1 with the compatibility  
123 classifications and justification for each pair. We then compared DMS and AS score correlation  
124 for each compatibility class and found that score correlations were closely related to assay  
125 compatibility. Data from low compatibility assays had a median correlation of 0.15, rising to  
126 0.19 for medium compatibility assays and 0.40 for high compatibility assays (Fig 4). [This trend](#)  
127 [of increased correlation for high compatibility assay pairs holds across secondary structures](#)  
128 [\(Table S1\)](#). This link between assay compatibility and score correlation indicates that our  
129 decision tree approach was able to capture the similarity between assay systems.  
130

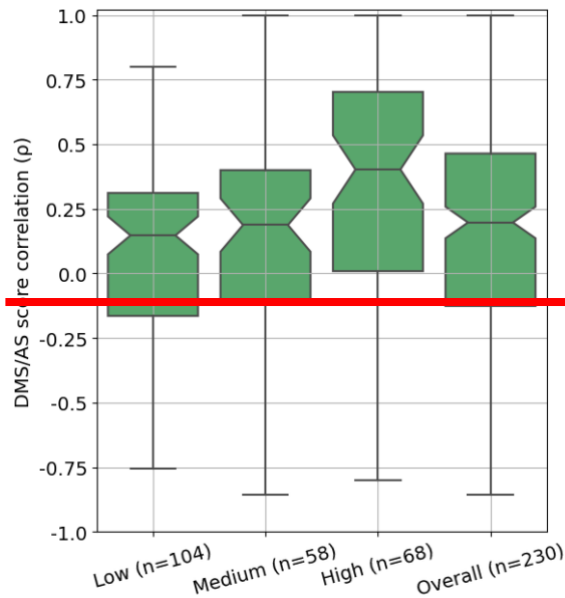

131

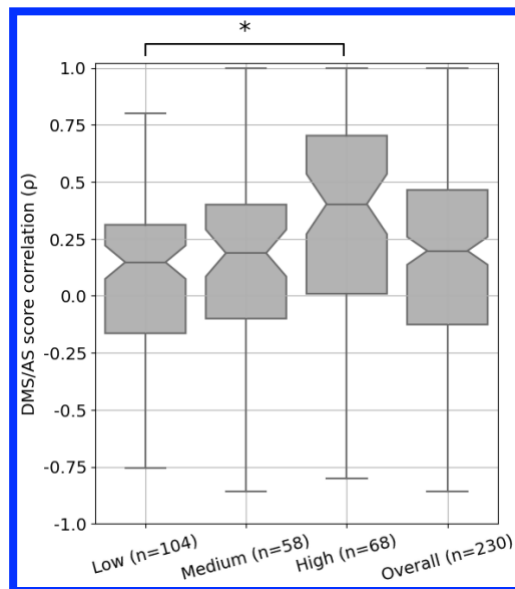

132

133 **Fig 4. DMS and AS data pairs with high assay compatibility show a higher score correlation.** Each box  
 134 **represents** shows the Spearman's  $\rho$  between DMS and AS data pairs for each level of **classified** assay compatibility  
 135 or **the** overall **result**. The correlation coefficients **are** were calculated between alanine substitution scores in each  
 136 pair of AS and DMS **data** sets. Results for **data** pairs with less than three alanine substitutions **are** were removed.  
 137 P-values calculated using Welch's test and corrected using Holm-Šidák, \*:  $p < 0.05$ ; notches show 95% confidence  
 138 interval around median, and whiskers show the full value range.

139

### 140 2.3 Compatible AS data improve DMS score prediction accuracy

141 To test if incorporating AS data into DMS score models would improve prediction accuracy,  
142 we decided to build a new model based on DeMaSk [17][19]. We chose DeMaSk because it  
143 showed better performance compared to similar methods and was straightforward to modify.  
144 The published DeMaSk model predicts DMS scores using protein positional conservation,  
145 variant homologous frequency, and substitution score matrix, and we incorporated AS data as  
146 an additional feature. Our new predictor was modelled with all 130 DMS we collected and we  
147 applied a leave-one-protein-out cross-validation approach to training and testing, avoiding  
148 information leakage for variants of the same protein target [15][17]. Prediction performance  
149 was evaluated using the Spearman's correlation ( $\rho$ ) between the experimentally-derived DMS  
150 scores and the predicted scores for each pair of DMS and AS studies. The performance of our  
151 DMS/AS model was compared with a model trained only on DMS data, equivalent to retrained  
152 DeMaSk (Fig S3), by calculating the change of prediction  $\rho$  (see Methods).

153

154 We trained our model with either all or a subset of AS data we collected (Fig 5, Table S2S4).  
155 We first integrated all 146 AS data collected for training and evaluation but observed only a  
156 modest improvement of prediction  $\rho$  (Fig 5 left box, and Fig S4). We then retrained and  
157 evaluated our model on filtered AS data with only high compatibility assays, and observed a  
158 median increase in prediction Spearman's  $\rho$  of 0.1 compared to the results with no AS data  
159 (Fig 5 middle box, and Fig S4). However, training with both high and medium compatibility  
160 pairs reduced the performance improvement (Fig S5). These results indicate that medium and  
161 low compatibility pairs might provide inconsistent training data, degrading model performance.  
162 We also evaluated the impact of including high compatibility AS data in an alternative model  
163 based on Envison [15][17], and found similar results (Fig S6). To differentiate between high  
164 assay compatibility and high DMS/AS score correlation, we trained the model using the most

165 highly correlated AS result for each DMS dataset (see Methods). Although the upper quartile  
166 was high, the median performance change of this predictor was lower than the high assay  
167 compatibility model, suggesting that matching with the highest score correlation alone is  
168 insufficient (Fig 5 right box). However, when applying a stricter threshold, the correlation  
169 matched models still show limited improvement (Fig S7). Additionally, to ensure the models  
170 performance is not biased by pseudo-replication of multiple datasets, we averaged DMS and  
171 AS scores that were part of the same study and type of assay, and saw similar results (Fig S8).  
172

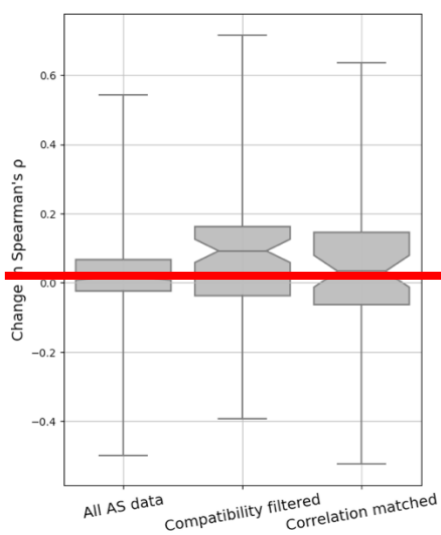

173

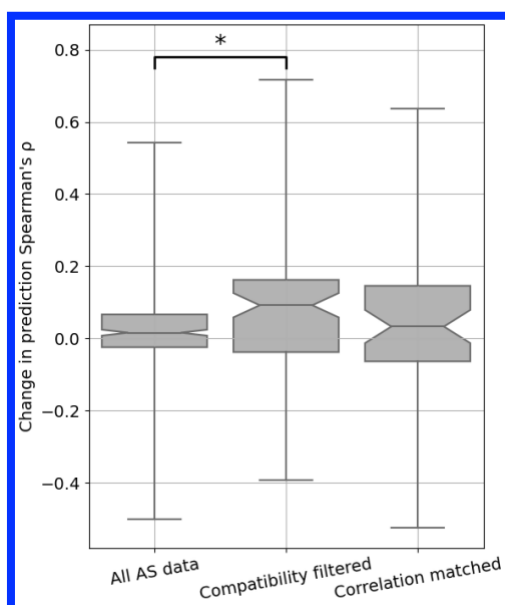

174

175 **Fig 5. Performance of variant impact prediction is improved using AS data with high assay compatibility.**

176 The change  $\rho$  in prediction  $\rho$  achieved by including the AS data feature for each DMS and AS data pair is shown  
177 as box plots. A higher value represents higher prediction accuracy achieved for using AS data. Different  
178 approaches to filtering/matching the data are shown on the x-axis: “All AS data” used all available data;  
179 “Compatibility filtered” used only data of high assay compatibility; “Correlation matched” used only data with  
180 the highest regularised correlation for each DMS dataset. Results for data pairs with only one residue are not  
181 shown. P-values were calculated using Welch’s test and jointly corrected using Holm-Šidák (Methods), \*:  $p < 0.05$ .  
182 Notches show the 95% confidence interval around the median, and whiskers show the full value range.

183

184 Our compatibility-filtered predictor shows improved prediction accuracy for these regions  
185 compared to not only the baseline model, but other widely used predictors as well (Fig S9). To  
186 further explore the higher performance of this compatibility-filtered predictor, we examined  
187 the relationship between prediction  $\rho$  change and score correlation for each high compatibility  
188 DMS/AS pair (Fig 6). For most pairs, prediction performance was improved by using AS data,  
189 and the scale of improvement was also related to the score correlation. This relationship could  
190 also be observed for multiple DMS/AS pairs from an individual protein, such as CXCR4 and  
191 CCR5. We saw the same trend in the predictor trained with all DMS/AS pairs but noted that  
192 the performance even of highly correlated pairs was worse, likely due to the influence of low  
193 compatibility training data on the model (Fig S10S7).

194

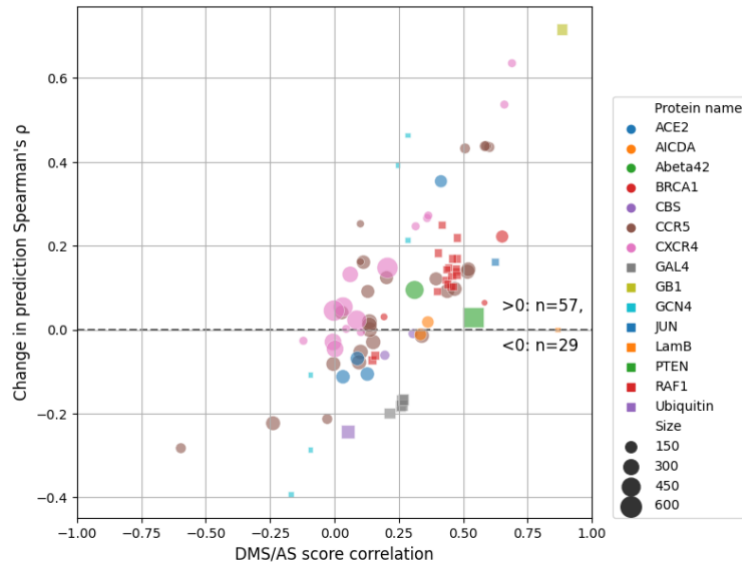

195

196 **Fig 6. Prediction performance change is related to DMS and AS score correlation.** Each dot represents a  
 197 filtered DMS/AS data pair of high assay compatibility. The vertical axis shows the change of prediction  $\rho$  by using  
 198 AS data (larger means higher performance achieved by using AS data). The horizontal axis shows the DMS/AS  
 199 score correlation for *all* variants on the matched residues rather than just alanine substitutions. The colours and  
 200 shapes of the dots correspond to the target protein, and size indicates the number of variants in each data pair.  
 201 Results for data pairs with only one residue are not shown.

202

203 We also explored the consequences of the sparsity of AS data on our model in ~~two~~three ways:  
 204 i) by training only with variants that have AS data available (Fig S11); ii) by using a boosting  
 205 approach that focuses only on residues with AS data (Fig S12S8) and iii) by using complete  
 206 alanine substitution information from DMS as the AS feature (Fig S13S9). ~~Both of these~~The  
 207 first approach gave lower absolute prediction performance, presumably because the model was  
 208 under-fitted due to the small number of variants. The last two approaches performed very  
 209 similarly to the primary model constructed using high-compatibility DMS/AS data and simple  
 210 mean score imputation.

211



212 To test the influence of amino acids on our predictor, we grouped the prediction results by  
213 either wild-type or variant amino acid and calculated the prediction improvement when AS  
214 data were included (Fig 7). We found that 14 of 19 wild-type amino acids performed better  
215 with the addition of AS data, with cysteine showing the largest improvement and performing  
216 worst in the model lacking AS data. 18 of 20 variant amino acids benefited from the inclusion  
217 of AS data, with marginal performance decrease on lysine and aspartic acid ( $|\Delta\rho|<0.01$ ) (Fig  
218 7). We also noticed that variants to alanine are not most improved, however we observed an  
219 overall trend showing higher improvement for amino acids that are physiochemically similar  
220 to alanine (Fig S15).

221

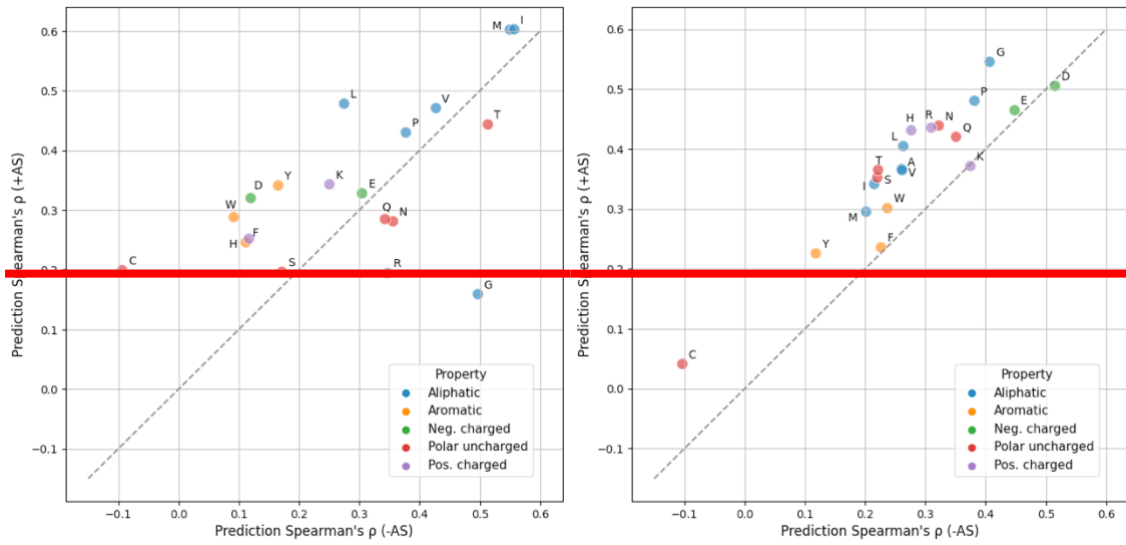

222

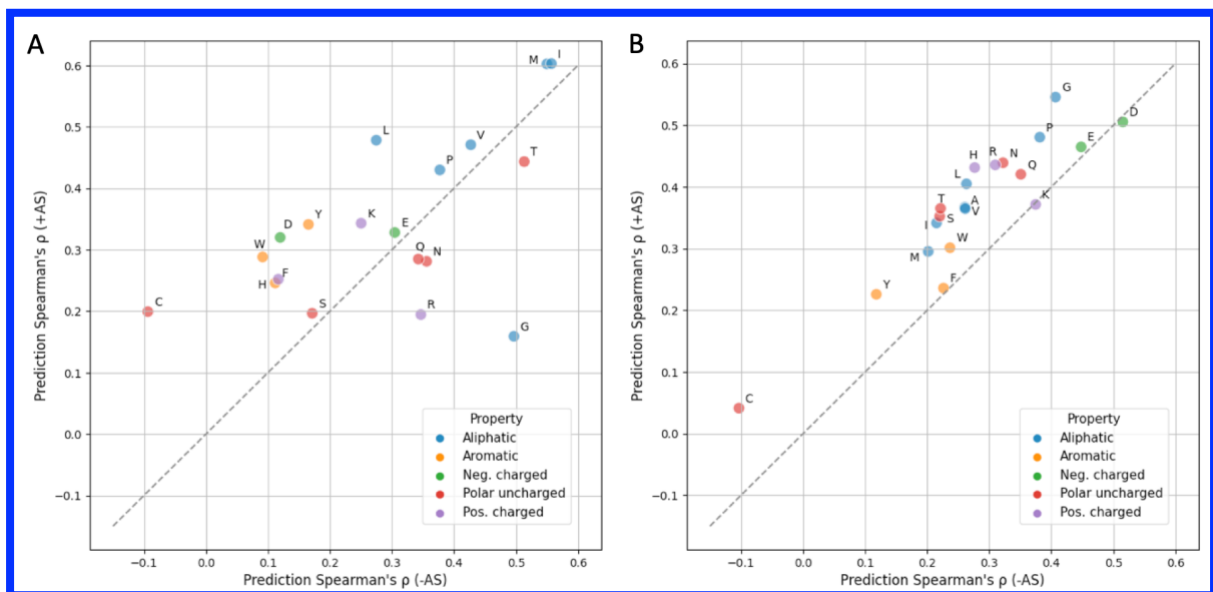

223

224 **Fig 7. Model performance is generally improved for each wild-type and variant amino acid.**

225 Prediction Spearman's  $\rho$  when using (y-axis) or not using (x-axis) AS data on each wild-type (left **A**) or variant

226 (right **B**) amino acid is shown in the scatter plots. The results are coloured according to the property of each amino

227 acid type. Alanine (A) result is not applicable in the first figure since alanine scanning data are always missing

228 when the wildtype is alanine itself. Absolute count for each amino acid can be found in Fig S14S10. (Neg.: negatively, Pos.: positively)

229

230

### 231 **3 Discussion**

232 In this study, we integrated alanine scanning (AS) data into deep mutational scanning (DMS)  
233 score prediction, leading to modest improvements in the accuracy of variant score prediction.  
234 We also explored the impact of the diversity of protein properties measured by DMS and AS.  
235 Filtering DMS and AS data based on our manual classification of assay type compatibility led  
236 to improved prediction performance.

237

238 A potential shortcoming of our current approach is that AS data were available for only a small  
239 proportion of the DMS data. Although most recent DMS studies can analyze variants of the  
240 whole protein, most AS experiments only cover a handful of residues in the target protein,  
241 leaving missing AS scores for the vast majority of residues. We explored this here and found  
242 that alternative methods for addressing the sparsity of AS data did not improve or degrade  
243 performance, but we anticipate further improved prediction accuracy if the low completeness  
244 and unevenness of AS data are appropriately handled before modelling, ~~such as by advanced~~  
245 ~~imputation methods [48,49].~~

246

247 In this study, we identified the importance of DMS/AS assay compatibility as a crucial factor  
248 for improving prediction accuracy. An issue with using this concept is that it further shrinks  
249 already sparse data. It also fails to take advantage of the fact that even for low compatible  
250 assays some fundamental information like protein ~~stability~~abundance can still be mutually  
251 captured. Instead of hard filtering, proper implementation of this underlying information may  
252 facilitate variant impact prediction in the future. Nonetheless, filtering on assay compatibility  
253 still leads to performance improvement. We also briefly explored whether the consistency of  
254 DMS and AS scores can be considered more directly by matching the best correlated AS data  
255 for each DMS dataset. Consistency is partially driven by assay compatibility but also reflects

256 other features of the data, such as bias and noise. ~~While we picked the most correlated pair for~~  
257 ~~each DMS, we did not threshold the correlation, potentially including data pairs that were poor~~  
258 ~~matches.~~

259

260 The concepts of compatibility and data quality are also relevant to training any DMS-based  
261 predictors. DMS assays have been developed to measure variant impacts to distinct protein  
262 properties, and a variant can behave similarly to wildtype when measured by one assay yet  
263 show altered protein properties in other assay results, which are frequently found in regions  
264 with specific biochemical functions [50–55][25,52–56]. With more experimental assays to be  
265 applied, the diverse measurements may impede the progress of future DMS-based predictors  
266 unless this assay effect is properly addressed, for example, by building assay specific predictors.  
267 Measurement error is another source of DMS data heterogeneity that potentially affects the  
268 model performance. In our current study, DMS scores of protein variants are weighted equally  
269 while training. Adjustable weighting can be applied in future studies to adapt the distinct  
270 experimental error between individual variants and datasets, reducing the influence of low-  
271 confident data.

272

273 In summary, we conclude that the careful inclusion of low-throughput mutagenesis data  
274 improves the prediction of DMS scores, and the approaches described here can potentially be  
275 applied to other prediction methods.

276

#### 277 **4 Availability of supporting source code and requirements**

278 **Project name:** DMS\_with\_Alanine\_scan

279 **Project home page:** [https://github.com/PapenfussLab/DMS\\_with\\_Alanine\\_scan](https://github.com/PapenfussLab/DMS_with_Alanine_scan)

280 **Operating system:** Platform independent

281 **Programming language:** Python

282 **Other requirements:** Python 3.10.~~6~~ or higher

283 **Licence:** MIT Licence

284

## 285 **5 List of abbreviations**

286 DMS: deep mutational scanning

287 AS: alanine scanning

288

## 289 **6 Supporting information**

290 **Supplementary Table 1:** All candidate DMS and alanine scanning data with detailed dataset  
291 information.

292 **Supplementary Table 2:** Normalized DMS dataset with protein property features.

293 **Supplementary Table 3:** Normalized alanine scanning dataset.

294

## 295 **7 Author contributions**

296 YF developed the software and wrote the initial draft of the manuscript. AFR conceived the  
297 study. JB, AFR, and ATP oversaw the project. All authors reviewed, contributed to, and  
298 approved the manuscript.

299

## 300 **8 Funding**

301 YF is supported by Melbourne Research Scholarship. ATP was supported by an  
302 Australian National Health and Medical Research Council (NHMRC) Senior Research  
303 Fellowship (1116955). JB, AFR and ATP were supported by the Lorenzo and Pamela Galli  
304 Medical Research Trust. JB and ATP were supported by the Stafford Fox Medical Research

305 Foundation. AFR was supported by the National Human Genome Research Institute of the NIH  
306 under award numbers RM1HG010461 and UM1HG011969. The research benefitted from  
307 support from the Victorian State Government Operational Infrastructure Support and  
308 Australian Government NHMRC Independent Research Institute Infrastructure Support.

309

## 310 **9 Methods**

### 311 **9.1 DMS data collection**

312 DMS data were downloaded from MaveDB ~~[36,37]~~[40,41] which were then filtered and  
313 curated. DMS experiments targeting antibody and virus proteins were removed because of their  
314 potentially unique functionality. We retrieved the UniProt accession ID of target proteins by  
315 searching the protein names or sequences in UniProt ~~[56]~~[57], and proteins lacking available  
316 UniProt ID were also excluded. Datasets that are computationally processed or their wildtype-  
317 like and nonsense-like scores (see Normalization) cannot be identified were also filtered out  
318 (Supplementary Table 1). All missense variants with only a single amino acid substitution were  
319 curated from the DMS studies for our analysis. A total of 130 DMS experiments from 53  
320 studies ~~[5,6,9-14,27,33-35,38,57-94]~~[5,6,9-14,24,31,37-39,42,58-94] were collected for our  
321 analysis.

322

### 323 **9.2 Collection of AS data and other features**

324 The following process was used to search for candidate AS studies. Papers were identified by  
325 searching on PubMed and Google Scholar for the “alanine scan” or “alanine scanning” together  
326 with the name of candidate proteins. While searching in Google Scholar, we included the  
327 protein’s UniProt ID rather than molecule name as the search term to reduce false positives.  
328 Appropriate AS data were collected from the search results. Western blot results were  
329 transformed to values by ImageJ if it was the only experimental data available in the study. A

330 total 146 AS experiments were collected from 45 distinct studies ~~[22–24,26,27,39–~~  
331 ~~42,44,45,84,95–127]~~[26–28,30,31,43–46,48,49,84,95–127].

332 Protein features of Shannon entropy and the logarithm of variant amino acid frequency were  
333 downloaded from the DeMaSk online toolkit ~~[17]~~[19]. The substitution score matrix feature  
334 was calculated from the mean of training DMS scores for each of the 380 possible amino acid  
335 substitutions before each iteration of cross-validation.

336

### 337 **9.3 Normalization**

338 DMS and AS datasets were normalized to a common scale using the following approach  
339 adapted from previous studies ~~[15,43]~~[17,47]. Let  $D$  denotes a protein study measuring scores  
340  $s_i^D$  for a single variant  $i$ ,  $s_{wt}^D$  denotes the scores for wildtype and  $s_{non}^D$  represents the score for  
341 nonsense-like variants. The normalized scores  $s_i'^D$  are given by:

$$342 \quad s_i'^D := \frac{s_i^D - s_{wt}^D}{s_{wt}^D - s_{non}^D} + 1$$

343 Wild-type scores were directly identified from the paper or the median score of synonymous  
344 variants. For DMS data, since not all DMS studies report score of nonsense variants, we defined  
345 the nonsense-like scores as the median DMS scores for the 1% missense variants with the  
346 strongest loss of function for each dataset. For AS data, nonsense-like scores were either  
347 defined according to the paper or using the extreme values (Supplementary Table 1).

348

### 349 **9.4 AS data filtering and matching**

350 AS data subsets were filtered/matched according to either assay compatibility or score  
351 correlation. For assay compatibility filtering, we first categorized each DMS ~~and~~ AS assay  
352 by the protein property or function using the following assay types: binding affinity, enzyme  
353 activity, protein abundance, cell survival, pathogen infection, drug response, ability to perform

354 a novel function, or other protein-specific activities (e.g., transcription activity for transcription  
355 factors) (Supplementary Table 1). The DMS/AS assay pairs were ~~first~~then classified into three  
356 levels of compatibility based on these categories (Fig S2). For each DMS dataset, we first tried  
357 to use only AS data with high assay compatibility for further modelling, removing AS data of  
358 medium and low assay compatibility. We then also tried to model with AS data of both high  
359 and medium assay compatibility.

360 For score correlation matching, Spearman's correlation ( $\rho$ ) is calculated between alanine  
361 substitution scores in each pair of AS and DMS data. To avoid influence from the size of AS  
362 datasets, we ~~regularised~~estimated the  $\rho$  value ~~by~~with the empirical copula, which is related to  
363 the standard estimator by a factor of  $(n-1)/(n+1)$  [128,129]:

$$364 \quad \rho_r := \rho \times \frac{n-1}{n+1}$$

365 where  $\rho_r$  is the regularised correlation coefficient, and  $n$  is the number of alanine substitutions  
366 used for correlation calculation. For each DMS dataset, AS result with the highest  $\rho_r$  was  
367 picked for modelling.

368

## 369 **9.5 AS data pre-processing**

370 AS data were pre-processed prior to modelling. For variants without available  
371 (filtered/matched) AS data, their AS scores were imputed with the mean value of all available  
372 AS scores across all studies. Then the AS data were encoded by the wild-type and variant  
373 amino acid type with one-hot-encoding. For each variant, the AS feature is expanded with two  
374 one-hot vectors. Each of the vectors has 19 zeros and one non-zero value which was the AS  
375 score, with the location of the non-zero value indicating the wild-type or variant amino acid  
376 type.

377



## 378 9.6 Training and evaluation of DMS score predictor

379 To build the predictors, we performed linear regression using the function  
380 `sklearn.linear_model.LinearRegression` from scikit-learn [129][130]. Training  
381 and validation data were separated with leave-one-protein-out cross-validation. In this process,  
382 data from one protein were withheld for subsequent validation, and the rest were used for  
383 training. This process was iterated over all proteins in the data. Variants were inversely  
384 weighted during the training process by the number of measurements available, thus  
385 compensating for some regions having greater coverage with DMS and AS assays. Predictors  
386 were trained on protein features, DMS data and (optionally) AS data using four different  
387 filtering or matching strategies: i) all DMS/AS data, ii) compatibility-filtered DMS/AS data,  
388 iii) correlation-matched DMS/AS data, and iv) a control, constructed using DMS data only.

389 In the evaluation process, let  $V$  be protein variants assayed by both DMS study  $D$  and AS study  
390  $A$ . Variant scores are predicted by the previously mentioned predictors either using AS data  
391 ( $\hat{s}_V^A$ ) or not ( $\hat{s}_V$ ). Spearman's correlation ( $\rho$ ) was calculated between the DMS scores  $s_V^D$  and  
392 each set of predicted scores. The difference of  $\rho$  was used to evaluate the performance change  
393 ( $\Delta\rho_V$ ).

$$394 \quad \rho_V^A = \text{Spearman's correlation}(\hat{s}_V^A, s_V^D)$$

$$395 \quad \rho_V = \text{Spearman's correlation}(\hat{s}_V, s_V^D)$$

$$396 \quad \Delta\rho_V = \rho_V^A - \rho_V$$

397 To evaluate, we iterated over variants from each pair of DMS/AS studies. Results were dropped  
398 for variants  $V$  with only one protein residue available during analysis and visualization. Model  
399 performance was compared using the following statistical tests. Results in Fig 5 & Fig S5 were  
400 tested with Welch's test, and results in Fig S4 & Fig S6 were tested with paired t-tests. The p-  
401 values were jointly corrected using the Holm-Šidák method. The 95% confidence interval of  
402 median values are calculated by Gaussian-based asymptotic approximation [131].

403

## 404 **9.7 Prediction with other variant effect predictors**

405 For PROVEAN [132] and SIFT [133], prediction results on target variants were directly  
406 downloaded from the pre-calculated database for PROVEAN. For PolyPhen-2 [134] and  
407 GEMME [135], variant scores were computed through their online toolkits, using the default  
408 settings. ESM-1v [136] was set up locally and run according to its examples and  
409 documentations. EVE [137] results were collected from their pre-calculated database and a  
410 benchmarking study [138].

411

## 412 **10 References**

- 413 1. Fowler DM, Fields S. Deep mutational scanning: a new style of protein science. *Nature*  
414 *Methods*. 2014; doi: 10.1038/nmeth.3027.
- 415 2. Findlay GM. Linking genome variants to disease: scalable approaches to test the functional  
416 impact of human mutations. *Human Molecular Genetics*. 2021; doi: 10.1093/hmg/ddab219.
- 417 3. Geck RC, Boyle G, Amorosi CJ, Fowler DM, Dunham MJ. Measuring Pharmacogene Var-  
418 iant Function at Scale Using Multiplexed Assays. *Annual Review of Pharmacology and Toxi-*  
419 *cology*. 2022; doi: 10.1146/annurev-pharmtox-032221-085807.
- 420 4. Weile J, Roth FP. Multiplexed assays of variant effects contribute to a growing genotype-  
421 phenotype atlas. *Hum Genet*. 2018; doi: 10.1007/s00439-018-1916-x.
- 422 5. Diss G, Lehner B. The genetic landscape of a physical interaction. *eLife*. 2018; doi:  
423 10.7554/eLife.32472.

- 424 6. Fowler DM, Araya CL, Fleishman SJ, Kellogg EH, Stephany JJ, Baker D, et al.. High-  
425 resolution mapping of protein sequence-function relationships. *Nature Methods*. 2010; doi:  
426 10.1038/nmeth.1492.
- 427 7. Amorosi CJ, Chiasson MA, McDonald MG, Wong LH, Sitko KA, Boyle G, et al.. Mas-  
428 sively parallel characterization of CYP2C9 variant enzyme activity and abundance. *The Ameri-  
429 can Journal of Human Genetics*. 2021; doi: 10.1016/j.ajhg.2021.07.001.
- 430 8. Faure AJ, Domingo J, Schmiedel JM, Hidalgo-Carcedo C, Diss G, Lehner B. Mapping the  
431 energetic and allosteric landscapes of protein binding domains. *Nature*. 2022; doi:  
432 10.1038/s41586-022-04586-4.
- 433 9. Matreyek KA, Starita LM, Stephany JJ, Martin B, Chiasson MA, Gray VE, et al.. Multiplex  
434 assessment of protein variant abundance by massively parallel sequencing. *Nature Genetics*.  
435 2018; doi: 10.1038/s41588-018-0122-z.
- 436 10. Mighell TL, Evans-Dutson S, O’Roak BJ. A Saturation Mutagenesis Approach to Under-  
437 standing PTEN Lipid Phosphatase Activity and Genotype-Phenotype Relationships. *The  
438 American Journal of Human Genetics*. 2018; doi: 10.1016/j.ajhg.2018.03.018.
- 439 11. Stiffler MA, Hekstra DR, Ranganathan R. Evolvability as a Function of Purifying Selection  
440 in TEM-1  $\beta$ -Lactamase. *Cell*. 2015; doi: 10.1016/j.cell.2015.01.035.
- 441 12. Ahler E, Register AC, Chakraborty S, Fang L, Dieter EM, Sitko KA, et al.. A Combined  
442 Approach Reveals a Regulatory Mechanism Coupling Src’s Kinase Activity, Localization, and  
443 Phosphotransferase-Independent Functions. *Molecular Cell*. 2019; doi:  
444 10.1016/j.molcel.2019.02.003.

445 13. Giacomelli AO, Yang X, Lintner RE, McFarland JM, Duby M, Kim J, et al.. Mutational  
446 processes shape the landscape of TP53 mutations in human cancer. *Nature Genetics*. Nature  
447 Publishing Group; 2018; doi: 10.1038/s41588-018-0204-y.

448 14. Roscoe BP, Thayer KM, Zeldovich KB, Fushman D, Bolon DNA. Analyses of the Effects  
449 of All Ubiquitin Point Mutants on Yeast Growth Rate. *Journal of Molecular Biology*. 2013;  
450 doi: 10.1016/j.jmb.2013.01.032.

451 15. Tabet D, Parikh V, Mali P, Roth FP, Claussnitzer M. Scalable Functional Assays for the  
452 Interpretation of Human Genetic Variation. *Annu Rev Genet*. 2022; doi: 10.1146/annurev-  
453 genet-072920-032107.

454 16. Kuang D, Weile J, Kishore N, Nguyen M, Rubin AF, Fields S, et al.. MaveRegistry: a  
455 collaboration platform for multiplexed assays of variant effect. Lu Z, editor. *Bioinformatics*.  
456 2021; doi: 10.1093/bioinformatics/btab215.

457 ~~15~~.17. Gray VE, Hause RJ, Luebeck J, Shendure J, Fowler DM. Quantitative Missense Variant  
458 Effect Prediction Using Large-Scale Mutagenesis Data. *Cell Systems*. 2018; doi:  
459 10.1016/j.cels.2017.11.003.

460 ~~16~~.18. Alley EC, Khimulya G, Biswas S, AlQuraishi M, Church GM. Unified rational protein  
461 engineering with sequence-based deep representation learning. *Nat Methods*. 2019; doi:  
462 10.1038/s41592-019-0598-1.

463 ~~17~~19. Munro D, Singh M. DeMaSk: a deep mutational scanning substitution matrix and its use  
464 for variant impact prediction. Xu J, editor. *Bioinformatics*. 2020; doi:  
465 10.1093/bioinformatics/btaa1030.

466 [1820](#). Biswas S, Khimulya G, Alley EC, Esvelt KM, Church GM. Low- N protein engineering  
467 with data-efficient deep learning. *Nature Methods*. Nature Publishing Group; 2021; doi:  
468 10.1038/s41592-021-01100-y.

469 [1921](#). Høie MH, Cagiada M, Beck Frederiksen AH, Stein A, Lindorff-Larsen K. Predicting and  
470 interpreting large-scale mutagenesis data using analyses of protein stability and conserva-tion.  
471 *Cell Reports*. 2022; doi: 10.1016/j.celrep.2021.110207.

472 [2022](#). Wu Y, Li R, Sun S, Weile J, Roth FP. Improved pathogenicity prediction for rare human  
473 missense variants. *The American Journal of Human Genetics*. 2021; doi:  
474 10.1016/j.ajhg.2021.08.012.

475 [2123](#). Hsu C, Nisonoff H, Fannjiang C, Listgarten J. Learning protein fitness models from  
476 evolutionary and assay-labeled data. *Nat Biotechnol*. 2022; doi: 10.1038/s41587-021-01146-5.

477 [24](#). Findlay GM, Daza RM, Martin B, Zhang MD, Leith AP, Gasperini M, et al.. Accurate  
478 classification of BRCA1 variants with saturation genome editing. *Nature*. 2018; doi:  
479 10.1038/s41586-018-0461-z.

480 [25](#). Cagiada M, Bottaro S, Lindemose S, Schenstrøm SM, Stein A, Hartmann-Petersen R, et  
481 al.. Discovering functionally important sites in proteins. *bioRxiv*;

482 [2226](#). Block C, Janknecht R, Herrmann C, Nassar N, Wittinghofer A. Quantitative structure-  
483 activity analysis correlating Ras/Raf interaction in vitro to Raf activation in vivo. *Nature Struc-*  
484 *tural Biology*. Nature Publishing Group; 1996; doi: 10.1038/nsb0396-244.

485 [2327](#). Sloan DJ, Hellinga HW. Dissection of the protein G B1 domain binding site for human  
486 IgG Fc fragment. *Protein Science*. 1999; doi: 10.1110/ps.8.8.1643.

487 [2428](#). Fleming KG, Engelman DM. Specificity in transmembrane helix–helix interactions can  
488 define a hierarchy of stability for sequence variants. PNAS. National Academy of Sciences;  
489 2001; doi: 10.1073/pnas.251367498.

490 [2529](#). Shibata Y, White JF, Serrano-Vega MJ, Magnani F, Aloia AL, Grisshammer R, et al..  
491 Thermostabilization of the Neurotensin Receptor NTS1. Journal of Molecular Biology. 2009;  
492 doi: 10.1016/j.jmb.2009.04.068.

493 [2630](#). Brzovic PS, Heikaus CC, Kisselev L, Vernon R, Herbig E, Pacheco D, et al.. The Acidic  
494 Transcription Activator Gcn4 Binds the Mediator Subunit Gal11/Med15 Using a Simple Pro-  
495 tein Interface Forming a Fuzzy Complex. Molecular Cell. 2011; doi:  
496 10.1016/j.molcel.2011.11.008.

497 [2731](#). Gajula KS, Huwe PJ, Mo CY, Crawford DJ, Stivers JT, Radhakrishnan R, et al.. High-  
498 throughput mutagenesis reveals functional determinants for DNA targeting by activation-  
499 induced deaminase. Nucleic Acids Research. 2014; doi: 10.1093/nar/gku689.

500 [2832](#). Kortemme T, Kim DE, Baker D. Computational Alanine Scanning of Protein-Protein In-  
501 terfaces. Science's STKE. American Association for the Advancement of Science; 2004; doi:  
502 10.1126/stke.2192004pl2.

503 [2933](#). Morrison KL, Weiss GA. Combinatorial alanine-scanning. Current Opinion in Chemical  
504 Biology. 2001; doi: 10.1016/S1367-5931(00)00206-4.

505 [3034](#). Cunningham BC, Wells JA. High-resolution epitope mapping of hGH-receptor interac-  
506 tions by alanine-scanning mutagenesis. Science. American Association for the Advancement  
507 of Science; 1989; doi: 10.1126/science.2471267.

508 [3135](#). DeLano WL. Unraveling hot spots in binding interfaces: progress and challenges. *Current Opinion in Structural Biology*. 2002; doi: 10.1016/S0959-440X(02)00283-X.

509

510 [3236](#). Eustache S, Leprince J, Tufféry P. Progress with peptide scanning to study structure-  
511 activity relationships: the implications for drug discovery. *Expert Opinion on Drug Discovery*.  
512 2016; doi: 10.1080/17460441.2016.1201058.

513 [3337](#). Olson CA, Wu NC, Sun R. A Comprehensive Biophysical Description of Pairwise Epi-  
514 stasis throughout an Entire Protein Domain. *Current Biology*. 2014; doi:  
515 10.1016/j.cub.2014.09.072.

516 [3438](#). Staller MV, Holehouse AS, Swain-Lenz D, Das RK, Pappu RV, Cohen BA. A High-  
517 Throughput Mutational Scan of an Intrinsically Disordered Acidic Transcriptional Activation  
518 Domain. *Cell Systems*. 2018; doi: 10.1016/j.cels.2018.01.015.

519 [3539](#). Gray VE, Sitko K, Kameni FZN, Williamson M, Stephany JJ, Hasle N, et al.. Elucidat-  
520 ing the Molecular Determinants of A $\beta$  Aggregation with Deep Mutational Scanning. *G3 (Bethesda)*. 2019; doi: 10.1534/g3.119.400535.

521

522 [3640](#). Esposito D, Weile J, Shendure J, Starita LM, Papenfuss AT, Roth FP, et al.. MaveDB:  
523 an open-source platform to distribute and interpret data from multiplexed assays of variant ef-  
524 fect. *Genome Biol*. 2019; doi: 10.1186/s13059-019-1845-6.

525 [3741](#). Rubin AF, Min JK, Rollins NJ, Da EY, Esposito D, Harrington M, et al.. MaveDB v2: a  
526 curated community database with over three million variant effects from multiplexed  
527 functional assays. *bioRxiv*;

528 [3842](#). Heredia JD, Park J, Brubaker RJ, Szymanski SK, Gill KS, Procko E. Mapping Interac-  
529 tion Sites on Human Chemokine Receptors by Deep Mutational Scanning. *The Journal of Im-*  
530 *munology*. American Association of Immunologists; 2018; doi: 10.4049/jimmunol.1800343.

531 [3943](#). Tian S, Choi W-T, Liu D, Pesavento J, Wang Y, An J, et al.. Distinct Functional Sites  
532 for Human Immunodeficiency Virus Type 1 and Stromal Cell-Derived Factor 1 $\alpha$  on CXCR4  
533 Transmembrane Helical Domains. *JVI*. 2005; doi: 10.1128/JVI.79.20.12667-12673.2005.

534 [4044](#). Chabot DJ, Zhang P-F, Quinnan GV, Broder CC. Mutagenesis of CXCR4 Identifies  
535 Important Domains for Human Immunodeficiency Virus Type 1 X4 Isolate Envelope-  
536 Mediated Membrane Fusion and Virus Entry and Reveals Cryptic Coreceptor Activity for R5  
537 Isolates. *J Virol*. 1999; doi: 10.1128/JVI.73.8.6598-6609.1999.

538 [4145](#). Han DP, Penn-Nicholson A, Cho MW. Identification of critical determinants on ACE2  
539 for SARS-CoV entry and development of a potent entry inhibitor. *Virology*. 2006; doi:  
540 10.1016/j.virol.2006.01.029.

541 [4246](#). Fujita-Yoshigaki J, Shirouzu M, Ito Y, Hattori S, Furuyama S, Nishimura S, et al.. A  
542 Constitutive Effector Region on the C-terminal Side of Switch I of the Ras Protein. *J Biol*  
543 *Chem*. American Society for Biochemistry and Molecular Biology; 1995; doi:  
544 10.1074/jbc.270.9.4661.

545 [4347](#). Gray VE, Hause RJ, Fowler DM. Analysis of Large-Scale Mutagenesis Data To Assess  
546 the Impact of Single Amino Acid Substitutions. *Genetics*. 2017; doi:  
547 10.1534/genetics.117.300064.



548 [4448](#). Hidalgo P, Ansari AZ, Schmidt P, Hare B, Simkovich N, Farrell S, et al.. Recruitment  
549 of the transcriptional machinery through GAL11P: structure and interactions of the GAL4  
550 dimerization domain. *Genes Dev.* 2001; doi: 10.1101/gad.873901.

551 [4549](#). Rodríguez-Escudero I, Oliver MD, Andrés-Pons A, Molina M, Cid VJ, Pulido R. A  
552 comprehensive functional analysis of PTEN mutations: implications in tumor- and autism-  
553 related syndromes. *Human Molecular Genetics.* 2011; doi: 10.1093/hmg/ddr337.

554 [4650](#). Schröter C, Günther R, Rhiel L, Becker S, Toleikis L, Doerner A, et al.. A generic ap-  
555 proach to engineer antibody pH-switches using combinatorial histidine scanning libraries and  
556 yeast display. *mAbs.* 2015; doi: 10.4161/19420862.2014.985993.

557 [4751](#). Starace DM, Bezanilla F. Histidine Scanning Mutagenesis of Basic Residues of the S4  
558 Segment of the Shaker K<sup>+</sup> Channel. *J Gen Physiol.* 117:469–902001;

559 ~~[48](#). Stekhoven DJ, Buhlmann P. MissForest—non parametric missing value imputation for  
560 mixed type data. *Bioinformatics.* 2012; doi: 10.1093/bioinformatics/btr597.~~

561 ~~[49](#). Wu Y, Weile J, Cote AG, Sun S, Knapp J, Verby M, et al.. A web application and service  
562 for imputing and visualizing missense variant effect maps. Schwartz R, editor. *Bioinformatics.*  
563 [2019](#); doi: 10.1093/bioinformatics/btz012.~~

564 [5052](#). Cagiada M, Johansson KE, Valanciute A, Nielsen SV, Hartmann-Petersen R, Yang JJ,  
565 et al.. Understanding the Origins of Loss of Protein Function by Analyzing the Effects of  
566 Thousands of Variants on Activity and Abundance. Ozkan B, editor. *Molecular Biology and*  
567 *Evolution.* 2021; doi: 10.1093/molbev/msab095.

568 ~~[51](#). Cagiada M, Bottaro S, Lindemose S, Schenström SM, Stein A, Hartmann Petersen R, et  
569 al.. Discovering functionally important sites in proteins. *bioRxiv*;~~

570 ~~52~~53. Jepsen MM, Fowler DM, Hartmann-Petersen R, Stein A, Lindorff-Larsen K. Chapter 5  
571 - Classifying disease-associated variants using measures of protein activity and stability. In:  
572 Pey AL, editor. Protein Homeostasis Diseases. Academic Press;

573 ~~53~~54. Matreyek KA, Stephany JJ, Ahler E, Fowler DM. Integrating thousands of PTEN vari-  
574 ant activity and abundance measurements reveals variant subgroups and new dominant nega-  
575 tives in cancers. *Genome Med.* 2021; doi: 10.1186/s13073-021-00984-x.

576 ~~54~~55. Mighell TL, Thacker S, Fombonne E, Eng C, O’Roak BJ. An Integrated Deep-  
577 Mutational-Scanning Approach Provides Clinical Insights on PTEN Genotype-Phenotype Re-  
578 lationships. *The American Journal of Human Genetics.* 2020; doi: 10.1016/j.ajhg.2020.04.014.

579

580 ~~55~~56. Nielsen SV, Hartmann-Petersen R, Stein A, Lindorff-Larsen K. Multiplexed assays re-  
581 veal effects of missense variants in MSH2 and cancer predisposition. *PLOS Genetics.* Public  
582 Library of Science; 2021; doi: 10.1371/journal.pgen.1009496.

583 ~~56~~57. The UniProt Consortium, Bateman A, Martin M-J, Orchard S, Magrane M, Agivetova  
584 R, et al.. UniProt: the universal protein knowledgebase in 2021. *Nucleic Acids Research.* 2021;  
585 doi: 10.1093/nar/gkaa1100.

586 ~~57~~58. Andrews B, Fields S. Distinct patterns of mutational sensitivity for  $\lambda$  resistance and  
587 maltodextrin transport in *Escherichia coli* LamB. *Microb Genom.* 2020; doi:  
588 10.1099/mgen.0.000364.

589 ~~58~~59. Bandaru P, Shah NH, Bhattacharyya M, Barton JP, Kondo Y, Cofsky JC, et al.. Decon-  
590 struction of the Ras switching cycle through saturation mutagenesis. *eLife.* 2017; doi:  
591 10.7554/eLife.27810.

592 ~~59~~60. Bolognesi B, Faure AJ, Seuma M, Schmiedel JM, Tartaglia GG, Lehner B. The muta-  
593 tional landscape of a prion-like domain. *Nat Commun.* 2019; doi: 10.1038/s41467-019-12101-  
594 z.

595 ~~60~~61. Bridgford JL, Lee SM, Lee CMM, Guglielmelli P, Rumi E, Pietra D, et al.. Novel driv-  
596 ers and modifiers of MPL-dependent oncogenic transformation identified by deep mutational  
597 scanning. *Blood.* American Society of Hematology; 2020; doi: 10.1182/blood.2019002561.

598 ~~61~~62. Chan KK, Dorosky D, Sharma P, Abbasi SA, Dye JM, Kranz DM, et al.. Engineering  
599 human ACE2 to optimize binding to the spike protein of SARS coronavirus 2. *Science.* Ameri-  
600 can Association for the Advancement of Science; 2020; doi: 10.1126/science.abc0870.

601 ~~62~~63. Chiasson MA, Rollins NJ, Stephany JJ, Sitko KA, Matreyek KA, Verby M, et al.. Mul-  
602 tiplexed measurement of variant abundance and activity reveals VKOR topology, active site  
603 and human variant impact. *Elife.* 2020; doi: 10.7554/eLife.58026.

604 ~~63~~64. Elazar A, Weinstein J, Biran I, Fridman Y, Bibi E, Fleishman SJ. Mutational scanning  
605 reveals the determinants of protein insertion and association energetics in the plasma  
606 membrane. Shan Y, editor. *eLife.* eLife Sciences Publications, Ltd; 2016; doi:  
607 10.7554/eLife.12125.

608 ~~64. Findlay GM, Daza RM, Martin B, Zhang MD, Leith AP, Gasperini M, et al.. Accurate~~  
609 ~~classification of BRCA1 variants with saturation genome editing. *Nature.* 2018; doi:~~  
610 ~~10.1038/s41586-018-0461-z.~~

611 65. Firnberg E, Labonte JW, Gray JJ, Ostermeier M. A Comprehensive, High-Resolution Map  
612 of a Gene's Fitness Landscape. *Mol Biol Evol.* 2014; doi: 10.1093/molbev/msu081.

613 66. Hietpas RT, Jensen JD, Bolon DNA. Experimental illumination of a fitness landscape.  
614 Proceedings of the National Academy of Sciences. 2011; doi: 10.1073/pnas.1016024108.

615 67. Hietpas RT, Bank C, Jensen JD, Bolon DNA. Shifting fitness landscapes in response to  
616 altered environments. *Evolution*. 2013; doi: 10.1111/evo.12207.

617 68. Jiang L, Mishra P, Hietpas RT, Zeldovich KB, Bolon DNA. Latent Effects of Hsp90 Mu-  
618 tants Revealed at Reduced Expression Levels. *PLOS Genetics*. Public Library of Science; 2013;  
619 doi: 10.1371/journal.pgen.1003600.

620 69. Jiang RJ. Exhaustive Mapping of Missense Variation in Coronary Heart Disease-related  
621 Genes [Thesis]. University of Toronto;

622 70. Keskin A, Akdoğan E, Dunn CD. Evidence for Amino Acid Snorkeling from a High-  
623 Resolution, In Vivo Analysis of Fis1 Tail-Anchor Insertion at the Mitochondrial Outer Mem-  
624 brane. *Genetics*. 2017; doi: 10.1534/genetics.116.196428.

625 71. Kitzman JO, Starita LM, Lo RS, Fields S, Shendure J. Massively parallel single-amino-  
626 acid mutagenesis. *Nat Methods*. 2015; doi: 10.1038/nmeth.3223.

627 72. Kotler E, Shani O, Goldfeld G, Lotan-Pompan M, Tarcic O, Gershoni A, et al.. A System-  
628 atic p53 Mutation Library Links Differential Functional Impact to Cancer Mutation Pattern and  
629 Evolutionary Conservation. *Molecular Cell*. Elsevier; 2018; doi: 10.1016/j.molcel.2018.06.012.

630 73. Kowalsky CA, Whitehead TA. Determination of binding affinity upon mutation for type I  
631 dockerin-cohesin complexes from *Clostridium thermocellum* and *Clostridium cellulolyticum*  
632 using deep sequencing. *Proteins: Structure, Function, and Bioinformatics*. 2016; doi:  
633 10.1002/prot.25175.

634 74. McLaughlin Jr RN, Poelwijk FJ, Raman A, Gosal WS, Ranganathan R. The spatial archi-  
635 tecture of protein function and adaptation. *Nature*. 2012; doi: 10.1038/nature11500.

636 75. Melamed D, Young DL, Gamble CE, Miller CR, Fields S. Deep mutational scanning of an  
637 RRM domain of the *Saccharomyces cerevisiae* poly(A)-binding protein. *RNA*. 2013; doi:  
638 10.1261/rna.040709.113.

639 76. Mishra P, Flynn JM, Starr TN, Bolon DNA. Systematic Mutant Analyses Elucidate Gen-  
640 eral and Client-Specific Aspects of Hsp90 Function. *Cell Reports*. 2016; doi:  
641 10.1016/j.celrep.2016.03.046.

642 77. Nedrud D, Coyote-Maestas W, Schmidt D. A large-scale survey of pairwise epistasis re-  
643 veals a mechanism for evolutionary expansion and specialization of PDZ domains. *Proteins:  
644 Structure, Function, and Bioinformatics*. 2021; doi: 10.1002/prot.26067.

645 78. Newberry RW, Arhar T, Costello J, Hartoularos GC, Maxwell AM, Naing ZZC, et al..  
646 Robust Sequence Determinants of  $\alpha$ -Synuclein Toxicity in Yeast Implicate Membrane Binding.  
647 *ACS Chem Biol*. 2020; doi: 10.1021/acscchembio.0c00339.

648 79. Newberry RW, Leong JT, Chow ED, Kampmann M, DeGrado WF. Deep mutational scan-  
649 ning reveals the structural basis for  $\alpha$ -synuclein activity. *Nat Chem Biol*. 2020; doi:  
650 10.1038/s41589-020-0480-6.

651 80. Roscoe BP, Bolon DNA. Systematic Exploration of Ubiquitin Sequence, E1 Activation  
652 Efficiency, and Experimental Fitness in Yeast. *Journal of Molecular Biology*. 2014; doi:  
653 10.1016/j.jmb.2014.05.019.

654 81. Sarkisyan KS, Bolotin DA, Meer MV, Usmanova DR, Mishin AS, Sharonov GV, et al..  
655 Local fitness landscape of the green fluorescent protein. *Nature*. Nature Publishing Group;  
656 2016; doi: 10.1038/nature17995.

657 82. Silverstein RA, Sun S, Verby M, Weile J, Wu Y, Roth FP. A systematic genotype-  
658 phenotype map for missense variants in the human intellectual disability-associated gene GDI1.  
659 bioRxiv;

660 83. Starita LM, Pruneda JN, Lo RS, Fowler DM, Kim HJ, Hiatt JB, et al.. Activity-enhancing  
661 mutations in an E3 ubiquitin ligase identified by high-throughput mutagenesis. *PNAS*. 2013;  
662 doi: 10.1073/pnas.1303309110.

663 84. Starita LM, Young DL, Islam M, Kitzman JO, Gullingsrud J, Hause RJ, et al.. Massively  
664 Parallel Functional Analysis of BRCA1 RING Domain Variants. *Genetics*. 2015; doi:  
665 10.1534/genetics.115.175802.

666 85. Starita LM, Islam MM, Banerjee T, Adamovich AI, Gullingsrud J, Fields S, et al.. A Mul-  
667 tiplex Homology-Directed DNA Repair Assay Reveals the Impact of More Than 1,000 BRCA1  
668 Missense Substitution Variants on Protein Function. *The American Journal of Human Genetics*.  
669 2018; doi: 10.1016/j.ajhg.2018.07.016.

670 86. Suiter CC, Moriyama T, Matreyek KA, Yang W, Scaletti ER, Nishii R, et al.. Massively  
671 parallel variant characterization identifies NUDT15 alleles associated with thiopurine toxicity.  
672 *Proc Natl Acad Sci USA*. 2020; doi: 10.1073/pnas.1915680117.

673 87. Sun S, Weile J, Verby M, Wu Y, Wang Y, Cote AG, et al.. A proactive genotype-to-patient-  
674 phenotype map for cystathionine beta-synthase. *Genome Med*. 2020; doi: 10.1186/s13073-  
675 020-0711-1.

- 676 88. Thompson S, Zhang Y, Ingle C, Reynolds KA, Kortemme T. Altered expression of a quali-  
677 ty control protease in *E. coli* reshapes the in vivo mutational landscape of a model enzyme.  
678 *eLife*. 2020; doi: 10.7554/eLife.53476.
- 679 89. Trenker R, Wu X, Nguyen JV, Wilcox S, Rubin AF, Call ME, et al.. Human and viral  
680 membrane-associated E3 ubiquitin ligases MARCH1 and MIR2 recognize different features  
681 of CD86 to downregulate surface expression. *Journal of Biological Chemistry*. Elsevier; 2021;  
682 doi: 10.1016/j.jbc.2021.100900.
- 683 90. Weile J, Sun S, Cote AG, Knapp J, Verby M, Mellor JC, et al.. A framework for exhaust-  
684 ively mapping functional missense variants. *Mol Syst Biol*. 2017; doi: 10.15252/msb.20177908.
- 685 91. Weile J, Kishore N, Sun S, Maaieh R, Verby M, Li R, et al.. Shifting landscapes of human  
686 MTHFR missense-variant effects. *The American Journal of Human Genetics*. Elsevier; 2021;  
687 doi: 10.1016/j.ajhg.2021.05.009.
- 688 92. Wrenbeck EE, Bedewitz MA, Klesmith JR, Noshin S, Barry CS, Whitehead TA. An Au-  
689 tomated Data-Driven Pipeline for Improving Heterologous Enzyme Expression. *ACS Synth*  
690 *Bi-ol*. American Chemical Society; 2019; doi: 10.1021/acssynbio.8b00486.
- 691 93. Zhang L, Sarangi V, Moon I, Yu J, Liu D, Devarajan S, et al.. CYP2C9 and CYP2C19:  
692 Deep Mutational Scanning and Functional Characterization of Genomic Missense Variants.  
693 *Clinical and Translational Science*. 2020; doi: <https://doi.org/10.1111/cts.12758>.
- 694 94. Zinkus-Boltz J, DeValk C, Dickinson BC. A Phage-Assisted Continuous Selection Ap-  
695 proach for Deep Mutational Scanning of Protein-Protein Interactions. *ACS Chem Biol*. Ameri-  
696 can Chemical Society; 2019; doi: 10.1021/acscchembio.9b00669.

- 697 95. Bernier-Villamor V, Sampson DA, Matunis MJ, Lima CD. Structural Basis for E2-  
698 Mediated SUMO Conjugation Revealed by a Complex between Ubiquitin-Conjugating En-  
699 zyme Ubc9 and RanGAP. *Cell*. 108:122002;
- 700 96. Blanpain C, Doranz BJ, Vakili J, Rucker J, Govaerts C, Baik SSW, et al.. Multiple Charged  
701 and Aromatic Residues in CCR5 Amino-terminal Domain Are Involved in High Af-finity  
702 Binding of Both Chemokines and HIV-1 Env Protein. *J Biol Chem*. 1999; doi:  
703 10.1074/jbc.274.49.34719.
- 704 97. Brzovic PS, Keefe JR, Nishikawa H, Miyamoto K, Fox D, Fukuda M, et al.. Binding and  
705 recognition in the assembly of an active BRCA1/BARD1 ubiquitin-ligase complex. *Proceed-*  
706 *ings of the National Academy of Sciences*. 2003; doi: 10.1073/pnas.0836054100.
- 707 98. Chen S, Wu J, Zhong S, Li Y, Zhang P, Ma J, et al.. iASPP mediates p53 selectivity through  
708 a modular mechanism fine-tuning DNA recognition. *Proc Natl Acad Sci USA*. 2019; doi:  
709 10.1073/pnas.1909393116.
- 710 99. Chupreta S, Holmstrom S, Subramanian L, Iñiguez-Lluhí JA. A Small Conserved Surface  
711 in SUMO Is the Critical Structural Determinant of Its Transcriptional Inhibitory Properties.  
712 *MCB*. 2005; doi: 10.1128/MCB.25.10.4272-4282.2005.
- 713 100. Cobb JA, Roberts DM. Structural Requirements for N-Trimethylation of Lysine 115 of  
714 Calmodulin. *Journal of Biological Chemistry*. 2000; doi: 10.1074/jbc.M002332200.
- 715 101. Coyne RS, McDonald HB, Edgemon K, Brody LC. Functional Characterization of  
716 BRCA1 Sequence Variants using a Yeast Small Colony Phenotype Assay. *Cancer Biology &*  
717 *Therapy*. 2004; doi: 10.4161/cbt.3.5.809.



- 718 102. Denker K, Orlik F, Schiffler B, Benz R. Site-directed Mutagenesis of the Greasy Slide  
719 Aromatic Residues Within the LamB (Maltoporin) Channel of Escherichia coli: Effect on Ion  
720 and Maltopentaose Transport. *Journal of Molecular Biology*. 2005; doi:  
721 10.1016/j.jmb.2005.07.025.
- 722 103. Dragic T, Trkola A, Lin SW, Nagashima KA, Kajumo F, Zhao L, et al.. Amino-Terminal  
723 Substitutions in the CCR5 Coreceptor Impair gp120 Binding and Human Immunodeficiency  
724 Virus Type 1 Entry. *J Virol*. 1998; doi: 10.1128/JVI.72.1.279-285.1998.
- 725 104. Dragic T, Trkola A, Thompson DAD, Cormier EG, Kajumo FA, Maxwell E, et al.. A  
726 binding pocket for a small molecule inhibitor of HIV-1 entry within the transmembrane helices  
727 of CCR5. *Proceedings of the National Academy of Sciences*. 2000; doi:  
728 10.1073/pnas.090576697.
- 729 105. Ecsédi P, Gógl G, Hóf H, Kiss B, Harmat V, Nyitray L. Structure Determination of the  
730 Transactivation Domain of p53 in Complex with S100A4 Using Annexin A2 as a Crystalliza-  
731 tion Chaperone. *Structure*. 2020; doi: 10.1016/j.str.2020.05.001.
- 732 106. Kopecká J, Krijt J, Raková K, Kožich V. Restoring assembly and activity of cystathionine  
733  $\beta$ -synthase mutants by ligands and chemical chaperones. *Journal of Inherited Metabolic Dis-*  
734 *ease*. 2011; doi: 10.1007/s10545-010-9087-5.
- 735 107. Kožich V, Sokolová J, Klatovská V, Krijt J, Janošík M, Jelínek K, et al.. Cystathionine  $\beta$ -  
736 synthase mutations: effect of mutation topology on folding and activity. *Hum Mutat*. 2010; doi:  
737 10.1002/humu.21273.

738 108. Kruger W d., Wang L, Jhee K h., Singh R h., Elsas II L j.. Cystathionine  $\beta$ -synthase defi-  
739 ciency in Georgia (USA): Correlation of clinical and biochemical phenotype with genotype.  
740 Human Mutation. 2003; doi: 10.1002/humu.10290.

741 109. Lee SY, Pullen L, Virgil DJ, Castañeda CA, Abeykoon D, Bolon DNA, et al.. Alanine  
742 Scan of Core Positions in Ubiquitin Reveals Links between Dynamics, Stability, and Function.  
743 Journal of Molecular Biology. 2014; doi: 10.1016/j.jmb.2013.10.042.

744 110. Li W, Zhang C, Sui J, Kuhn JH, Moore MJ, Luo S, et al.. Receptor and viral determinants  
745 of SARS-coronavirus adaptation to human ACE2. EMBO J. 2005; doi:  
746 10.1038/sj.emboj.7600640.

747 111. Lin G, Baribaud F, Romano J, Doms RW, Hoxie JA. Identification of gp120 Binding Sites  
748 on CXCR4 by Using CD4-Independent Human Immunodeficiency Virus Type 2 Env Proteins.  
749 JVI. 2003; doi: 10.1128/JVI.77.2.931-942.2003.

750 112. Mascle XH, Lussier-Price M, Cappadocia L, Estephan P, Raiola L, Omichinski JG, et al..  
751 Identification of a Non-covalent Ternary Complex Formed by PIAS1, SUMO1, and UBC9  
752 Proteins Involved in Transcriptional Regulation. Journal of Biological Chemistry. 2013; doi:  
753 10.1074/jbc.M113.486845.

754 113. Matthews EE, Thévenin D, Rogers JM, Gotow L, Lira PD, Reiter LA, et al.. Thrombo-  
755 poietin receptor activation: transmembrane helix dimerization, rotation, and allosteric modula-  
756 tion. The FASEB Journal. 2011; doi: <https://doi.org/10.1096/fj.10-178673>.

757 114. Mayfield JA, Davies MW, Dimster-Denk D, Pleskac N, McCarthy S, Boydston EA, et al..  
758 Surrogate Genetics and Metabolic Profiling for Characterization of Human Disease Alleles.  
759 Genetics. 2012; doi: 10.1534/genetics.111.137471.

760 115. Navenot J-M, Wang Z, Trent JO, Murray JL, Hu Q, DeLeeuw L, et al.. Molecular anat-  
761 my of CCR5 engagement by physiologic and viral chemokines and HIV-1 envelope glycopro-  
762 teins: differences in primary structural requirements for RANTES, MIP-1 $\alpha$ , and vMIP-II bind-  
763 ing11Edited by P. E. Wright. *Journal of Molecular Biology*. 2001; doi:  
764 10.1006/jmbi.2001.5086.

765 116. Peng L, Damschroder MM, Cook KE, Wu H, Dall'Acqua WF. Molecular basis for the  
766 antagonistic activity of an anti-CXCR4 antibody. *mAbs*. 2016; doi:  
767 10.1080/19420862.2015.1113359.

768 117. Peterson BR, Sun LJ, Verdine GL. A critical arginine residue mediates cooperativity in  
769 the contact interface between transcription factors NFAT and AP-1. *Proceedings of the*  
770 *National Academy of Sciences*. 1996; doi: 10.1073/pnas.93.24.13671.

771 118. Rabut GEE, Konner JA, Kajumo F, Moore JP, Dragic T. Alanine Substitutions of Polar  
772 and Nonpolar Residues in the Amino-Terminal Domain of CCR5 Differently Impair Entry of  
773 Macrophage- and Dualtropic Isolates of Human Immunodeficiency Virus Type 1. *J Virol*. 1998;  
774 doi: 10.1128/JVI.72.4.3464-3468.1998.

775 119. Ransburgh DJR, Chiba N, Ishioka C, Toland AE, Parvin JD. Identification of Breast Tu-  
776 mor Mutations in BRCA1 That Abolish Its Function in Homologous DNA Recombination.  
777 *Cancer Res*. 2010; doi: 10.1158/0008-5472.CAN-09-2850.

778 120. Tan Y, Tong P, Wang J, Zhao L, Li J, Yu Y, et al.. The Membrane-Proximal Region of  
779 C–C Chemokine Receptor Type 5 Participates in the Infection of HIV-1. *Front Immunol*. 2017;  
780 doi: 10.3389/fimmu.2017.00478.

781 121. Towler WI, Zhang J, Ransburgh DJR, Toland AE, Ishioka C, Chiba N, et al.. Analysis of  
782 BRCA1 Variants in Double-Strand Break Repair by Homologous Recombination and Single-  
783 Strand Annealing. *Human Mutation*. 2013; doi: 10.1002/humu.22251.

784 122. Trent JO, Wang Z, Murray JL, Shao W, Tamamura H, Fujii N, et al.. Lipid Bilayer Simu-  
785 lations of CXCR4 with Inverse Agonists and Weak Partial Agonists. *J Biol Chem*. 2003; doi:  
786 10.1074/jbc.M307850200.

787 123. Van Gelder P, Dumas F, Bartoldus I, Saint N, Prilipov A, Winterhalter M, et al.. Sugar  
788 Transport through Maltoporin of *Escherichia coli* : Role of the Greasy Slide. *J Bacteriol*. 2002;  
789 doi: 10.1128/JB.184.11.2994-2999.2002.

790 124. VanBerkum MF, Means AR. Three amino acid substitutions in domain I of calmodulin  
791 prevent the activation of chicken smooth muscle myosin light chain kinase. *J Biol Chem*.  
792 American Society for Biochemistry and Molecular Biology; 266:21488–951991;

793 125. Wei Q, Wang L, Wang Q, Kruger WD, Dunbrack RL. Testing computational prediction  
794 of missense mutation phenotypes: Functional characterization of 204 mutations of human  
795 cysta-thionine beta synthase. *Proteins: Structure, Function, and Bioinformatics*. 2010; doi:  
796 10.1002/prot.22722.

797 126. Williams AD, Shivaprasad S, Wetzel R. Alanine Scanning Mutagenesis of A $\beta$ (1-40) Am-  
798 yloid Fibril Stability. *Journal of Molecular Biology*. 2006; doi: 10.1016/j.jmb.2006.01.041.

799 127. Zhang J, Rao E, Dioszegi M, Kondru R, DeRosier A, Chan E, et al.. The Second Extracel-  
800 lular Loop of CCR5 Contains the Dominant Epitopes for Highly Potent Anti-Human Immuno-  
801 deficiency Virus Monoclonal Antibodies. *AAC*. 2007; doi: 10.1128/AAC.01302-06.

802 128. Nelsen RB. *An introduction to copulas*. 2nd ed. New York: Springer;

803 129. Bedó J, Ong CS. Multivariate Spearman's rho for aggregating ranks using copulas. Journal  
804 of Machine Learning Research. arXiv; 2016; doi: 10.48550/ARXIV.1410.4391.

805 ~~129~~130. Pedregosa F, Varoquaux G, Gramfort A, Michel V, Thirion B, Grisel O, et al.. Scikit-  
806 learn: Machine Learning in Python. Journal of machine Learning research. :2825–30 2011;

807 131. Hunter JD. Matplotlib: A 2D Graphics Environment. Computing in Science & Engineer-  
808 ing. 2007; doi: 10.1109/MCSE.2007.55.

809 132. Choi Y, Sims GE, Murphy S, Miller JR, Chan AP. Predicting the Functional Effect of  
810 Amino Acid Substitutions and Indels. de Brevern AG, editor. PLoS ONE. 2012; doi:  
811 10.1371/journal.pone.0046688.

812 133. Vaser et al.. SIFT missense predictions for genomes. Nature Protocols. 2016;

813 134. Adzhubei IA, Schmidt S, Peshkin L, Ramensky VE, Gerasimova A, Bork P, et al.. A  
814 method and server for predicting damaging missense mutations. Nature Methods. 2010; doi:  
815 10.1038/nmeth0410-248.

816 135. Laine E, Karami Y, Carbone A. GEMME: A Simple and Fast Global Epistatic Model  
817 Predicting Mutational Effects. Molecular Biology and Evolution. 2019; doi:  
818 10.1093/molbev/msz179.

819 136. Meier J, Rao R, Verkuil R, Liu J, Sercu T, Rives A. Language models enable zero-shot  
820 prediction of the effects of mutations on protein function. bioRxiv;

821 137. Frazer J, Notin P, Dias M, Gomez A, Min JK, Brock K, et al.. Disease variant prediction  
822 with deep generative models of evolutionary data. Nature. 2021; doi: 10.1038/s41586-021-  
823 04043-8.

824 138. Livesey BJ, Marsh JA. Updated benchmarking of variant effect predictors using deep mu-  
825 tational scanning. bioRxiv;

826 ~~130~~139. González J, Dai Z, Hennig P, Lawrence ND. Batch Bayesian Optimization via Local  
827 Pe-nalization. arXiv;

828

## 829 **Supplementary material**

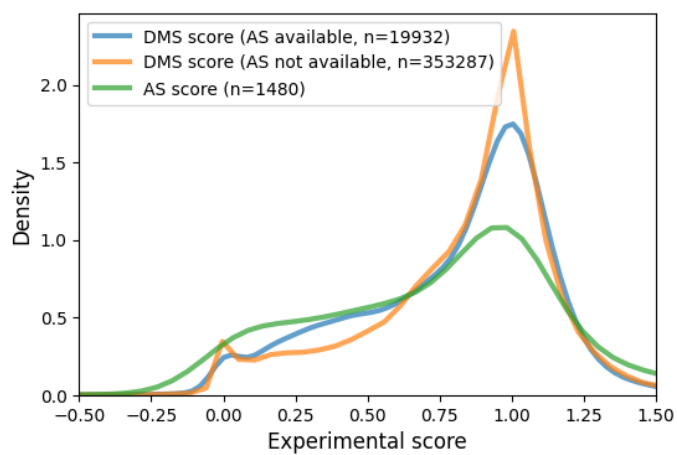

830

831 **Fig S1. DMS and AS score distribution.** The figure shows the kernel estimated density of normalized AS  
832 scores and DMS scores for variants with or without available AS data.

833

For each pair of DMS and AS experiments:

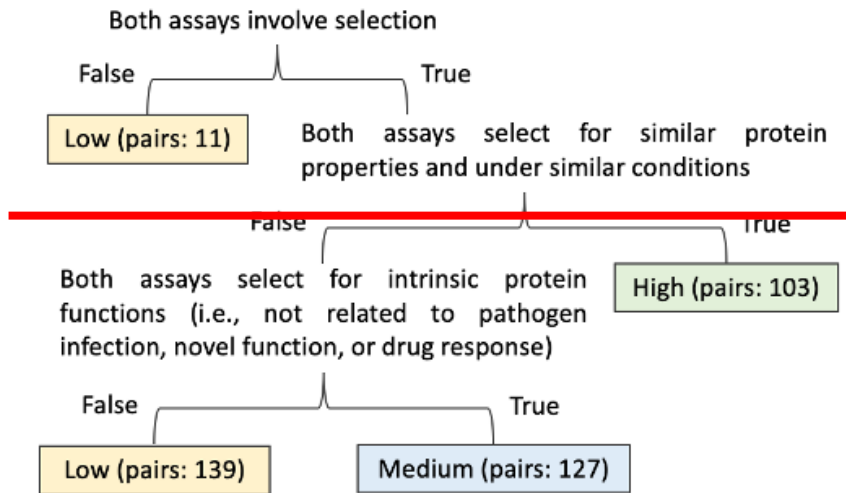

834

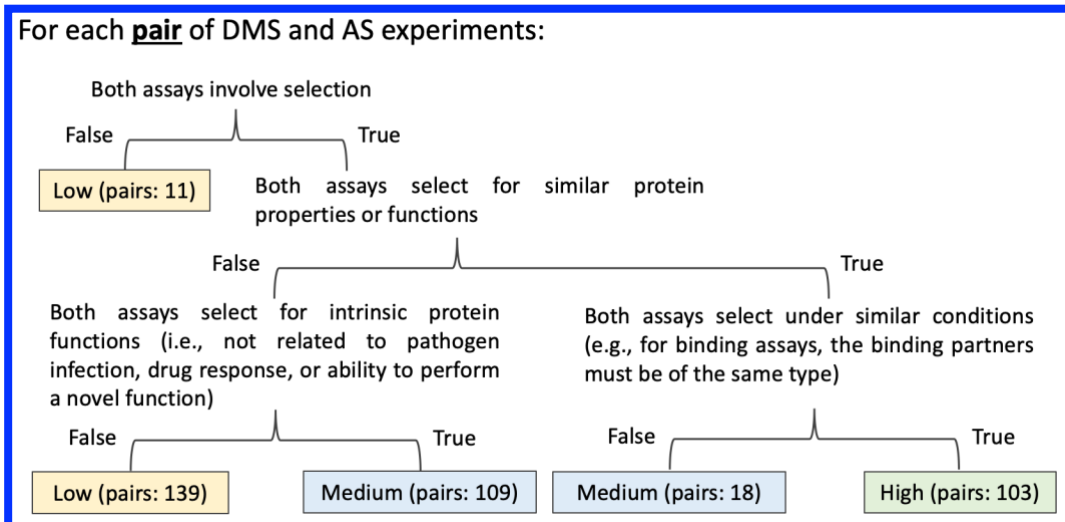

835

836 **Fig S2. Decision tree for classifying the DMS and AS assay compatibility.** The ~~end-nodes~~ similarity of DMS  
 837 and AS assays are compared (Methods) and the DMS/AS assay pairs are classified using three levels of  
 838 compatibility (low, medium, high). The leaf-node text and color show the classified assay compatibility. The  
 839 number indicates the count of assay pairs for each compatibility level (~~low, medium, high~~).

840

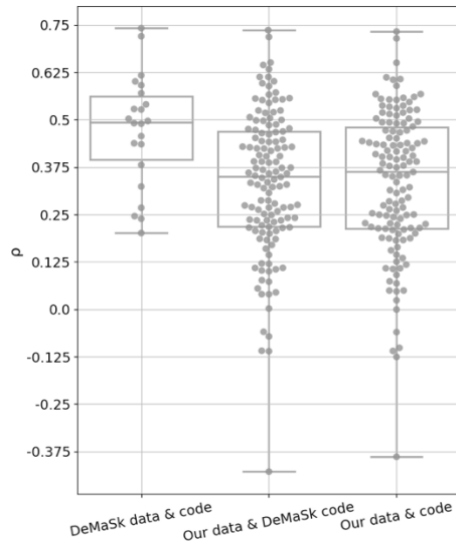

841

842 **Fig S3. Comparison between published and re-implemented predictors.** The plot shows leave-one-protein-  
 843 out cross-validation performance on predictors built from the published DeMaSk code or our code. The predictors  
 844 were trained and evaluated on DMS data either provided by the DeMaSk study or curated by our own. The  
 845 “DeMaSk data & code” result is similar to the published result. For the “Our data & DeMaSk code” result, we  
 846 used our own data and published code which shows a median performance around 0.35. This is probably because  
 847 many more DMS results are included in our data. The similarity of results achieved using “Our data & code”  
 848 demonstrates the correctness of our re-implementation. (Whiskers show the full value range)

849



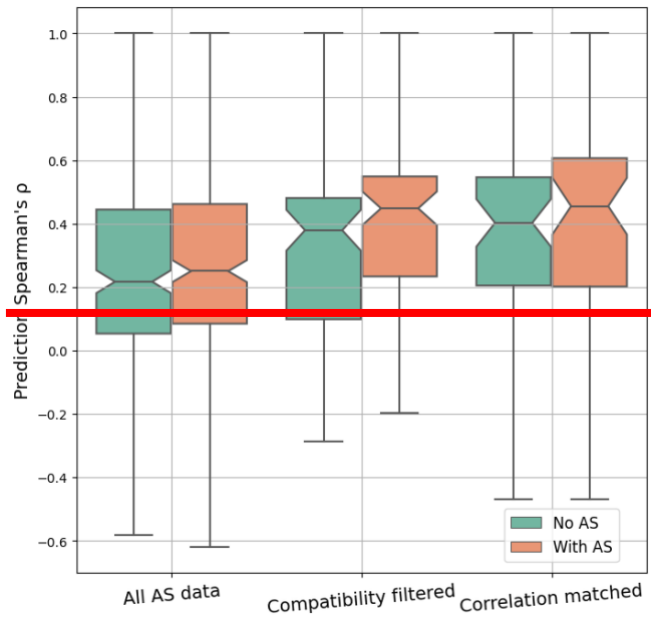

850

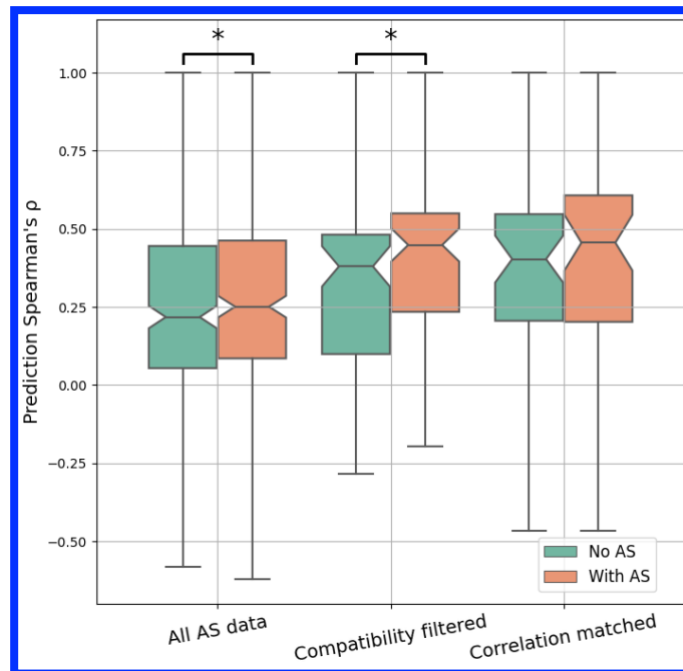

851  
852

**Fig S4. Performance comparison between predictors using with or without AS data or not.** The Spearman's  $\rho$  between experiment-DMS scores and predicted scores for each DMS and AS data pair are shown as box plots. Different approaches to filtering/matching the data are shown on the x-axis: "All AS data" used all available data; "Compatibility filtered" used only data of high assay compatibility; "Correlation matched" used only data with the highest regularised correlation for each DMS dataset. The figure does not include data without available (filtered/matched) AS scores. This means that the different results are not directly comparable since they are visualized on computed for different subsets of DMS/AS data pairs (for example, "All AS data" contains all DMS/AS data pairs, but "Compatibility filtered" contains only data pairs of high assay compatibility). Control

860 results are shown as green boxes for **predicting predictions on the same residues** without AS data as a feature. The  
 861 underlying  $\rho$  for each data pair in the control results is the same, but the boxes are shifted due to data  
 862 filtering/**matching**. Results for data pairs with only one residue are not shown. P-values were calculated using  
 863 paired t-test and jointly corrected using Holm-Šidák (Methods), \*:  $p < 0.05$ . Notches show the 95% confidence  
 864 interval around the median, and whiskers show the full value range.

865

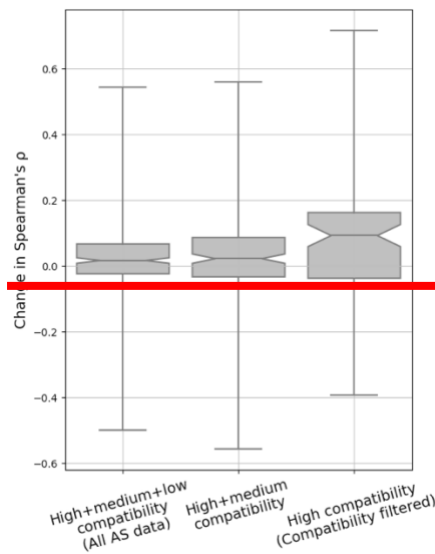

866

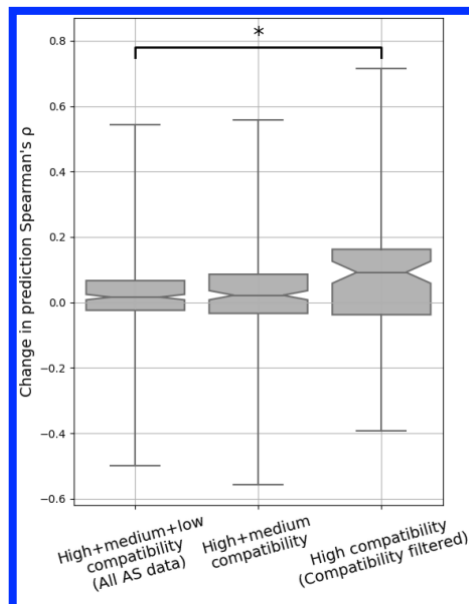

867  
 868 **Fig S5. The change in prediction performance of variant impact prediction for using data of different**  
 869 **assay compatibility levels.** The change of prediction Spearman's  $\rho$  for each DMS and AS data pair is shown as  
 870 box plots. A higher value represents higher prediction accuracy achieved for using AS data. Different data filtering  
 871 methods are shown on the x-axis. Results for data pairs with only one residue are not shown. P-values were

872 calculated using Welch's test and jointly corrected using Holm-Šidák (Methods), \*:  $p < 0.05$ . Notches show the  
873 95% confidence interval around the median, and whiskers show the full value range.

874

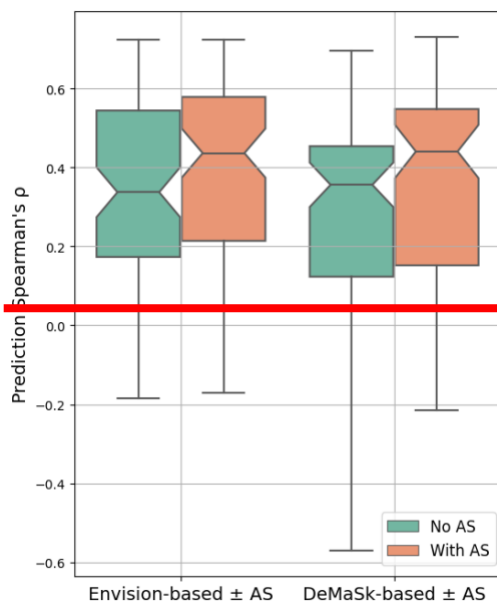

875

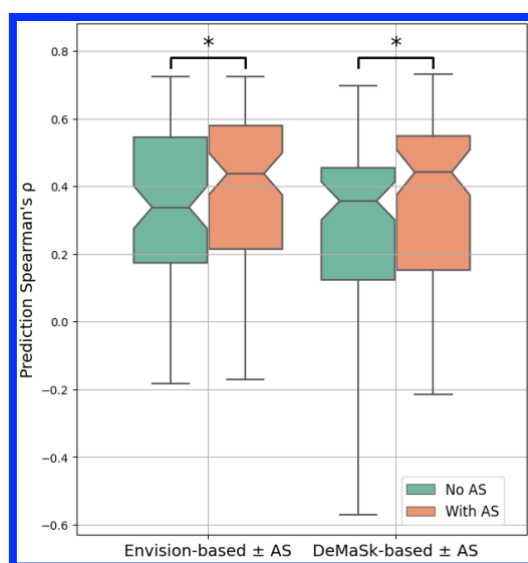

876

877 **Fig S6. Prediction performance is improved while incorporating high compatibility AS data into the**

878 **Envision model.** The Spearman's  $\rho$  between experiment DMS scores and predicted scores for each **high**

879 **compatible** DMS/AS assay pair **with high compatibility** are shown as box plots. The x-axis shows the predictor

880 used, either Envision or DeMaSk. Control results are shown as green boxes for **predicting without AS data as a**

881 **feature** predictions on the same residues **without AS data as a feature**. Results for data pairs with only one residue

882 are not shown. P-values were calculated using paired t-test and jointly corrected using Holm-Šidák (Methods), \*:

883  $p < 0.05$ . Notches show the 95% confidence interval around the median, and whiskers show the full value range.

884

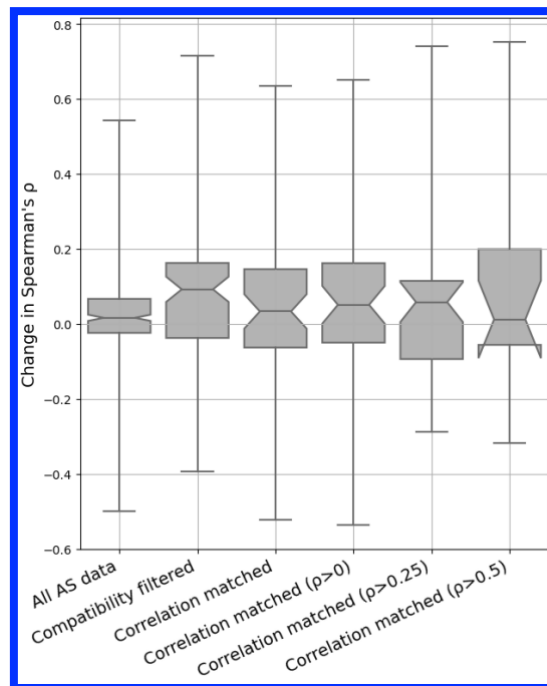

885  
886

**Fig S7. Performance improvement on thresholded correlation matching.** The change of prediction  $\rho$  for each DMS and AS data pair is shown as box plots. Different approaches to filtering/matching the data are shown on the x-axis: “All AS data”, “Compatibility filtered” and “Correlation matched” are the same results as previously discussed; while doing correlation matching, a further thresholding (0, 0.25 or 0.5) on the regularized DMS/AS correlation values ( $\rho_r$ ) was applied. Notches show the 95% confidence interval around the median, and whiskers show the full value range.

892

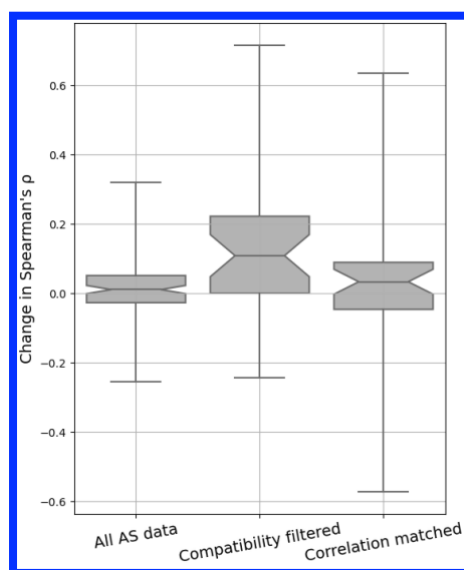

893  
894

**Fig S8. Performance improvement on averaged DMS/AS testing data.** This figure shows model performance when we averaged variant scores for DMS or AS data that are: i) published in the same paper; ii)

895

896 targeting the same protein region; iii) measured by the same type of assays (Supplementary Table 1). The change  
 897 of prediction  $\rho$  for each averaged DMS and AS data pair is shown. A higher value represents higher prediction  
 898 accuracy achieved when using AS data. Different approaches to filtering/matching the data are shown on the x-  
 899 axis: “All AS data” used all available data; “Compatibility filtered” used only data of high assay compatibility;  
 900 “Correlation matched” used only data with the highest regularised correlation for each DMS dataset. Results for  
 901 data pairs with only one residue are not shown. Notches show the 95% confidence interval around the median,  
 902 and whiskers show the full value range.

903

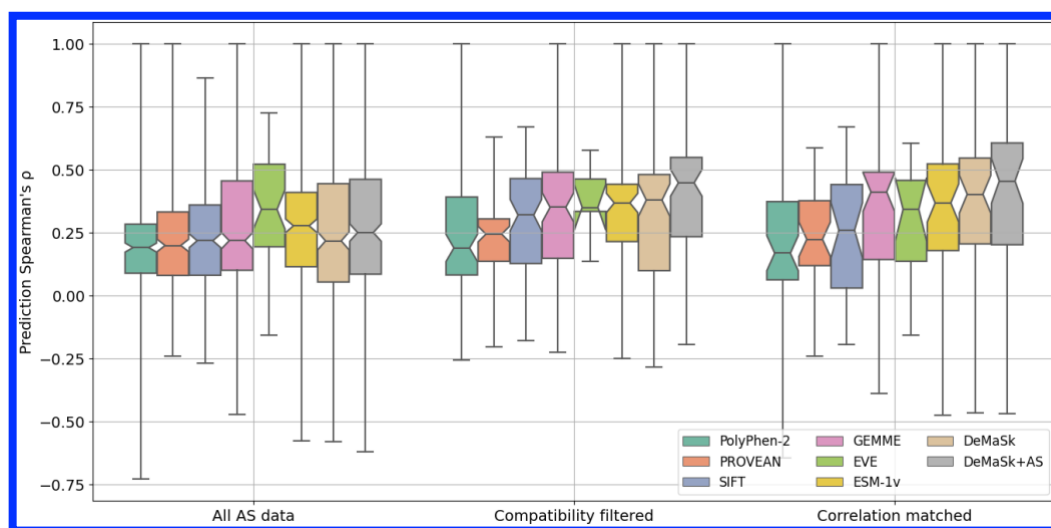

904 **Fig S9. Model performance on various variant effect predictors.** The Spearman's  $\rho$  between DMS scores  
 905 and predicted scores from different variant effect predictors for each DMS and AS pair are shown as box plots.  
 906 Results are evaluated on different sets of variant data shown on the x-axis: “All AS data” used all available data;  
 907 “Compatibility filtered” used only data of high assay compatibility; “Correlation matched” used only AS data  
 908 with the highest regularised correlation for each DMS dataset. The figure does not include residues without  
 909 available AS scores. Results for data pairs with only one residue are not shown. Notches show the 95% confidence  
 910 interval around the median, and whiskers show the full value range.

912

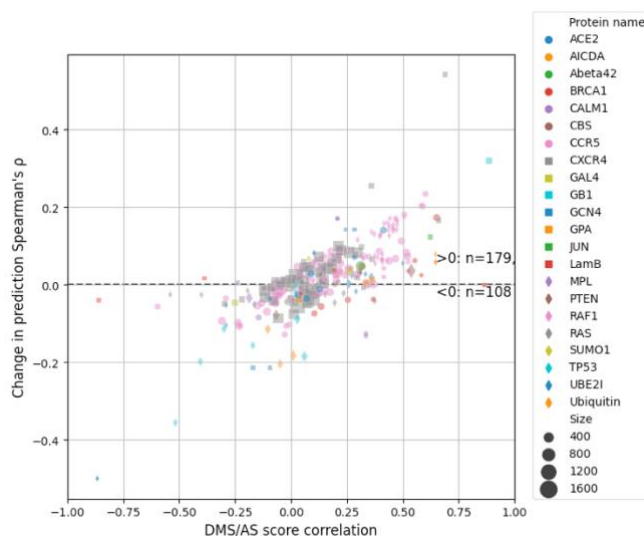

913

914 **Fig S10. Fig S7. Prediction performance change for using all AS data.** Each dot represents a DMS/AS data  
 915 pair. The vertical axis shows the change of prediction  $\rho$  by using AS data (larger means higher performance  
 916 achieved by using AS data). The horizontal axis shows the DMS/AS score correlation for *all* variants on the  
 917 matched residues rather than just alanine substitutions. The colours and shapes of the dots correspond to the target  
 918 protein, and size indicates the number of variants in each data pair. [Results for data pairs with only one residue](#)  
 919 [are not shown.](#)

920

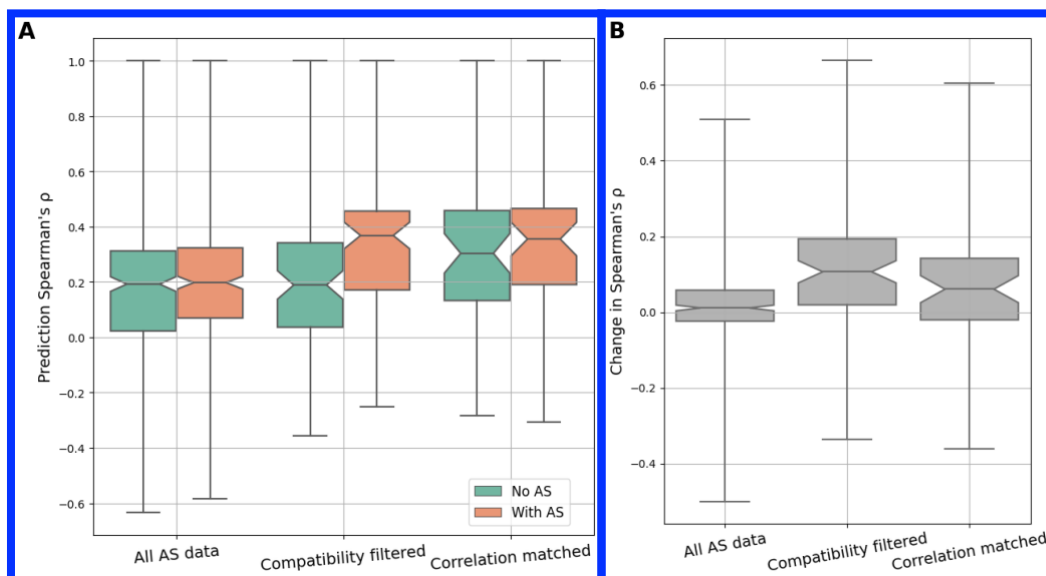

921  
 922

**Fig S11. Model performance for training with AS-data-available-residues.** The predictors were trained only  
 923 on variants that have AS data available. Panel A shows the performance visualized by prediction Spearman's  $\rho$   
 924 for DMS scores and predicted scores for each DMS and AS data pair. Different approaches to filtering the data  
 925 are shown on the x-axis: "All AS data" used all available data; "Compatibility filtered" used only data of high

926 assay compatibility; “Correlation matched” used only AS data with the highest regularised correlation for each  
 927 DMS dataset. Control results are shown as green boxes for predictions on the same residues without AS data as a  
 928 feature. Panel B shows change of prediction  $\rho$  for each DMS and AS data pair. A higher value indicates higher  
 929 prediction accuracy achieved when using AS data. Different approaches to filtering the data are also shown on  
 930 the x-axis as described. Notches show the 95% confidence interval around the median, and whiskers show the full  
 931 value range.

932

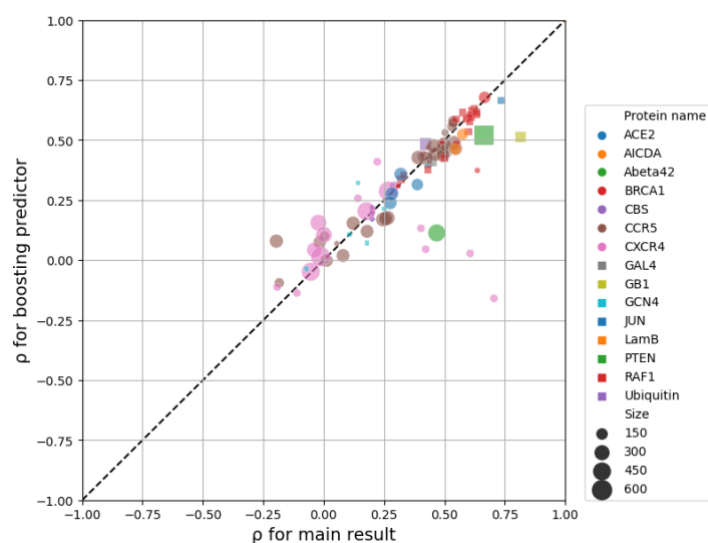

933

934 **Fig S12. Fig S8. Boosting setup shows similar performance as the main result.** Each dot represents a filtered  
 935 DMS/AS data pair of high assay compatibility. The vertical and horizontal axes show the prediction Spearman’s  
 936  $\rho$  for either modelled with boosting or the one-step (main result) setup. The colours and shapes of the dots  
 937 correspond to the target protein, and size indicates the number of variants in each data pair.

938

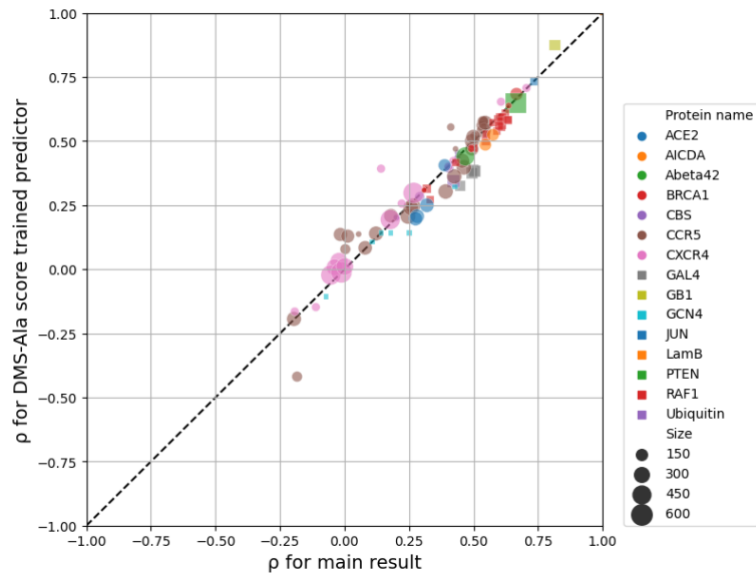

939

940 **Fig S13. Fig-S9. Training with DMS scores of alanine substitutions shows similar performance as the**  
 941 **main result.** The vertical and horizontal axes show the prediction Spearman's  $\rho$  for predictors either trained with  
 942 DMS score of alanine substitutions (DMS-Ala) or AS data of high assay compatibility (main result), yet all  
 943 evaluated on high compatibility AS data. The colours and shapes of the dots correspond to the target protein, and  
 944 size indicates the number of variants in each data pair.

945

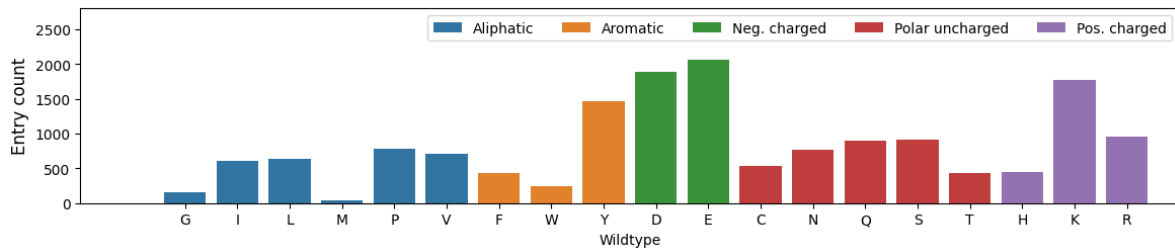

946

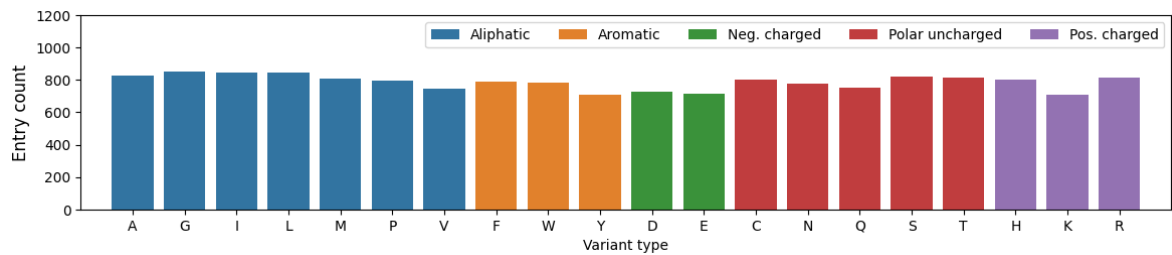

947

948 **Fig S14. Fig-S10. Count of variant entries for each wild-type or variant amino acid of high assay**  
 949 **compatibility data.** (Neg.: negatively, Pos.: positively)

950



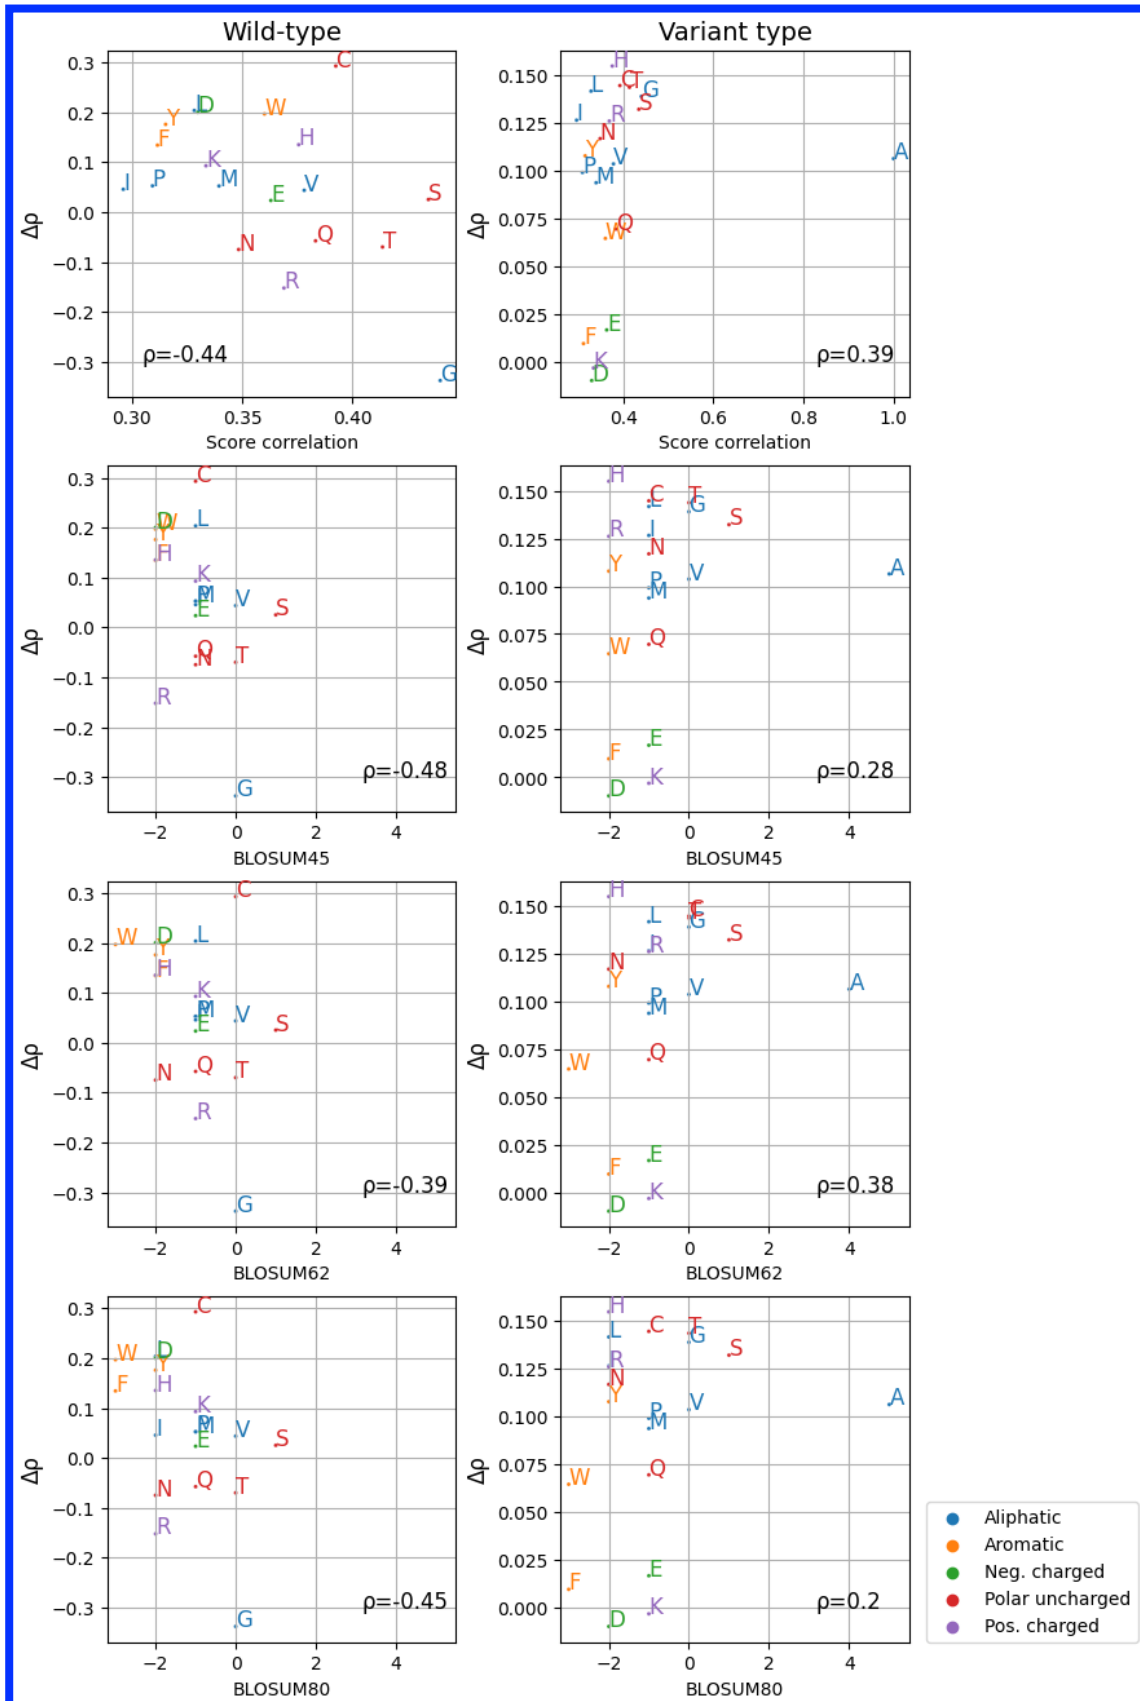

951  
952

**Fig S15. Relationship between amino acid similarity and model performance.** For each amino acid, its

953

similarity to alanine was computed by their DMS score correlation or using BLOSUM scores as shown on the x-

954 axis. The performance improvement ( $\Delta\rho$ ) for each wild-type (left) or variant (right) amino acid while using AS  
 955 data were computed as previously mentioned (Fig 7), with their Spearman’s correlation against the similarity  
 956 measurements shown on the figure. The label for each amino acid is coloured by the amino acid physicochemical  
 957 property. (Neg.: negatively; Pos.: positively)

958

959 **Table S1. DMS/AS correlation on each secondary structural region.** The secondary structure of each variant  
 960 is determined by UniProt annotations. The Spearman’s correlation between DMS and all or high compatibility  
 961 AS data on each structural region is computed, with the number of protein residues involved shown in parenthesis.

| $\rho$ (n_residues)      | HELIX      | STRAND    | TURN      |
|--------------------------|------------|-----------|-----------|
| All AS                   | 0.13 (233) | 0.13 (83) | 0.17 (22) |
| AS of high compatibility | 0.28 (115) | 0.26 (56) | 0.41 (15) |

962

963 **Table S2. ~~Table S1.~~ Amount of data with AS scores available**

| Data composition                | Protein | DMS dataset | AS dataset <sup>1</sup> | Variant entries <sup>2</sup> |
|---------------------------------|---------|-------------|-------------------------|------------------------------|
| All AS                          | 22      | 54          | 146                     | 70446                        |
| Compatibility filtered          | 15      | 35          | 60                      | 15739                        |
| High+medium assay compatibility | 21      | 51          | 105                     | 28380                        |
| Correlation matched             | 22      | 54          | 32                      | 7940                         |

964 1. This column shows how many unique AS datasets are included.

965 2. Include duplicated variants caused by multiple experiments targeting the same protein variant.

966

## 967 **Supplementary information**

### 968 **Applying AS data to Envision method**

969 We re-implemented a predictor based on Envision [\[15\]](#)[\[17\]](#) to incorporate AS data. Features  
 970 used in Envision were downloaded from its online toolkit. All Envision features are used for

971 modelling except for substitution type (wt\_mut) which has low importance according to the  
972 published result and our pilot studies yet is computationally expensive in our setup. Protein  
973 data were excluded if their features were not available online. DMS and AS data pairs with  
974 high assay compatibility were used for modelling. Missing feature values were imputed by the  
975 mean values for numerical features or the most frequent values for categorical features.  
976 Categorical features are encoded with the one-hot encoder. We used  
977 `sklearn.ensemble.GradientBoostingRegressor` from scikit-learn package  
978 ~~[129]~~[130] to build the predictor, and hyperparameters were tuned by Bayesian Optimization  
979 ~~[130]~~[139] with Group K-Fold (protein-30-fold) cross-validation. The training and evaluation  
980 process were similar to that previously described. For comparison, we repeated the DeMaSk-  
981 based analysis on the same subset of data.

982

### 983 **Boosting with AS data**

984 To deal with the sparsity of AS data, we tested a variant impact predictor based on boosting. A  
985 first linear regression predictor was trained with all training DMS data using the three DeMaSk  
986 features without AS data, which was the same as the control predictor mentioned previously.  
987 We then calculated the prediction error by subtracting the predicted scores from DMS scores,  
988 and a second linear regression predictor was trained to predict the error. The second predictor  
989 was trained only on DMS/AS data of high assay compatibility and used both protein features  
990 and the encoded AS scores. The final prediction result was the sum of the outputs from these  
991 two predictors.

992

### 993 **Replacing AS data with DMS scores of alanine substitutions**

994 We investigated another potential approach to overcome the sparsity of AS data by replacing  
995 the AS feature with the DMS scores of alanine substitutions (DMS-Ala). ~~For~~The intention of

996 this study is to model the scenario of ideal AS data, which perfectly matches the DMS-Ala data  
997 during training. To do this, for all DMS datasets we collected, their AS feature values,  
998 regardless of availability, were replaced by the DMS-Ala scores on the same residue. Missing  
999 scores were imputed by the mean value of all DMS-Ala scores. A regression model was trained  
1000 and evaluated as previously described, using the three DeMaSk features as well as the DMS-  
1001 Ala scores. The AS data of high assay compatibility are still used for the testing process.  
1002

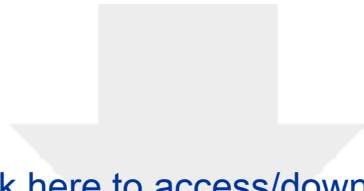

Click here to access/download

**Supplementary Material**

[Supplementary\\_Table\\_2\\_Supplementary\\_Material.csv](#)

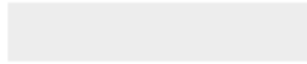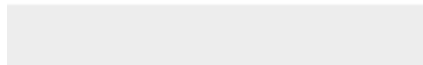

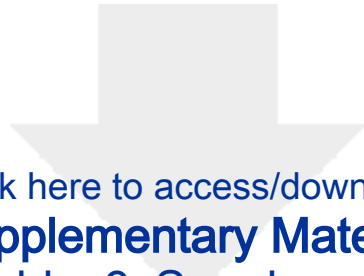

[Click here to access/download](#)

**Supplementary Material**

[Supplementary\\_Table\\_3\\_Supplementary\\_Material.csv](#)

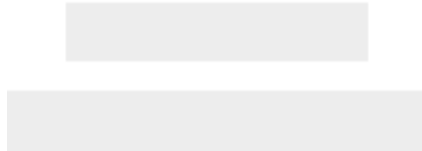

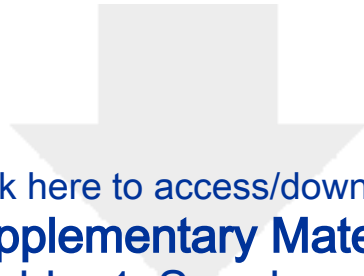

Click here to access/download

**Supplementary Material**

Supplementary\_Table\_1\_Supplementary Material.xlsx



Supplement: giad073_giga-d-23-00040_revision_1.pdf [file giad073_giga-d-23-00040_revision_1.pdf]
