# Supplementary material for: Integrating deep mutational scanning and low-throughput mutagenesis data to predict the impact of amino acid variants
Source: PubMed Central journal article supplement (PMC10506130; doi:10.1093/gigascience/giad073), 2023-09-18
Supplement: giad073_response_to_reviewer_comments_original_submission.pdf [file giad073_response_to_reviewer_comments_original_submission.pdf]

## **Author's Response To Reviewer Comments**

We thank the reviewers for their thoughtful comments, which helped us improve our study and the manuscript.

We have attached a detailed response to the reviews (Review\_response\_untracked.pdf) as well as a version of the updated manuscript with all changes from the original submission highlighted (diff\_manuscript.pdf).
